# Supplementary material for: Isolation and Structure Elucidation of New Cytotoxic Macrolides Halosmysins B and C from the Fungus Halosphaeriaceae sp. Associated with a Marine Alga
Source: MDPI journal article supplement (doi:10.3390/md20040226), 2022-03-25

## Supplementary Materials

### Isolation and structure elucidation of new cytotoxic macrolides halosmysins B and C from the fungus *Halosphaeriaceae* sp. associated with a marine alga

Takeshi Yamada \*, Kanoko Yoshida, Takashi Kikuchi and Tomoya Hirano <sup>1</sup>

#### The Table of Contents

|            |                                                                                                            |    |
|------------|------------------------------------------------------------------------------------------------------------|----|
| Table S1   | Spectral data including 2D NMR data for 2                                                                  | 1  |
| Table S2   | Spectral data including 2D NMR data for 3                                                                  | 2  |
| Figure S1  | 14-membered macrodiolides associated to halosmysins                                                        | 3  |
| Figure S2  | <sup>1</sup> H NMR spectrum of 2 in CDCl <sub>3</sub>                                                      | 4  |
| Figure S3  | <sup>13</sup> C NMR spectrum of 2 in CDCl <sub>3</sub>                                                     | 10 |
| Figure S4  | <sup>1</sup> H- <sup>1</sup> H COSY of 2                                                                   | 13 |
| Figure S5  | NOESY of 2                                                                                                 | 16 |
| Figure S6  | HMQC of 2                                                                                                  | 19 |
| Figure S7  | HMBC of 2                                                                                                  | 21 |
| Figure S8  | FABMS of 2                                                                                                 | 26 |
| Figure S9  | IR spectrum of 2                                                                                           | 29 |
| Figure S10 | <sup>1</sup> H NMR spectrum of 3 in MeOH- <i>d</i> <sub>4</sub>                                            | 30 |
| Figure S11 | <sup>13</sup> C NMR spectrum of 3 in MeOH- <i>d</i> <sub>4</sub>                                           | 35 |
| Figure S12 | <sup>1</sup> H- <sup>1</sup> H COSY of 3                                                                   | 39 |
| Figure S13 | NOESY of 3                                                                                                 | 42 |
| Figure S14 | HMQC of 3                                                                                                  | 45 |
| Figure S15 | HMBC of 3                                                                                                  | 48 |
| Figure S16 | FABMS of 3                                                                                                 | 52 |
| Figure S17 | IR spectrum of 3                                                                                           | 55 |
| Figure S18 | HPLC chromatograms of halosmycins A, B, and C                                                              | 56 |
| Figure S19 | <sup>1</sup> H NMR spectrum of 5-hydroxy-(2 <i>E</i> )-hexenoic acid in MeOH- <i>d</i> <sub>4</sub>        | 57 |
| Figure S20 | <sup>1</sup> H NMR spectrum of 4,5,7-trihydroxy-(2 <i>E</i> )-octenoic acid in MeOH- <i>d</i> <sub>4</sub> | 58 |

Table S1 NMR spectral data of **2** in CDCl<sub>3</sub>

| Position          | $\delta_{\text{H}}^{\text{a}}$ |      | J/Hz                                             | $^1\text{H}$ - $^1\text{H}$ COSY |                            | NOESY <sup>b</sup> | $\delta_{\text{C}}$ | HMBC (C) <sup>c</sup> |
|-------------------|--------------------------------|------|--------------------------------------------------|----------------------------------|----------------------------|--------------------|---------------------|-----------------------|
| 2                 |                                |      |                                                  |                                  |                            |                    | 166.2 (s)           |                       |
| 3                 | 5.66                           | d    | 16.4 (4)                                         | 4                                | 5 $\beta$ , 9              |                    | 124.6 (d)           | 2, 5                  |
| 4                 | 6.83                           | ddd  | 16.4 (3), 10.8 (5 $\beta$ ), 6.0 (5 $\alpha$ )   | 3, 5 $\alpha$ , 5 $\beta$        | 6                          |                    | 145.2 (d)           | 2                     |
| 5 $\alpha$        | 2.53                           | ddd  | 13.2 (5 $\beta$ ), 6.0 (4), 1.8 (6)              | 4, 5 $\beta$                     | 15                         |                    | 40.0 (t)            | 3                     |
| 5 $\beta$         | 2.25                           | ddd  | 13.2 (5 $\alpha$ ), 12.6 (6), 10.8 (4)           | 4, 5 $\alpha$ , 6                | 3, 15                      |                    |                     | 3, 4, 6               |
| 6                 | 5.31                           | dqd  | 12.6 (5 $\beta$ ), 6.6 (15), 1.8 (5 $\alpha$ )   | 5 $\beta$ , 15                   | 4                          |                    | 69.9 (d)            |                       |
| 8                 |                                |      |                                                  |                                  |                            |                    | 169.0 (s)           |                       |
| 9                 | 3.59                           | d    | 3.6 (10)                                         | 10                               | 3, 1', 7'A                 |                    | 52.6 (d)            | 8, 11, 5', 6'         |
| 10                | 4.81                           | d    | 3.6 (9)                                          | 9                                | 12, S-CH <sub>3</sub> , 4' |                    | 52.4 (d)            | 8, 11, 2', 3'         |
| 11                |                                |      |                                                  |                                  |                            |                    | 208.0 (s)           |                       |
| 12                | 4.56                           | dd   | 9.0 (12-OH), 8.4 (13 $\alpha$ )                  | 13 $\alpha$ , 12-OH              | 10                         |                    | 75.1 (d)            | 11, 14                |
| 13 $\alpha$       | 1.93                           | ddd  | 15.0 (13 $\beta$ ), 8.4 (12), 2.4 (14)           | 12, 13 $\beta$                   | 16                         |                    | 37.3 (t)            | 11                    |
| 13 $\beta$        | 2.60                           | ddd  | 15.0 (13 $\alpha$ ), 11.4 (14), 1.2 (12)         | 13 $\alpha$ , 14                 | 16                         |                    |                     | 14                    |
| 14                | 5.25                           | dqd  | 11.4 (13 $\beta$ ), 6.6 (16), 2.4 (13 $\alpha$ ) | 13 $\beta$ , 16                  |                            |                    | 65.8 (d)            |                       |
| 15                | 1.40                           | d    | 6.6 (6)                                          | 6                                | 5 $\alpha$ , 5 $\beta$     |                    | 20.5 (q)            | 5, 6                  |
| 16                | 1.27                           | d    | 6.6 (14)                                         | 14                               | 13 $\alpha$ , 13 $\beta$   |                    | 20.3 (q)            | 13, 14                |
| 12-OH             | 3.31                           | br d | 9.0 (12)                                         | 12                               |                            |                    |                     |                       |
| 1'(NH)            | 5.84                           | s    |                                                  |                                  | 9, 9'                      |                    |                     | 3', 5', 6', 7'        |
| 2'                |                                |      |                                                  |                                  |                            |                    | 165.4 (s)           |                       |
| 3'                |                                |      |                                                  |                                  |                            |                    | 68.6 (s)            |                       |
| 4'(NH)            | 6.26                           | s    |                                                  |                                  | 10, S-CH <sub>3</sub> ,    |                    |                     | 6'                    |
| 5'                |                                |      |                                                  |                                  |                            |                    | 169.5 (s)           |                       |
| 6'                |                                |      |                                                  |                                  |                            |                    | 62.2 (s)            |                       |
| 7'A               | 2.99                           | d    | 14.4 (7'B)                                       | 7'B                              | 9, 9'                      |                    | 34.2 (t)            | 9, 5', 6', 8', 9'     |
| 7'B               | 3.56                           | d    | 14.4 (7'A)                                       | 7'A                              | 9'                         |                    |                     | 9, 5', 6', 8', 9'     |
| 8'                |                                |      |                                                  |                                  |                            |                    | 125.0 (s)           |                       |
| 9'                | 6.90                           | d    | 8.4 (10')                                        | 10'                              | 1', 7'A, 7'B               |                    | 131.6 (d)           | 7', 11'               |
| 10'               | 7.30                           | d    | 8.4 (9')                                         | 9'                               | 12'                        |                    | 115.6 (d)           | 8', 11'               |
| 11'               |                                |      |                                                  |                                  |                            |                    | 158.7 (s)           |                       |
| 12'               | 4.51                           | d    | 6.0 (13')                                        | 13'                              | 10', 16'                   |                    | 64.8 (t)            | 11', 13', 14'         |
| 13'               | 5.50                           | br t | 6.0 (12')                                        | 12'                              | 15'                        |                    | 119.5 (d)           | 16'                   |
| 14'               |                                |      |                                                  |                                  |                            |                    | 138.5 (s)           |                       |
| 15'               | 1.81                           | s    |                                                  |                                  | 13'                        |                    | 25.8 (q)            | 13', 14', 16'         |
| 16'               | 1.76                           | s    |                                                  |                                  | 12'                        |                    | 18.2 (q)            | 13', 14', 15'         |
| S-CH <sub>3</sub> | 2.34                           | s    |                                                  |                                  | 10, 4'                     |                    | 12.4 (q)            | 3'                    |

a  $^1\text{H}$  chemical shift values ( $\delta$  ppm from SiMe<sub>4</sub>) followed by multiplicity and then the coupling constants ( $J$ /Hz). Figures in parentheses indicate the proton coupling with that position. b The correlations with geminal and vicinal protons are removed. c Long range  $^1\text{H}$ - $^{13}\text{C}$  correlations from H to C observed in the HMBC experiment.

Table S2 NMR spectral data of **3** in MeOH-*d*<sub>4</sub>

| Position    | $\delta_{\text{H}}^{\text{a}}$ | <i>J</i> /Hz                                    | <sup>1</sup> H- <sup>1</sup> H COSY | NOESY <sup>b</sup>     | $\delta_{\text{C}}$ | HMBC (C) <sup>c</sup> |
|-------------|--------------------------------|-------------------------------------------------|-------------------------------------|------------------------|---------------------|-----------------------|
| 2           |                                |                                                 |                                     |                        | 166.9 (s)           |                       |
| 3           | 5.78 d                         | 16.2 (4)                                        | 4                                   | 5 $\alpha$             | 126.8 (d)           | 2, 5                  |
| 4           | 6.68 ddd                       | 16.4 (3), 12.0 (5 $\alpha$ ), 4.2 (5 $\beta$ )  | 3, 5 $\alpha$ , 5 $\beta$           | 6                      | 146.0 (d)           | 2, 5                  |
| 5 $\alpha$  | 2.27 ddd                       | 13.2 (5 $\beta$ ), 12.0 (4), 12.0 (6)           | 4, 5 $\beta$ , 6                    | 3, 15                  | 42.0 (t)            | 3, 4, 6, 15           |
| 5 $\beta$   | 2.58 ddd                       | 13.2 (5 $\alpha$ ), 4.2 (6), 4.2 (4)            | 4, 5 $\alpha$                       | 15                     |                     |                       |
| 6           | 5.29 dqd                       | 12.0 (5 $\alpha$ ), 6.0 (15), 4.2 (5 $\beta$ )  | 5 $\alpha$ , 15                     | 4                      | 70.1 (d)            |                       |
| 8           |                                |                                                 |                                     |                        | 167.8 (s)           |                       |
| 9           | 6.08 dd                        | 15.6 (10), 0.6 (11)                             | 10                                  | 11, 5'                 | 125.2 (d)           | 8, 11                 |
| 10          | 6.77 dd                        | 15.6 (9), 6.0 (11)                              | 9, 11                               | 12, 13 $\alpha$        | 147.2 (d)           | 8, 9, 11              |
| 11          | 3.96 ddd                       | 9.0 (12), 6.0 (11), 0.6 (9)                     | 10, 12                              | 9, 13 $\alpha$ , 1'    | 83.8 (d)            | 9, 10, 12, 1'         |
| 12          | 3.76 ddd                       | 9.0 (11), 6.6 (13 $\beta$ ), 1.2 (13 $\alpha$ ) | 13 $\beta$                          | 10, 16                 | 72.6 (d)            | 10, 11, 13, 14        |
| 13 $\alpha$ | 1.92 dd                        | 16.2 (13 $\beta$ ), 4.2 (14)                    | 14, 13 $\beta$                      | 10, 11                 | 37.1 (t)            | 11, 14, 16            |
| 13 $\beta$  | 1.48 ddd                       | 16.2 (13 $\alpha$ ), 6.6 (12), 2.4 (14)         | 12, 13 $\alpha$                     | 16                     |                     | 12                    |
| 14          | 5.13 qdd                       | 6.6 (16), 4.2 (13 $\alpha$ ), 2.4 (13 $\beta$ ) | 13 $\alpha$ , 16                    |                        | 69.7 (d)            | 12                    |
| 15          | 1.36 d                         | 6.0 (6)                                         | 6                                   | 5 $\alpha$ , 5 $\beta$ | 20.6 (q)            | 5, 6                  |
| 16          | 1.33 d                         | 6.6 (14)                                        | 14                                  | 12, 13 $\beta$         | 18.4 (q)            | 13, 14                |
| 1'          | 5.00 d                         | 3.6 (2')                                        | 2'                                  | 11                     | 102.9 (d)           | 11, 2', 5'            |
| 2'          | 3.43 dd                        | 9.6 (3'), 3.6 (1')                              | 1', 3'                              | 4'                     | 73.9 (d)            | 3'                    |
| 3'          | 3.67 dd                        | 9.6 (2'), 9.6 (4')                              | 2', 4'                              | 5'                     | 75.1 (d)            | 2', 4', 5'            |
| 4'          | 3.34 dd                        | 10.2 (5'), 9.6 (3')                             | 3', 5'                              | 2', 6'                 | 71.4 (d)            | 3', 5', 6'            |
| 5'          | 3.55 dt                        | 10.2 (4'), 3.6 (6')                             | 4', 6'                              | 9, 3'                  | 74.3 (d)            |                       |
| 6'          | 3.64 d                         | 3.6 (5')                                        | 5'                                  | 4'                     | 62.1 (t)            | 4', 5'                |

a <sup>1</sup>H chemical shift values ( $\delta$  ppm from SiMe<sub>4</sub>) followed by multiplicity and then the coupling constants (*J*/Hz). Figures in parentheses indicate the proton coupling with that position. b The correlations with geminal and vicinal protons are removed. c Long range <sup>1</sup>H-<sup>13</sup>C correlations from H to C observed in the HMBC experiment.

**Figure S1 14-membered macrodiolides associated to halosmysins**

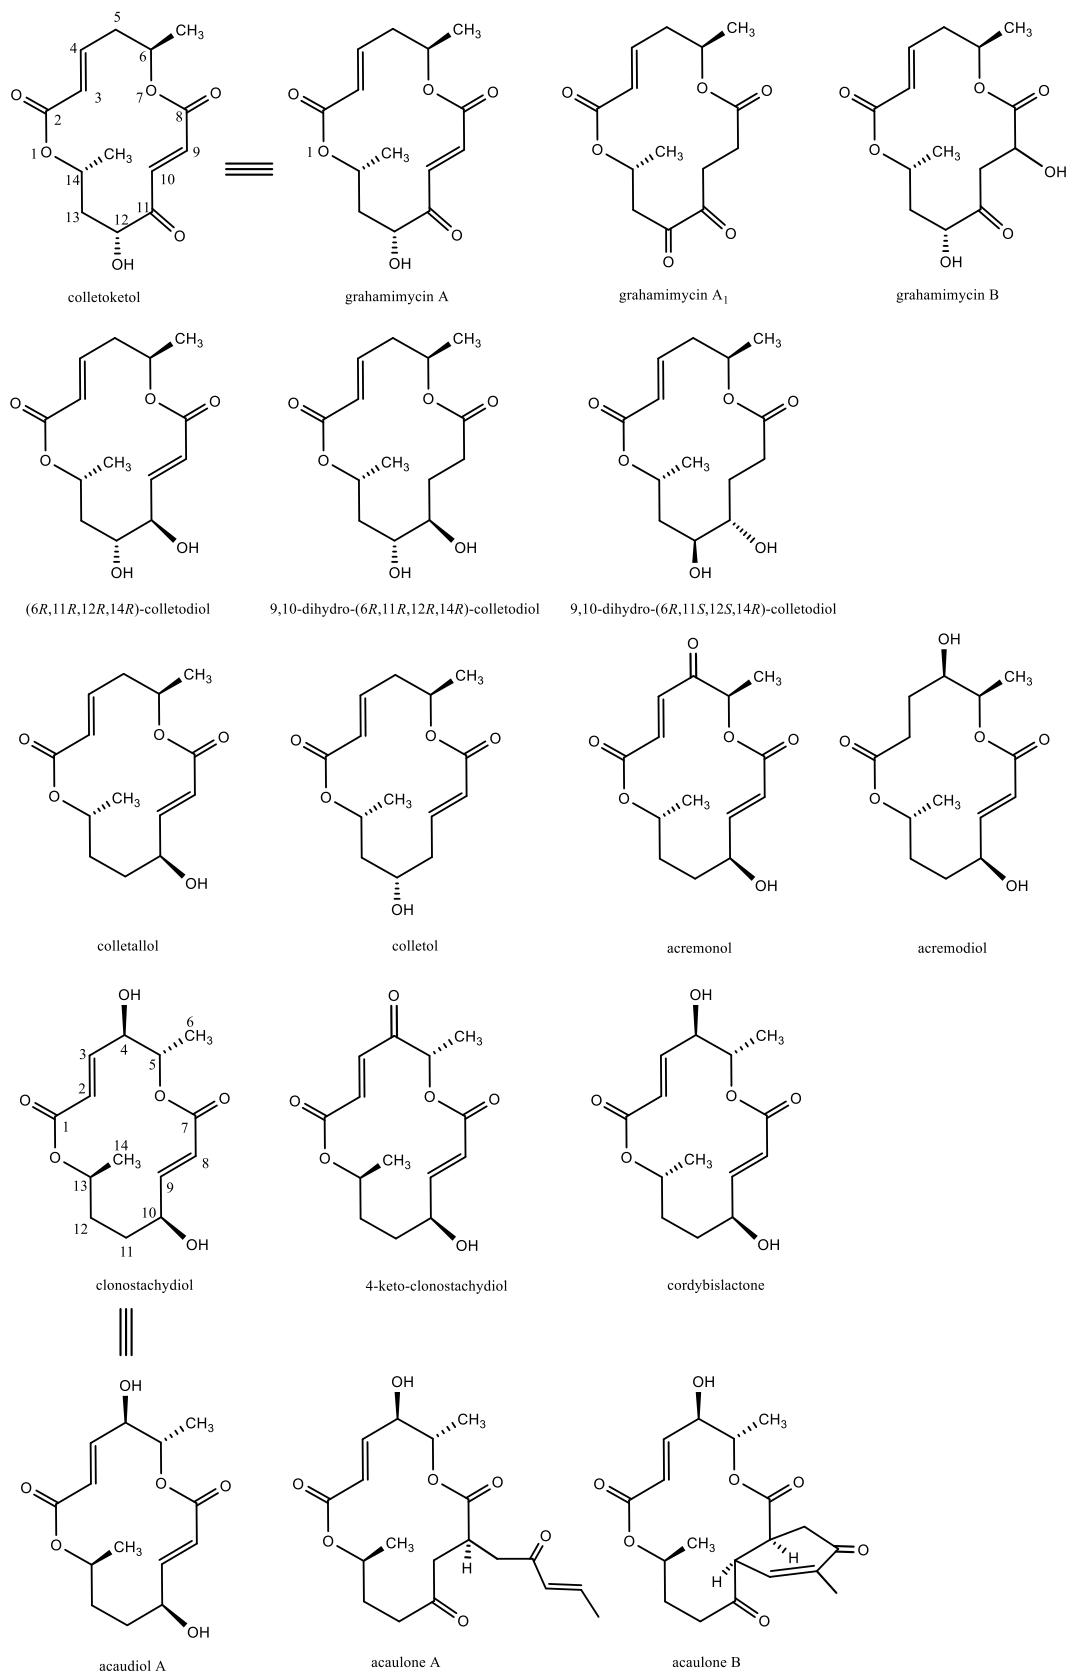

Figure S2  $^1\text{H}$  NMR spectrum of 2 in  $\text{CDCl}_3$

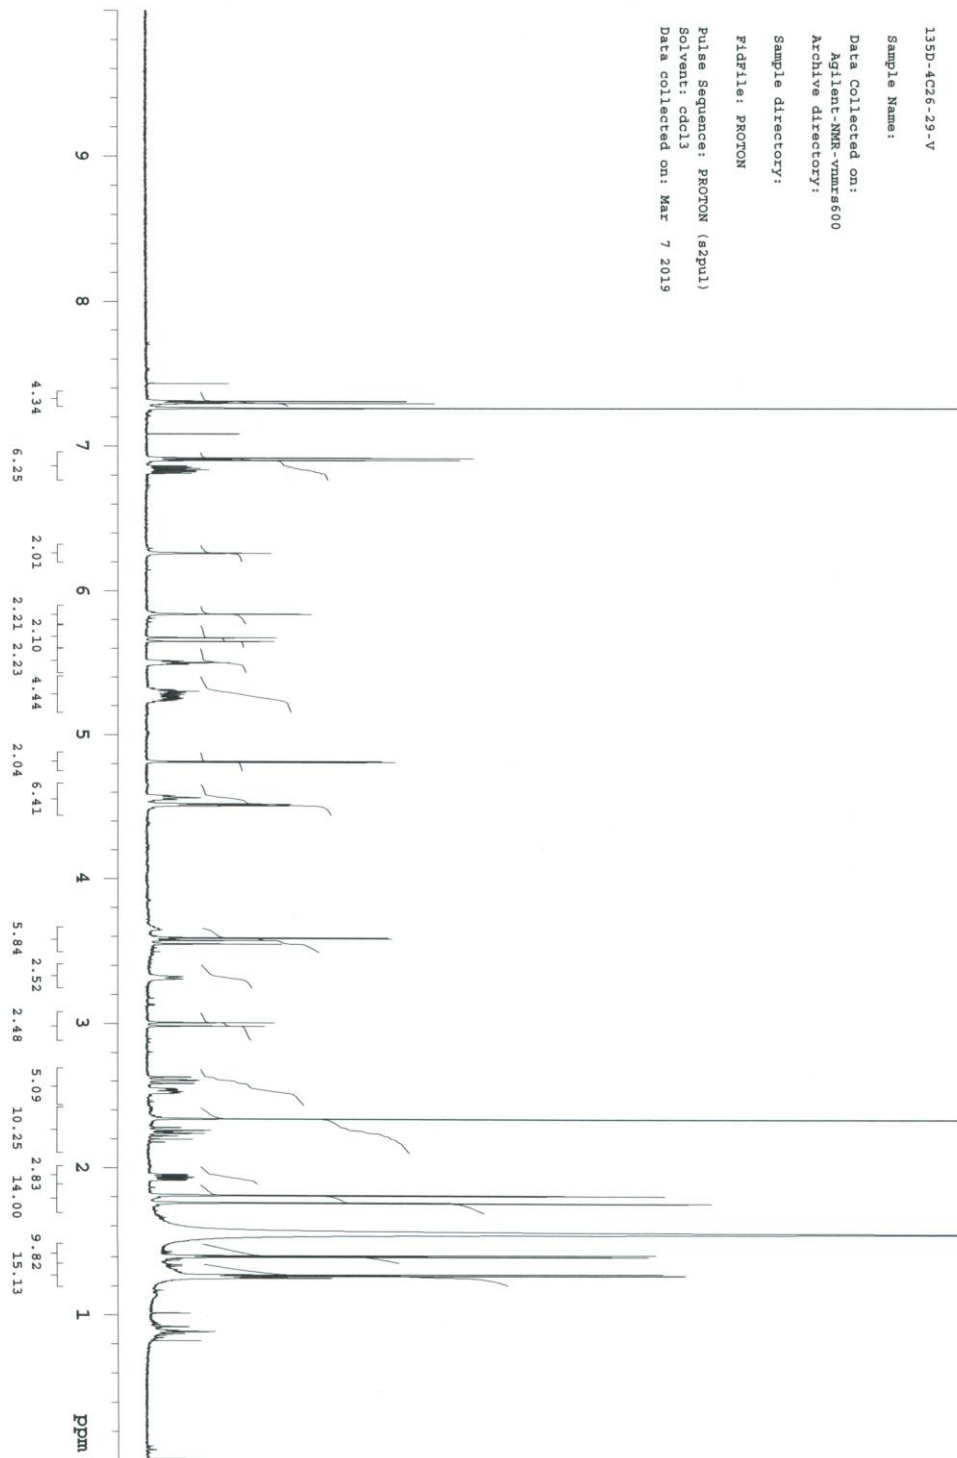

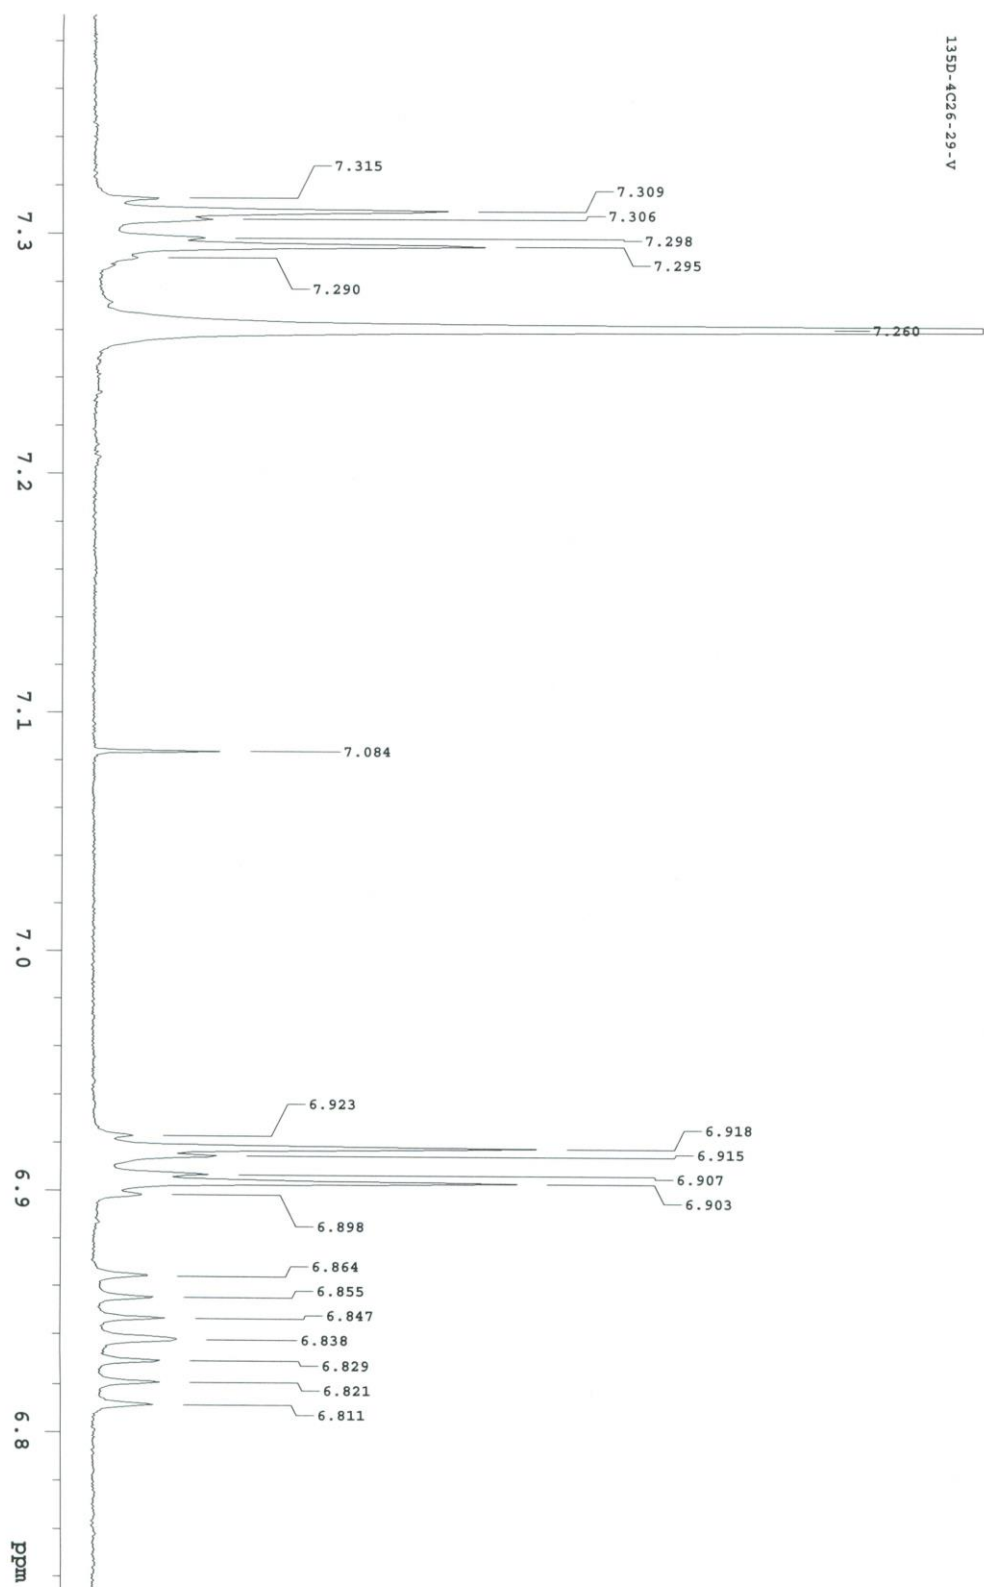

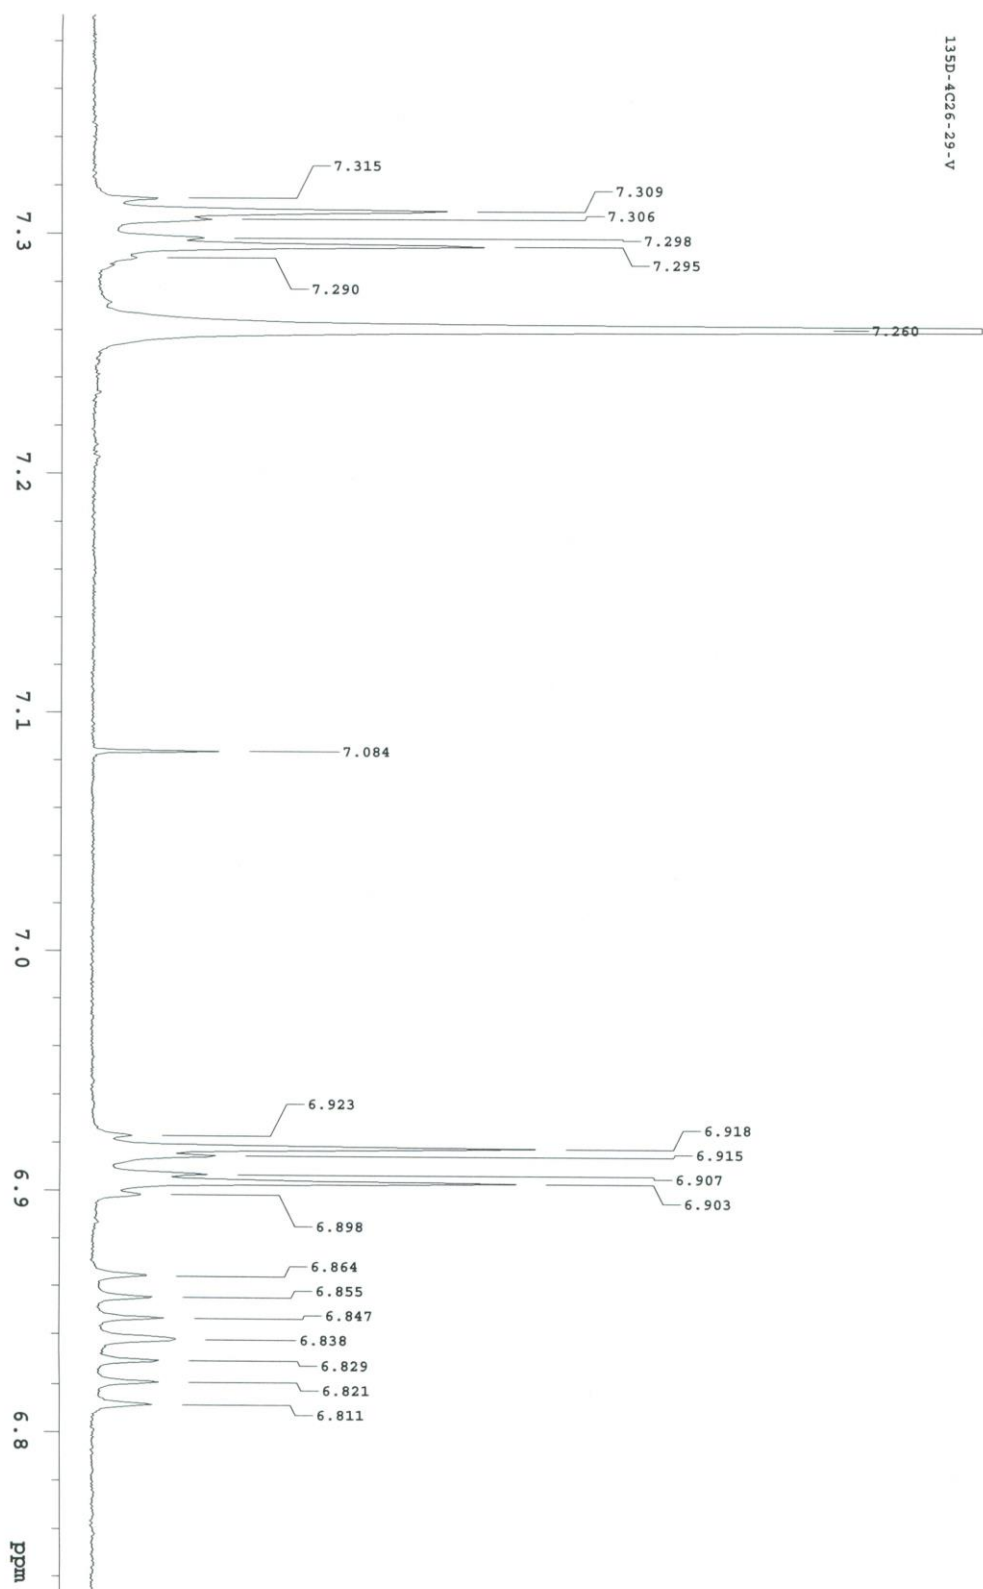

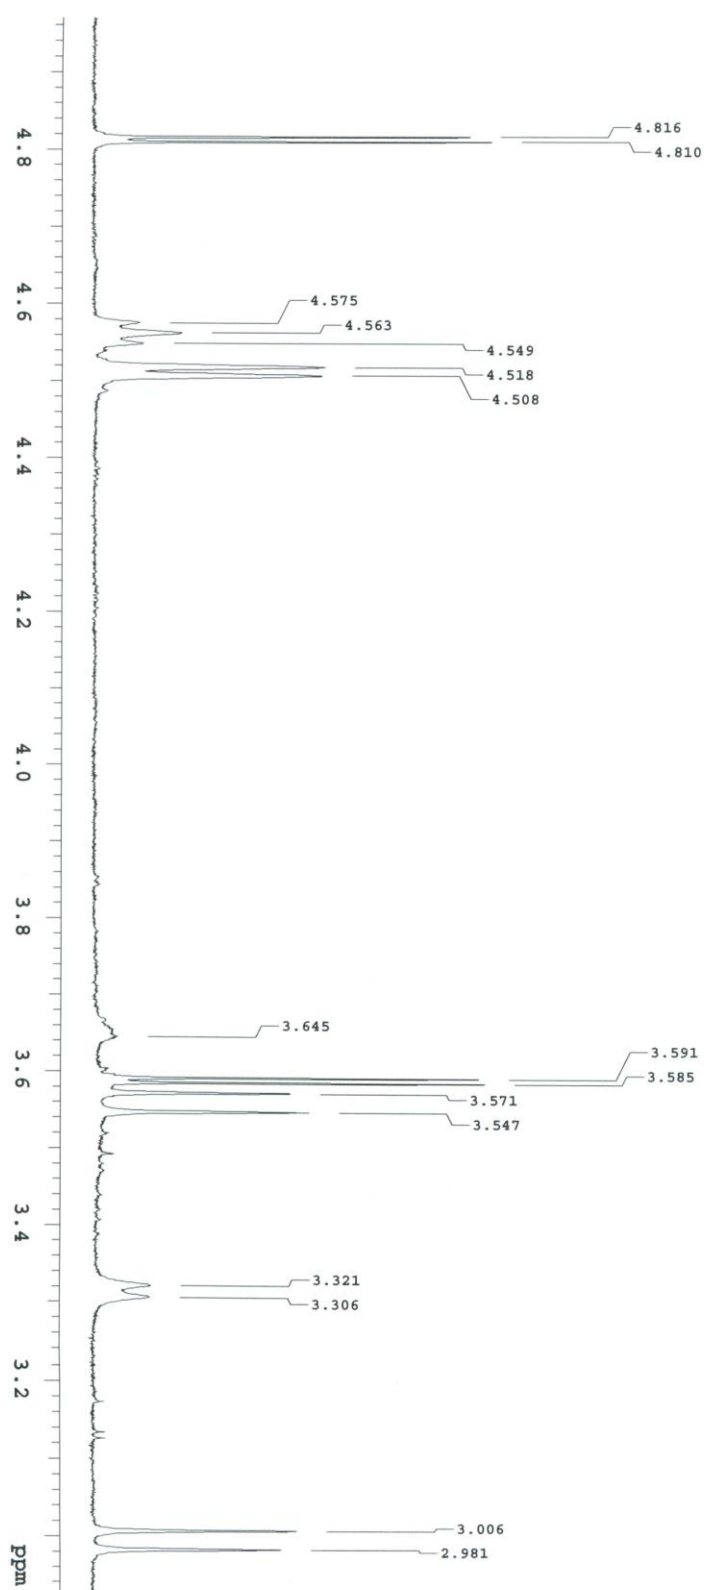



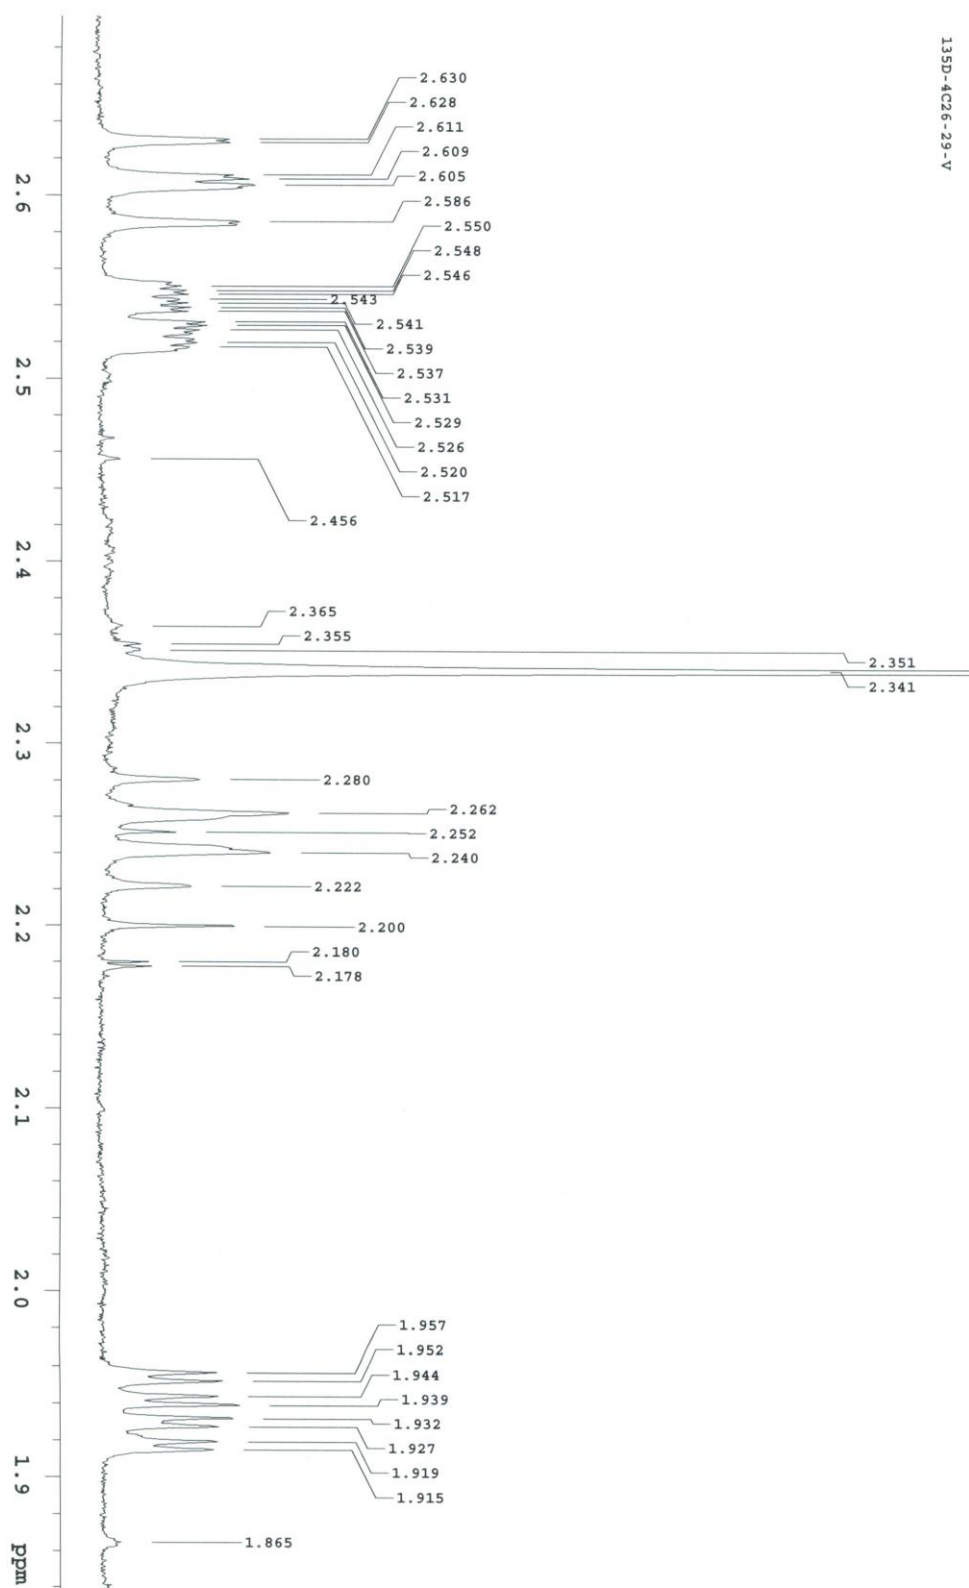

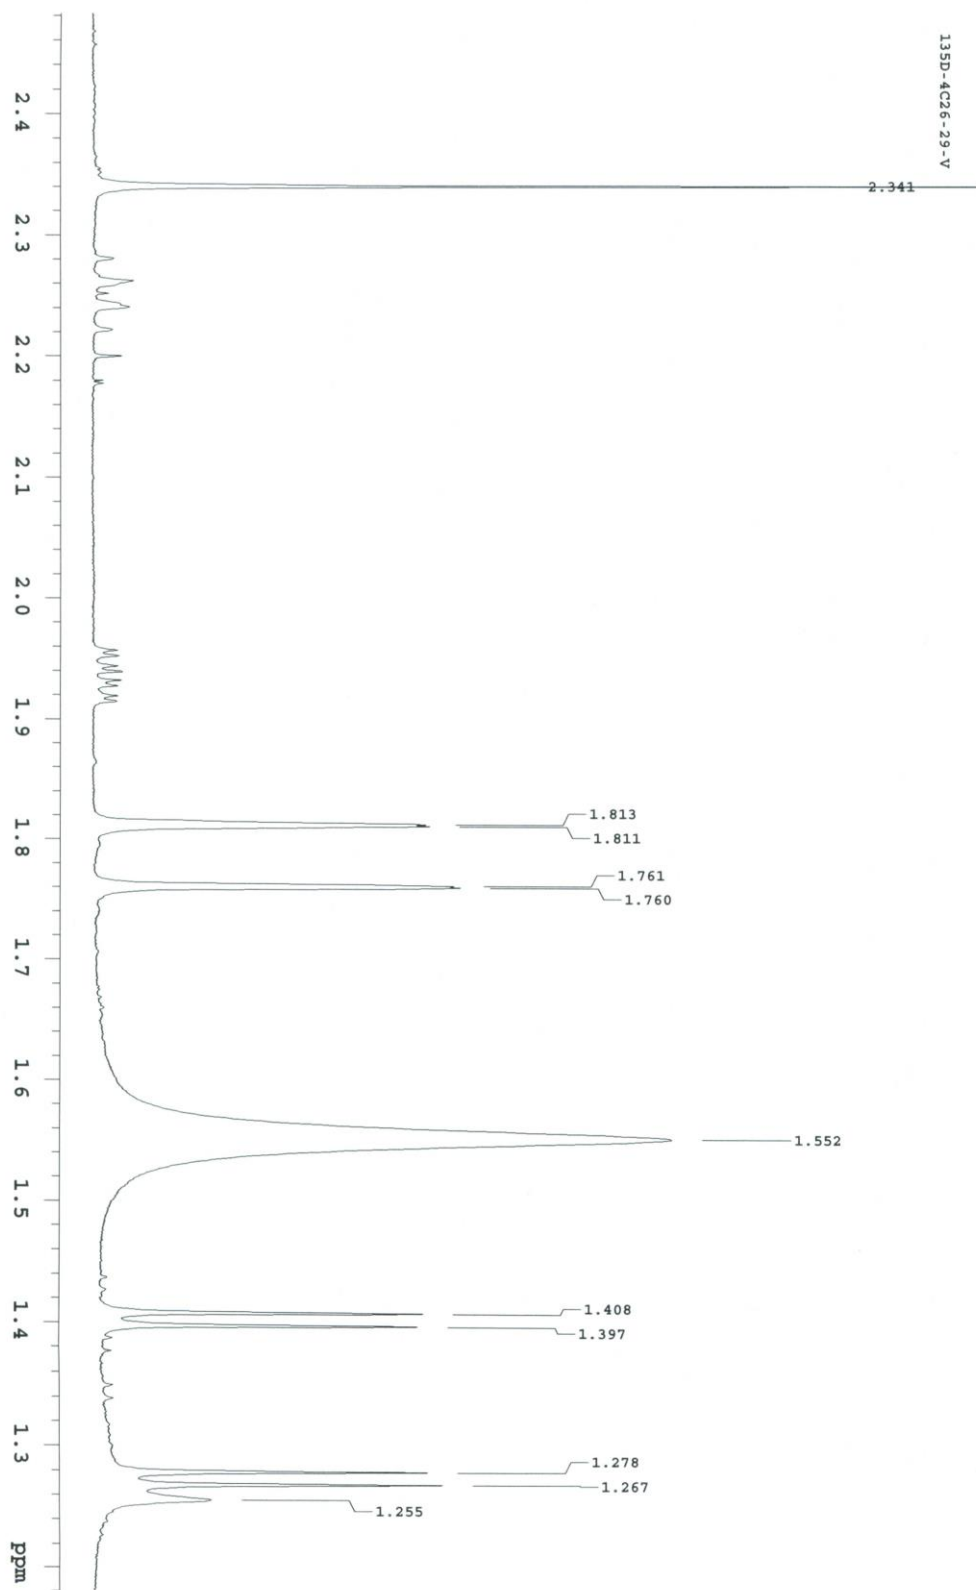

Figure S3  $^{13}\text{C}$  NMR spectrum of 2 in  $\text{CDCl}_3$

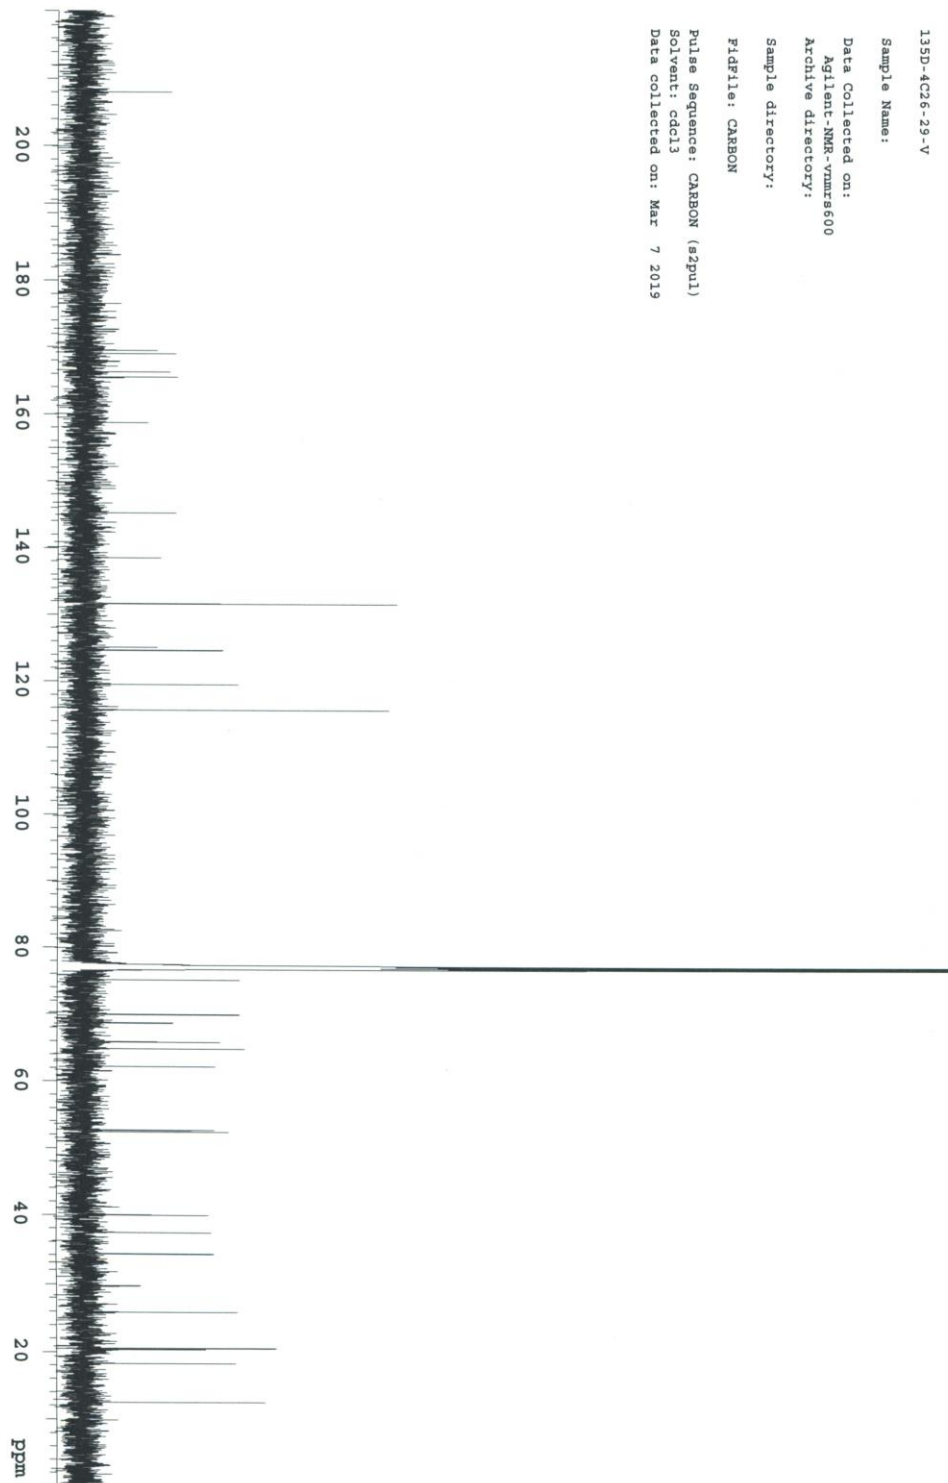

| 13D-4C26-29-V |           |         |        |
|---------------|-----------|---------|--------|
| INDEX         | FREQUENCY | PPM     | HEIGHT |
| 1             | 3170.5    | 207.967 | 15.1   |
| 2             | 28865.5   | 191.360 | -7.6   |
| 3             | 25561.7   | 169.458 | 12.5   |
| 4             | 25486.6   | 168.960 | 15.8   |
| 5             | 25069.3   | 166.194 | 14.9   |
| 6             | 24956.0   | 165.443 | 16.2   |
| 7             | 23937.6   | 158.691 | 10.9   |
| 8             | 23366.6   | 154.906 | -6.9   |
| 9             | 21899.6   | 145.181 | 15.8   |
| 10            | 21126.3   | 140.054 | -7.0   |
| 11            | 20891.6   | 138.498 | 13.2   |
| 12            | 19848.9   | 131.586 | 55.4   |
| 13            | 18862.9   | 125.049 | 12.5   |
| 14            | 18795.9   | 124.605 | 24.3   |
| 15            | 18021.4   | 119.470 | 27.0   |
| 16            | 17441.1   | 115.623 | 54.0   |
| 17            | 11646.2   | 77.207  | 3903.0 |
| 18            | 11615.0   | 77.000  | 4264.6 |
| 19            | 11582.6   | 76.785  | 4182.1 |
| 20            | 11324.8   | 75.077  | 27.4   |
| 21            | 10591.9   | 70.218  | -6.6   |
| 22            | 10541.1   | 69.881  | 27.3   |
| 23            | 10351.5   | 68.624  | 15.5   |
| 24            | 9928.4    | 65.819  | 23.5   |
| 25            | 9777.0    | 64.815  | 28.3   |
| 26            | 9315.9    | 62.156  | 23.0   |
| 27            | 7939.0    | 52.631  | 22.9   |
| 28            | 7902.0    | 52.385  | 25.5   |
| 29            | 6028.2    | 39.963  | 21.9   |
| 30            | 5631.7    | 37.335  | 22.4   |
| 31            | 5154.3    | 34.170  | 22.9   |
| 32            | 4977.4    | 32.997  | -6.4   |
| 33            | 4479.2    | 29.694  | 9.9    |
| 34            | 3896.6    | 25.832  | 27.1   |
| 35            | 3088.6    | 20.475  | 34.0   |
| 36            | 3059.7    | 20.284  | 21.4   |
| 37            | 2748.7    | 18.222  | 26.7   |
| 38            | 1871.3    | 12.406  | 32.0   |

13SD-4C26-29-V

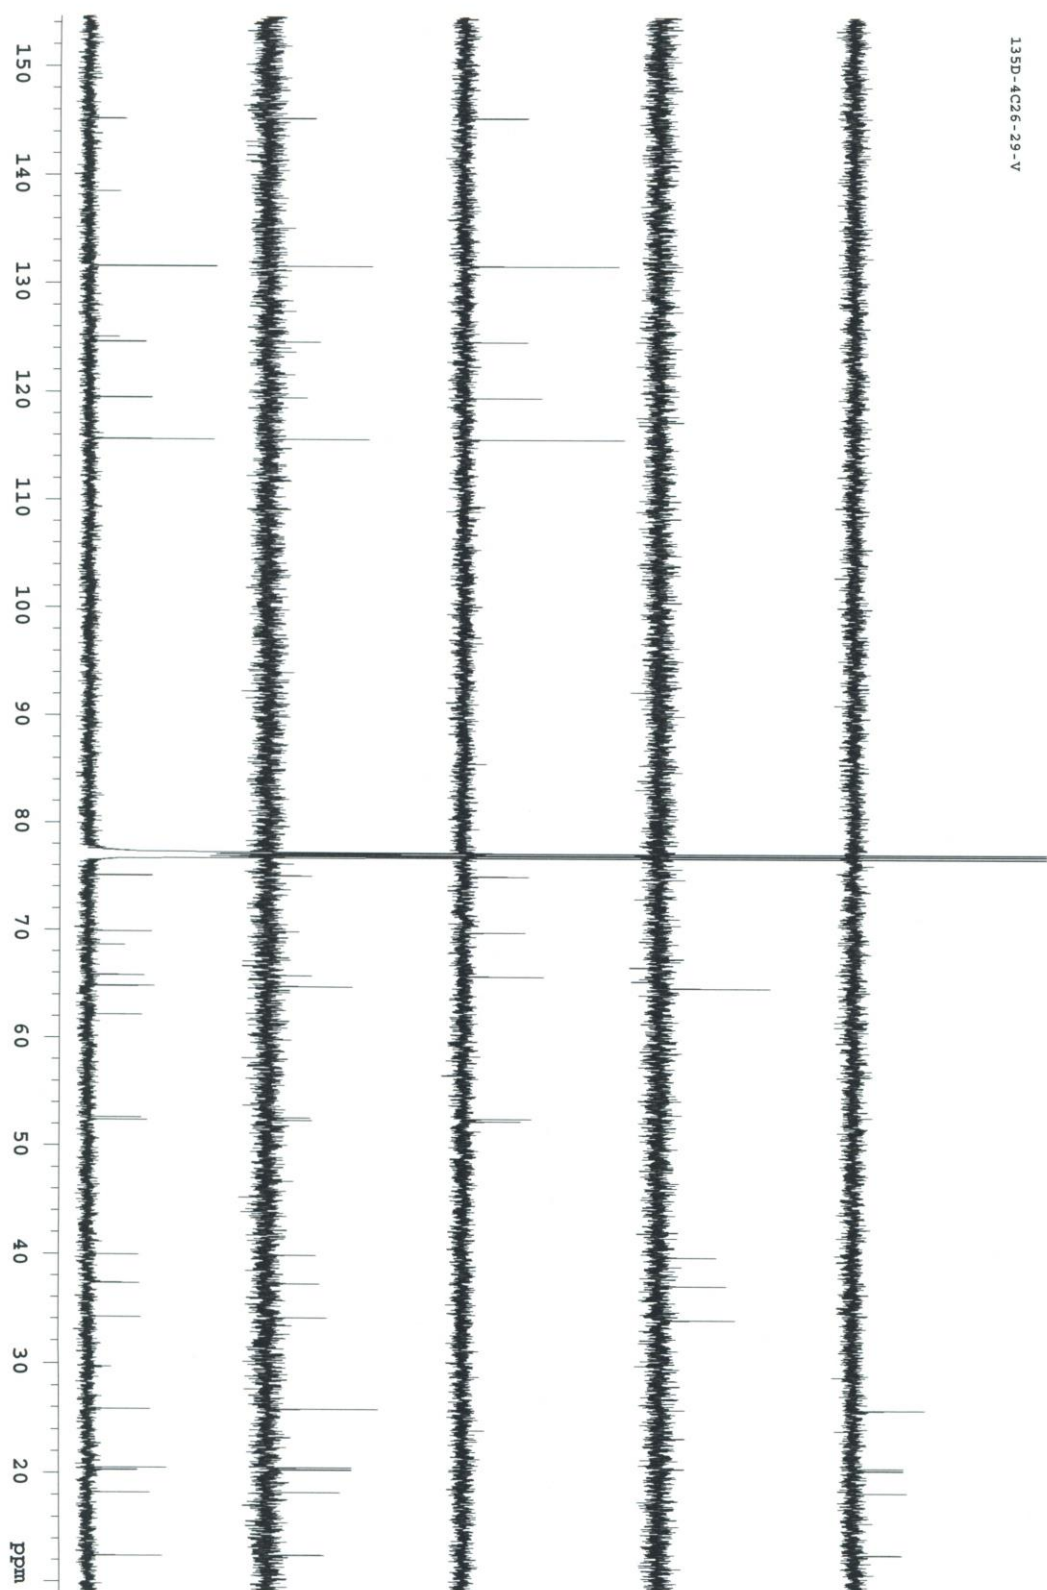

Figure S4  $^1\text{H}$ - $^1\text{H}$  COSY of 2

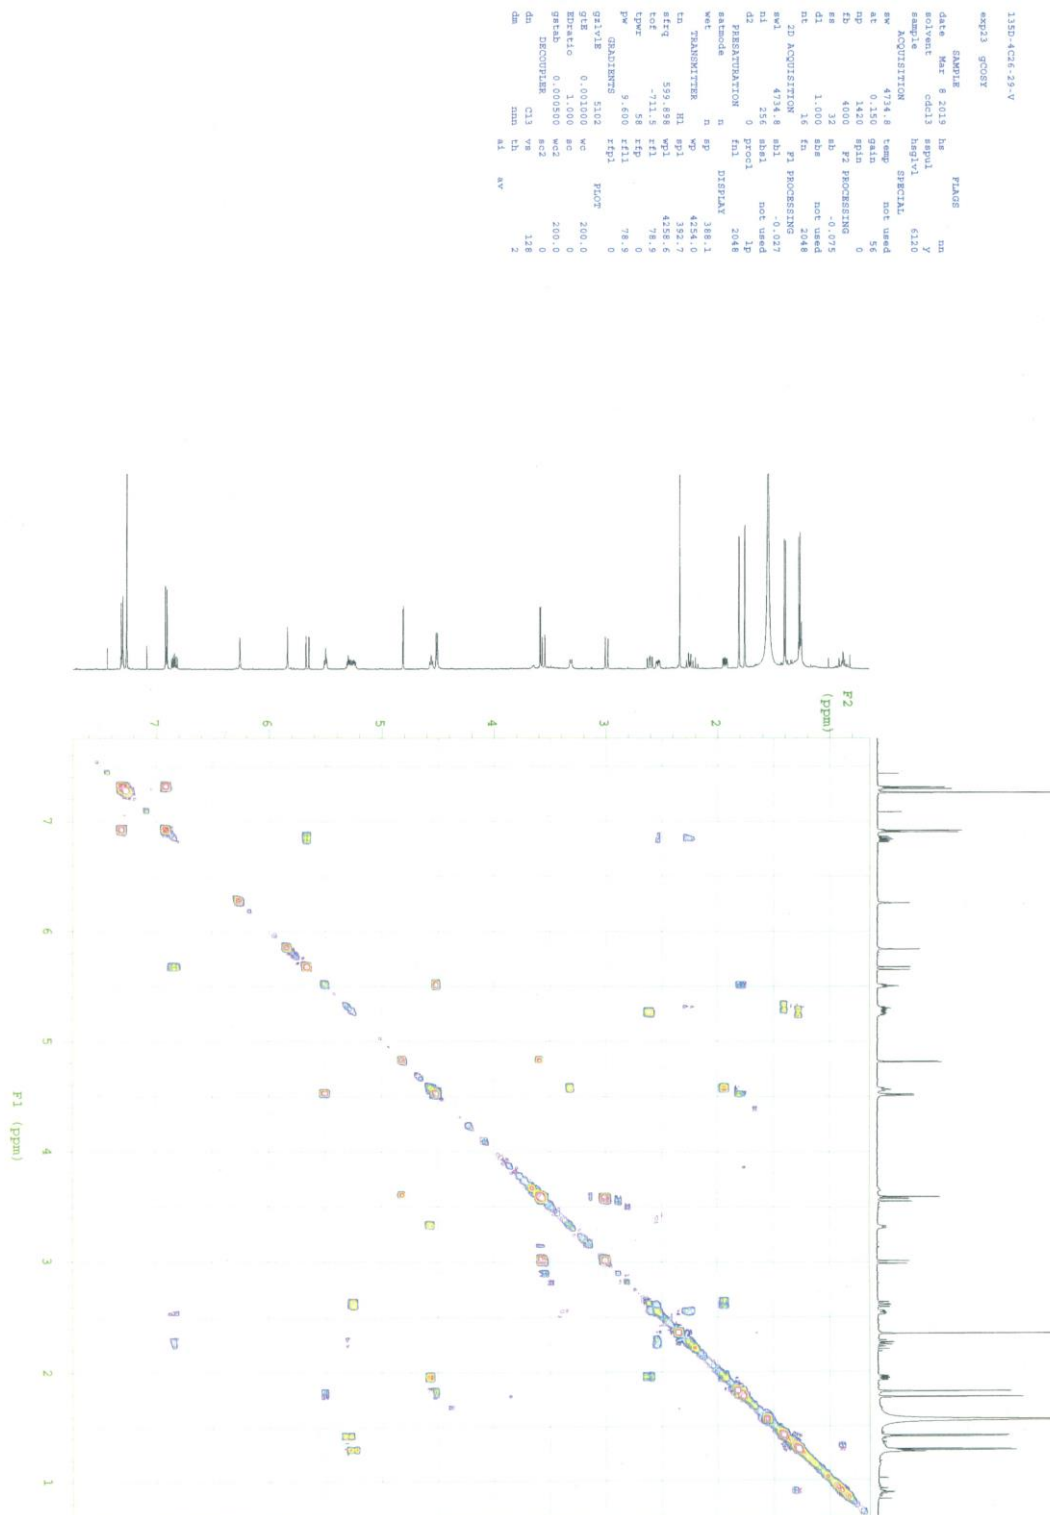



exp23 gcosx

[illegible]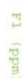



**Figure S5 NOESY of 2**

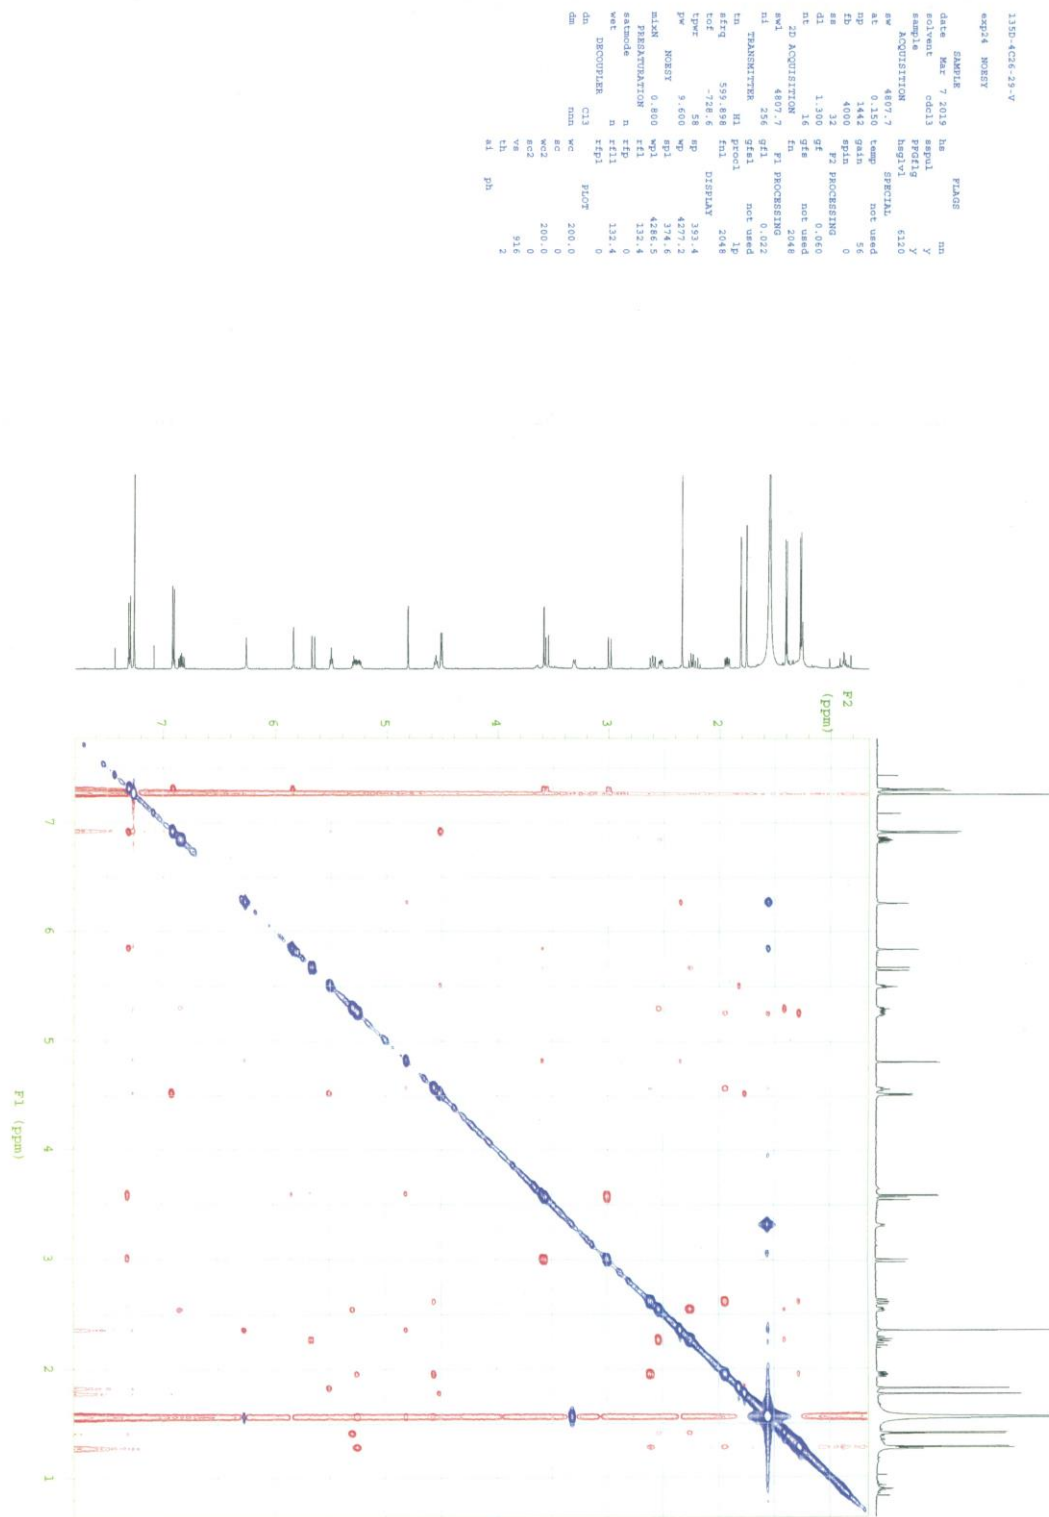

exp24 NOESY

exp24 NOESY

| DATE           | FILE    | FLAGS   | nm               |
|----------------|---------|---------|------------------|
| Mar 7 2015     | hs      |         |                  |
| sample         | cdcl3   | spul    | y                |
|                |         | poft    | y                |
| ACQUISITION    | hsq11   | 6110    |                  |
| 4607.7         |         | SPECTAL |                  |
| at             | 0.150   | temp    | not used         |
| dp             | 1442    | gain    | 56               |
| td             | 4000    | sp      |                  |
| sc             | 12      | f2      | PROCESSING 0     |
| ds             | 1.300   | se      | 0.060            |
| nt             | 1442    | gfe     | not used         |
| 2D ACQUISITION |         |         |                  |
| sw1            | 4607.7  | p1      | PROCESSING 0.032 |
| al             | 256     | gfe1    | not used         |
| tn             | hl      | pref1   | 1p               |
| rfc            | 559.886 |         |                  |
| tdc            | -728.6  |         |                  |
| type           | 56      | sp      | 2867.2           |
| nmey           | 9.600   | wp1     | 2000.1           |
|                |         | wp2     | 664.9            |
| mlsn           | 0.800   | wp3     | 3925.0           |
| PRESAMPLATION  |         | rf1     | 133.4            |
| salmodc        | n       | rf2     | 0                |
| wet            | n       | rf11    | 133.4            |
| DECOUPLER      |         | rfp1    | 0                |
| dm             | cl13    |         |                  |
| nm             | wc      |         | 256.0            |
| sc             | 0       |         |                  |
| wd             | 200.0   |         |                  |
| sc2            | 0       |         |                  |
| vs             | 516     |         |                  |
| th             | 2       |         |                  |
| ph             |         |         |                  |

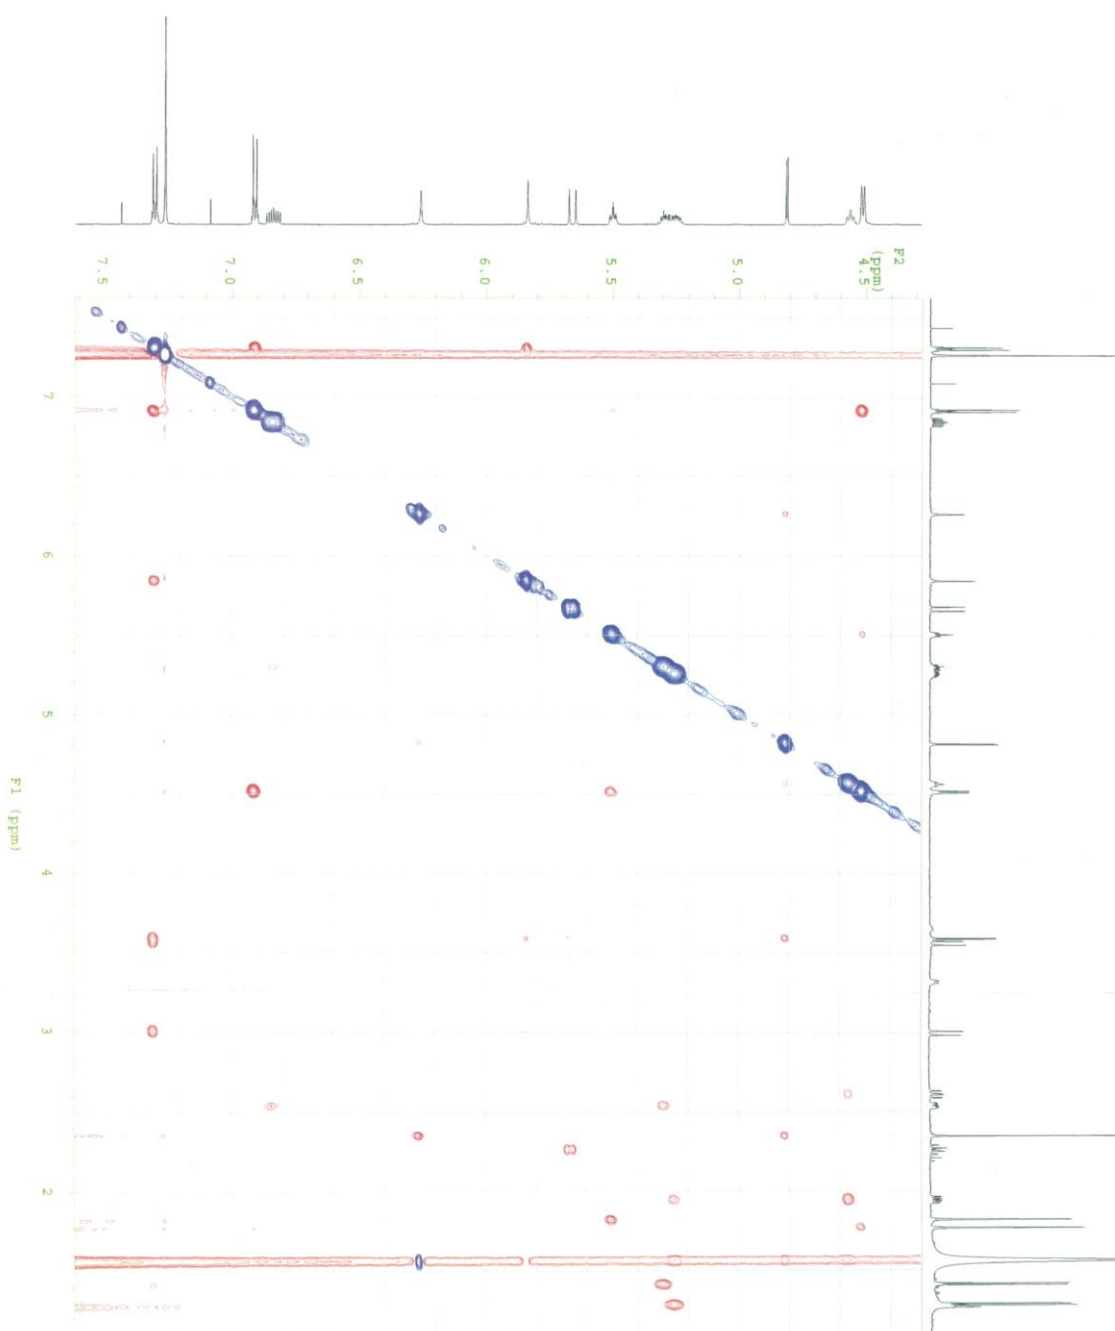

135D-4C76-28-V

exp24 NOSEY

| SAMPLE    |             | FLAGS  |           |
|-----------|-------------|--------|-----------|
| date      | Mar 7 2019  | hs     | nm        |
| solvent   | cdcl3       | sepol  | y         |
| sample    |             | proc1g | y         |
| acq1      | 4897.7      | hqv1g  | 6120      |
| acq2      | 4897.7      | spc1g  | 6120      |
| at        | 0.110       | temp   | not used  |
| nd        | 1443        | gals   | 56        |
| fb        | 4000        | sp1g   | 0         |
| ss        | 32          | f2     | PROCESSED |
| d1        | 1.300       | g2     | 0.060     |
| nt        | 16          | gfs    | not used  |
| 2d        | 4897.7      | fz     | 2048      |
| sw1       | 256         | g1     | 0.022     |
| ni        | TRANSMITTER | gfs1   | not used  |
| tn        | 559.888     | fm1    | 2048      |
| rtq       | -7.288      | sp     | 2571.9    |
| lwr       | 9.600       | wp1    | 1981.3    |
| pw        | NOSEY       | wp2    | 668.7     |
| mln       | 0.800       | wp1    | 1572.8    |
| presat    | 0.800       | wp2    | 132.4     |
| satmode   | n           | rfp    | 0         |
| wet       | n           | rf1    | 132.4     |
| decoupler | cl3         | rfp1   | 0         |
| dm        | nm          | wc     | 250.0     |
| hc        | 0           | wc2    | 200.0     |
| vc2       | 0           | vc2    | 916       |
| lb        | 2           | at     | ph        |

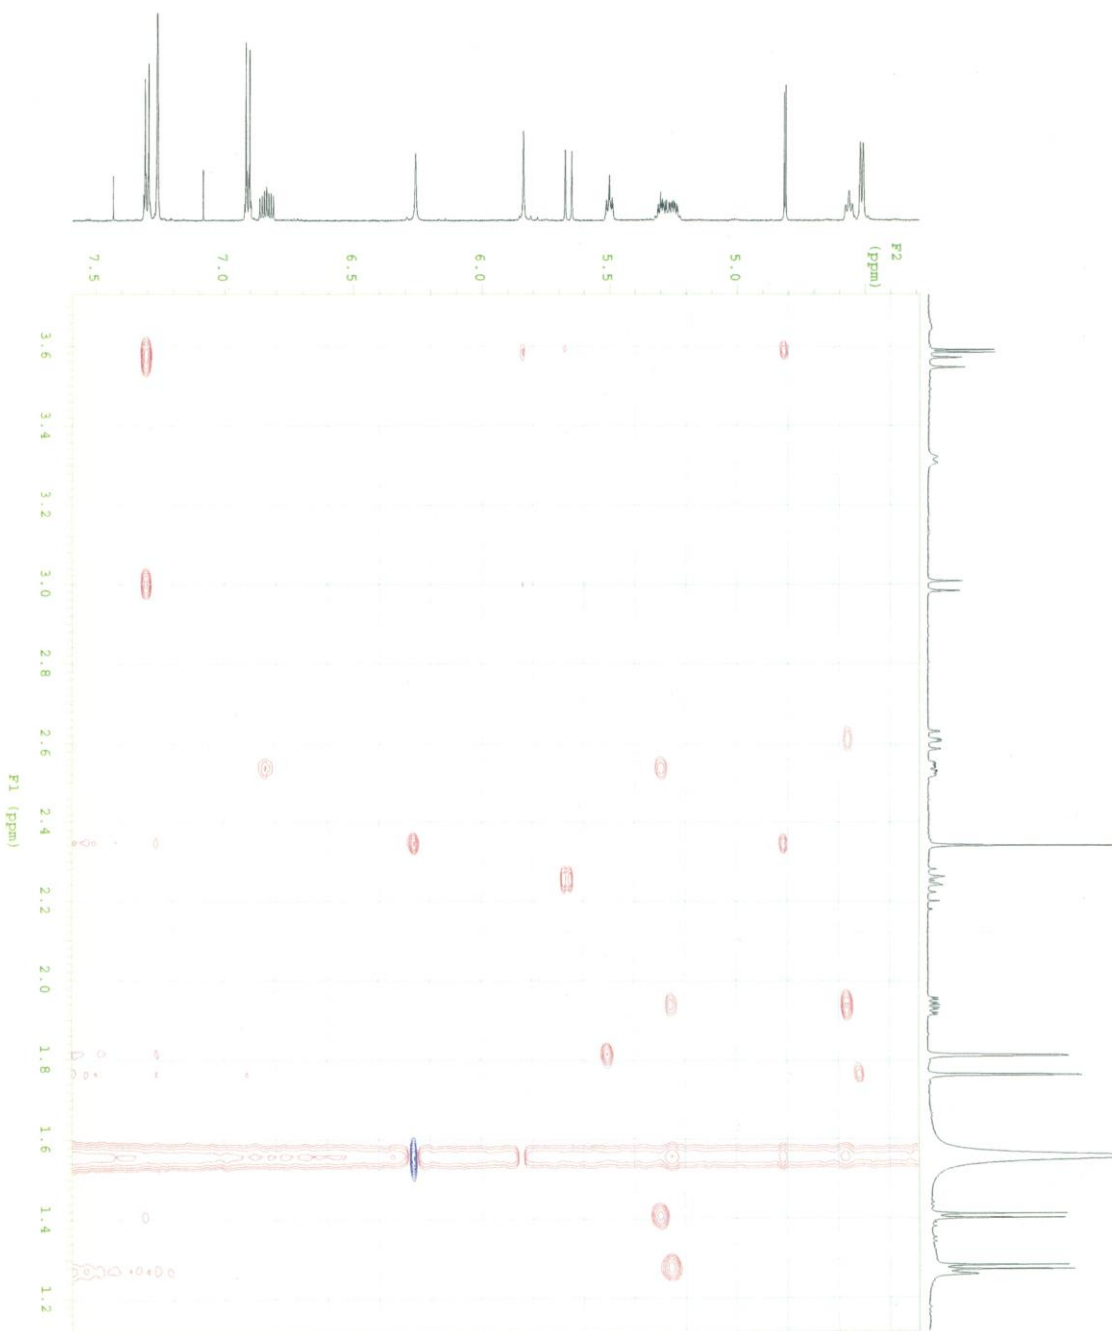

**Figure S6 HMQC of 2**

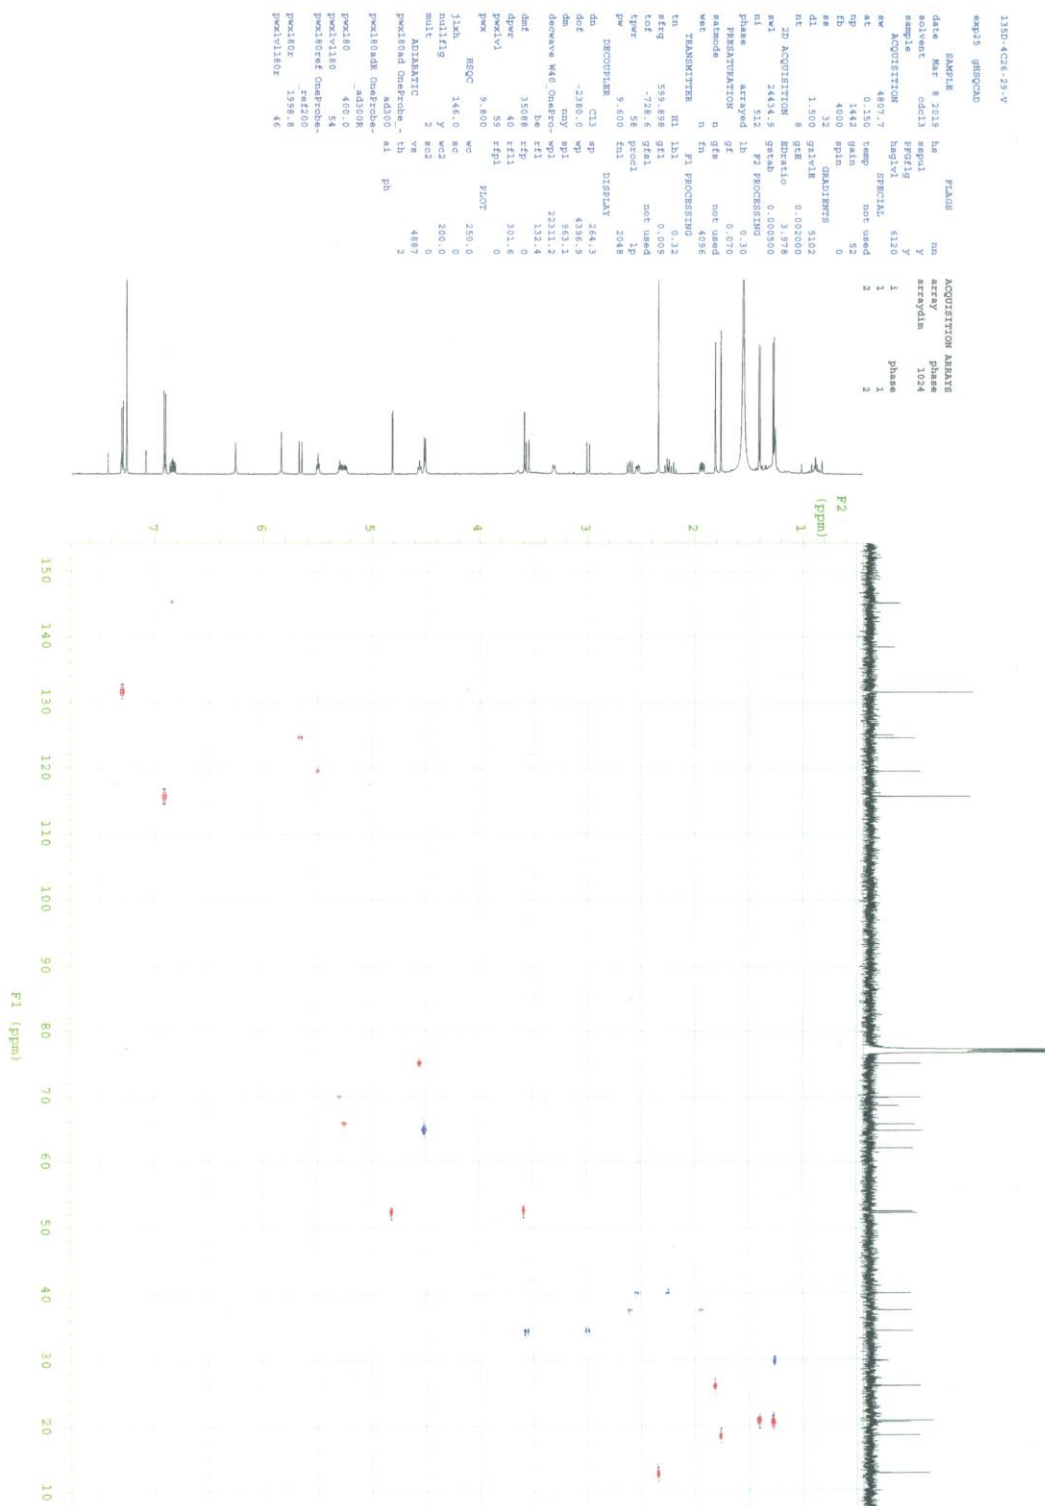

113D-4C26-28-V

exp25 SHOCAD

SAMPLE Mar 8 2019 ha  
 solvent cdcl3 specul  
 sample y  
 ACQUISITION 107.7  
 at 0.110 temp SPECIAL 6120  
 th 1442 gals not used 1  
 sp 4000 spins 52 2  
 as 32 GRADIENTS 0  
 d1 1.500 g1v1e 5102  
 nt 8 g1e 0.002000  
 2D ACQUISITION ED-ratio 3.378  
 w1 24434.9 g1ab 0.000500  
 n1 512 F2 PROCESSING  
 phase arrayed 1b 0.10  
 PREPARATION g1e 0.170  
 BIRDGE n g1e not used  
 w1 1000 spins 52  
 THINNING n 1b1 0.12  
 efq 599.898 g1i 0.005  
 tot -728.6 g1e1 not used  
 lpr 58 proc1 1p  
 pw 9.600 fml 2048  
 DECOUPLER C13 EP DISPLAY 510.8  
 d0 -2380.0 wp 1673.0  
 dm 1673.0  
 decouple w10 OnePfc-wp1 4531.8  
 dnt 35048 f1i 121.4  
 dpr 40 f1i 301.6  
 pw1v1 59 f1i 0  
 pxc 9.800 F2OT 280.0  
 j1ch 146.0 mc 0  
 nullf1g y wc2 200.0  
 mult 2 sc2 0  
 ADJNATYC vs 4887  
 pw1f0ad OnePfc-lb ph 2  
 pw1f0ad OnePfc-  
 pw1f0 -adion  
 pw1v1180 40034  
 pw1f0e OnePfc-  
 pw1f0e -ref200  
 pw1f0e -1988.8  
 pw1v1180r 46

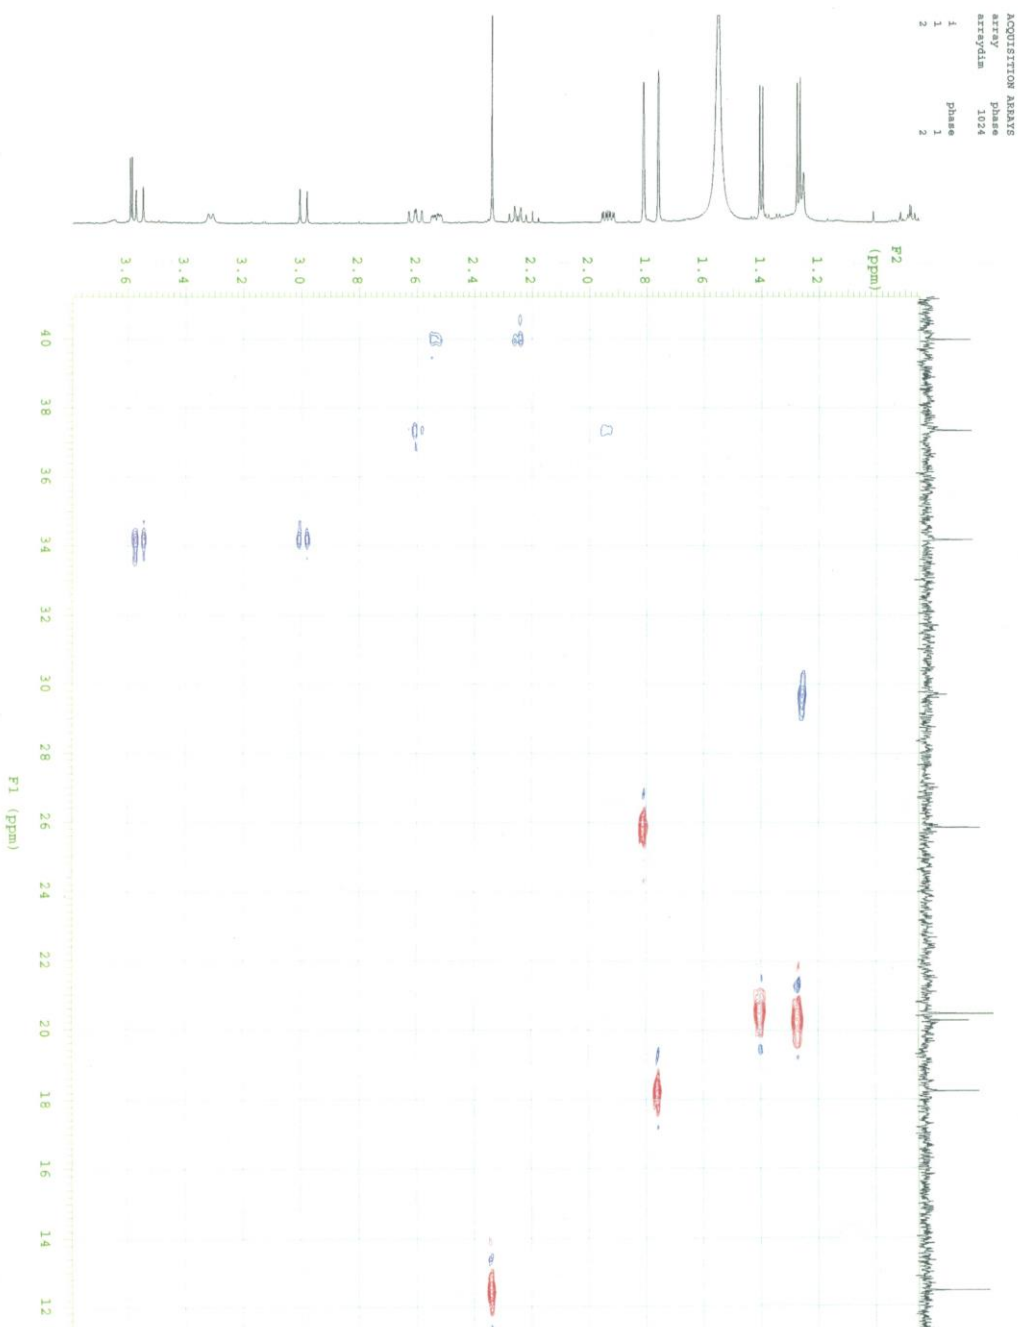

**Figure S7 HMBC of 2**

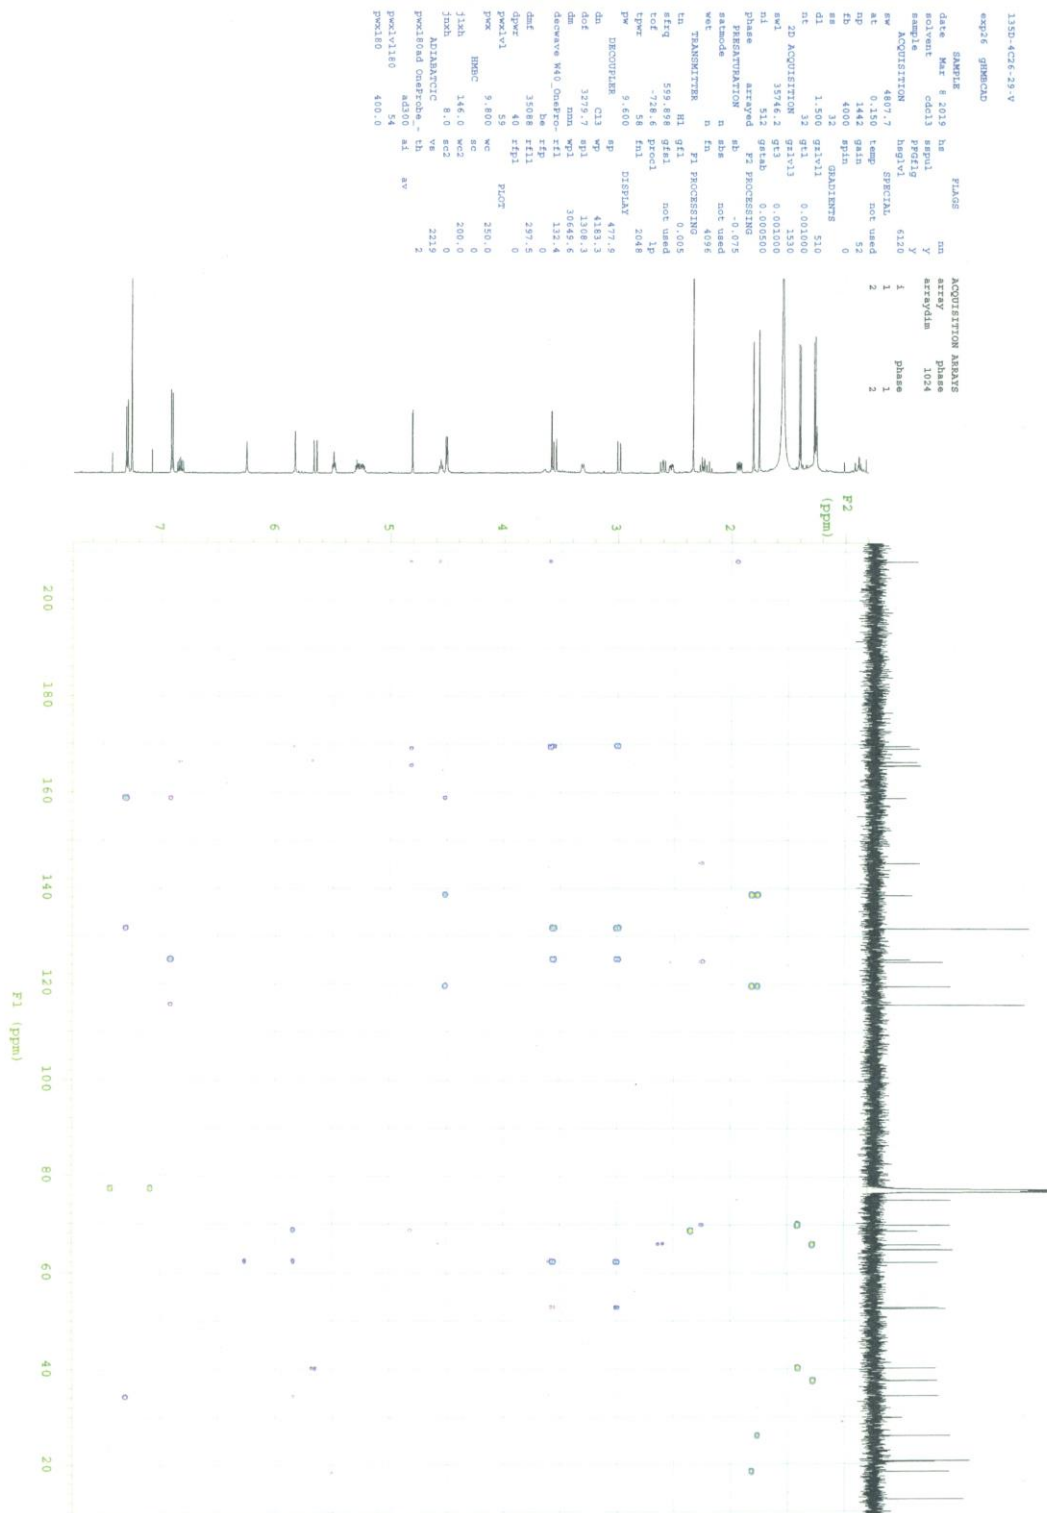

135D-4C26-29-V  
exg26 gsmcnd

SAMPLE FLAG  
date Mar 6 2015 hr  
subject C013 spm1  
sample C013 spm1  
ACQUISITION hsq13  
ac 4807.7 SPECIAL 6120  
at 0.150 temp not used  
np 1442 gain 52  
fb 4000 spm 0  
ss 32 GRADIENTS 510  
dl 1.500 g1v11 0.001000  
nt 32 g1v13 1530  
2D ACQUISITION  
w1 35746.2 g13 0.001000  
w2 512 g1ab 0.000500  
Phase arrayed F2 PROCESSING  
PRESATURATION 0 sbs not used  
satmode n sbs not used  
wet n f0 4096  
TRANSMITTER n f0  
ln n1 g1 0.005  
sfreq 559.898 gfa1 not used  
tot -728.6 proc1 lp  
tpr 58 fml  
pw 9.600 DISPLAY 2048  
DECOUPLER C13 sp 661.0  
ddt 3279.7 w1 1617.4  
ddt 3279.7 w2 2911.5  
dmsave W40 GmFHC-451  
be rfd 128.4  
dms 35088 rfd1 297.5  
dpr 40 rfd1 0  
pwr1v1 59 PLOT  
pwr 9.800 wc 250.0  
J1kh 145.0 wc2 200.0  
J1kh 8.0 wc2 0  
ADJANALYTIC va 2219  
pwr1v180 A1800 A1  
pwr1v180 450.0

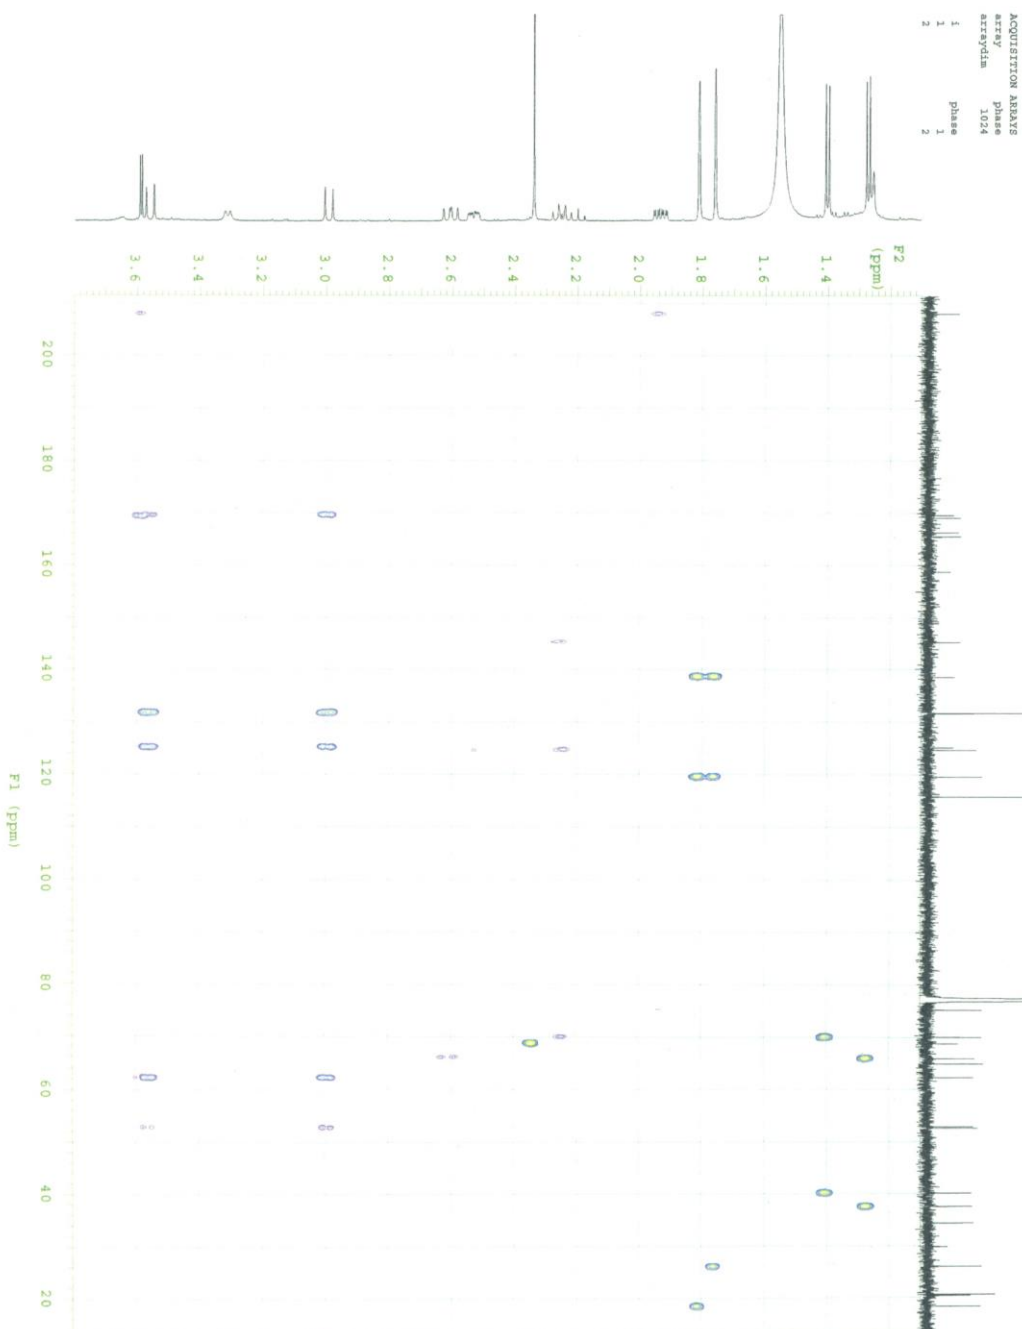

135D-4C26-28-V

exg26 gbmcdm

| SAMPLE         |            | FLAGS     |            | ACQUISITION ARRAYS |       |
|----------------|------------|-----------|------------|--------------------|-------|
| date           | Mar 8 2019 | hs        | nm         | array              | phase |
| solvent        | cdcl3      | sepal     | y          | arraydim           | 1024  |
| sample         | 46077      | hagv1     | y          | arraydim           | 1024  |
| acq            | 46077      | hagv1     | y          | arraydim           | 1024  |
| nt             | 0.150      | temp      | not used   |                    |       |
| np             | 1442       | gain      | 52         |                    |       |
| fb             | 4000       | mpis      | 0          |                    |       |
| ss             | 32         | GRADIENTS | 0          |                    |       |
| d1             | 1.500      | gr1v11    | 510        |                    |       |
| nt             | 32         | gr1       | 0.001000   |                    |       |
| 2D ACQUISITION | gr1v13     | 1530      |            |                    |       |
| sw1            | 35746.2    | gr1       | 0.001000   |                    |       |
| nl             | 512        | gr1ab     | 0.000500   |                    |       |
| phase          | arrayed    | f2        | PROCESSING |                    |       |
| PREPARATION    | ab         | -0.075    |            |                    |       |
| balance        | n          | not used  |            |                    |       |
| weight         | n          | not used  |            |                    |       |
| TRANSMITTER    | n          | not used  |            |                    |       |
| tn             | 599.698    | gr1       | not used   |                    |       |
| efrq           | 599.698    | gr1       | not used   |                    |       |
| tot            | -728.6     | gr1       | not used   |                    |       |
| lpr            | 58         | fn1       | 2048       |                    |       |
| pw             | 9.600      | DISPLAY   | 494.7      |                    |       |
| dn             | 494.7      | sp        | 414.0      |                    |       |
| ddt            | 3579.7     | sp1       | 17084.9    |                    |       |
| dm             | nm         | wp1       | 8901.6     |                    |       |
| decoupler      | W40        | gr1       | 132.4      |                    |       |
| dmr            | 3508.4     | rfp       | 287.5      |                    |       |
| dpr            | 40         | rfp1      | 0          |                    |       |
| lprv1          | 58         | PCOT      | 250.0      |                    |       |
| pw             | 9.800      | mc        | 0          |                    |       |
| lprh           | 146.0      | mc2       | 200.0      |                    |       |
| lprh           | 8.0        | mc2       | 0          |                    |       |
| ADDITIONAL     | vs         | 2119      |            |                    |       |
| pw1v1b6        | ad100      | al        | 2          |                    |       |
| pw1v1b6        | 54         | av        |            |                    |       |
| pw1v1b6        | 400.0      |           |            |                    |       |

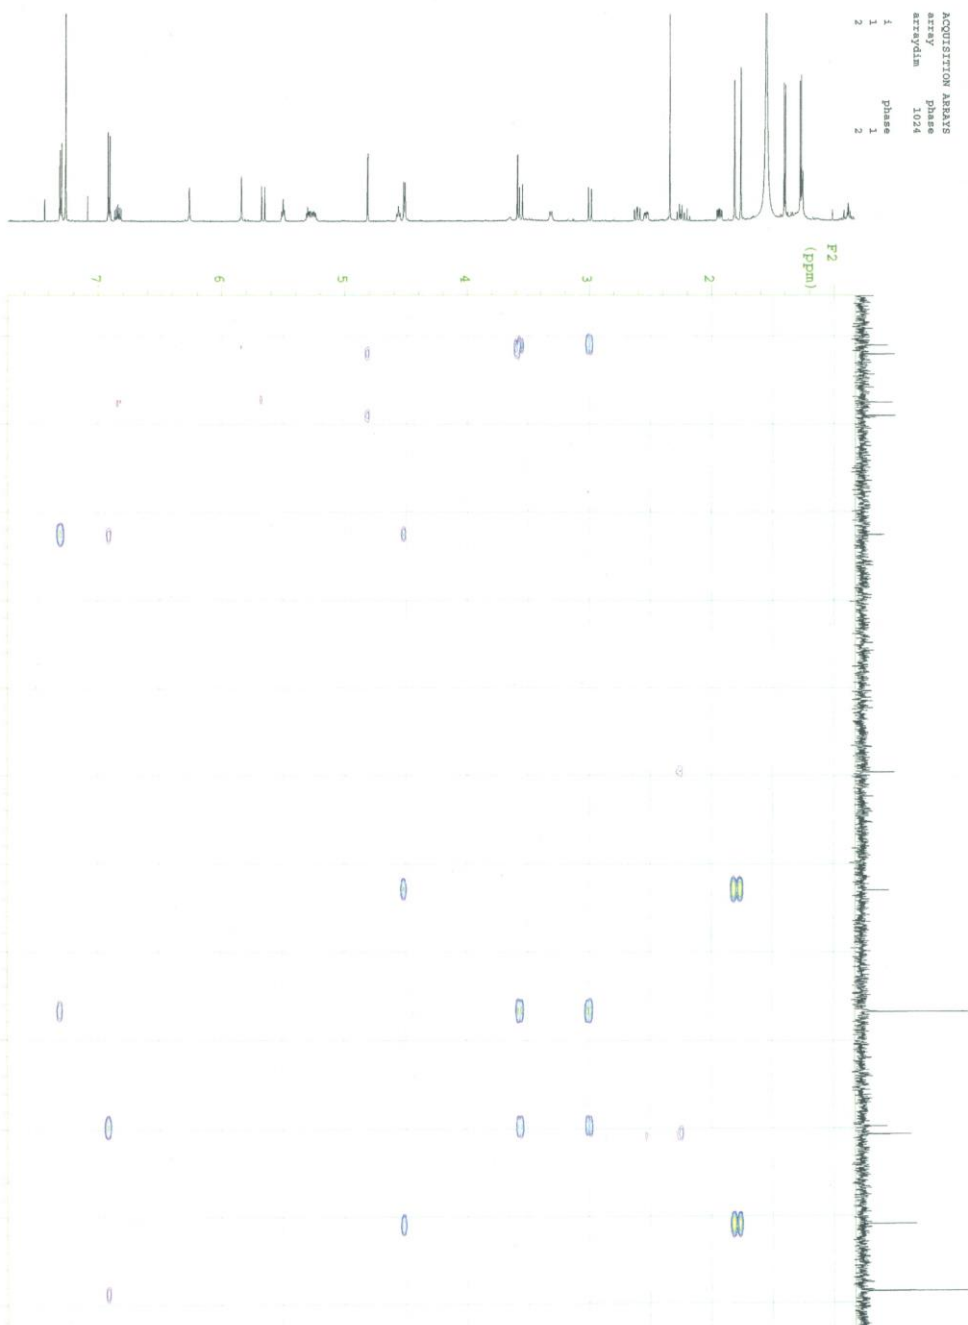



exp26 ghmbcad

exp26 ghmbcad

| ACQUISITION ARRAYS |       |
|--------------------|-------|
| array              | phase |
| arraydim           | 1024  |
| 1                  | phase |
| 1                  | 1     |
| 2                  | 2     |

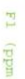

135D-4C26-28-V

exp26 gsmcchd

SAMPLE  
date Mar 8 2015  
solvent CDCl3  
sample 1  
ACQUISITION 4807.7  
nu 0.150 temp not used  
ap 1442 gain 52  
fp 4000 spia 0  
ss 32  
d1 1.500 g1v11 510  
nt 32 g1v1 0.001000  
2D ACQUISITION  
w1 35746.2 g13 0.001000  
w2 512 g1ab 0.000500  
Phase arrayed F2 PROCESSING 0.075  
PRESATURATION 1b not used  
saturated n shs not used  
wet n fo 4956  
TRANSMITTER n F1 PROCESSING  
ln n1 g1 0.005  
sfreq 599.898 g1a1 not used  
tcf -728.6 proc1 1p  
lpr 58 f1 2048  
pw 9.600  
INOCULATOR C13  
dn 496.7  
ddt 3279.7 sp1 4141.0  
dm 2250.8  
dms 9704.5  
decrease W40 Gain 124.4  
b rfo 132.0  
dnt 35088 r11 297.5  
dpr 40 rfp1 0  
fpe1v1 59 PLOT  
fpe1 5.800 wc 256.0  
f1h 146.0 wc2 200.0  
f1h 8.0 ec2 0  
ADJANTIC v8 219  
fpe1f1d0 42150 a1 av 2  
fpe1f1s0 34  
fpe1f1d0 400.0

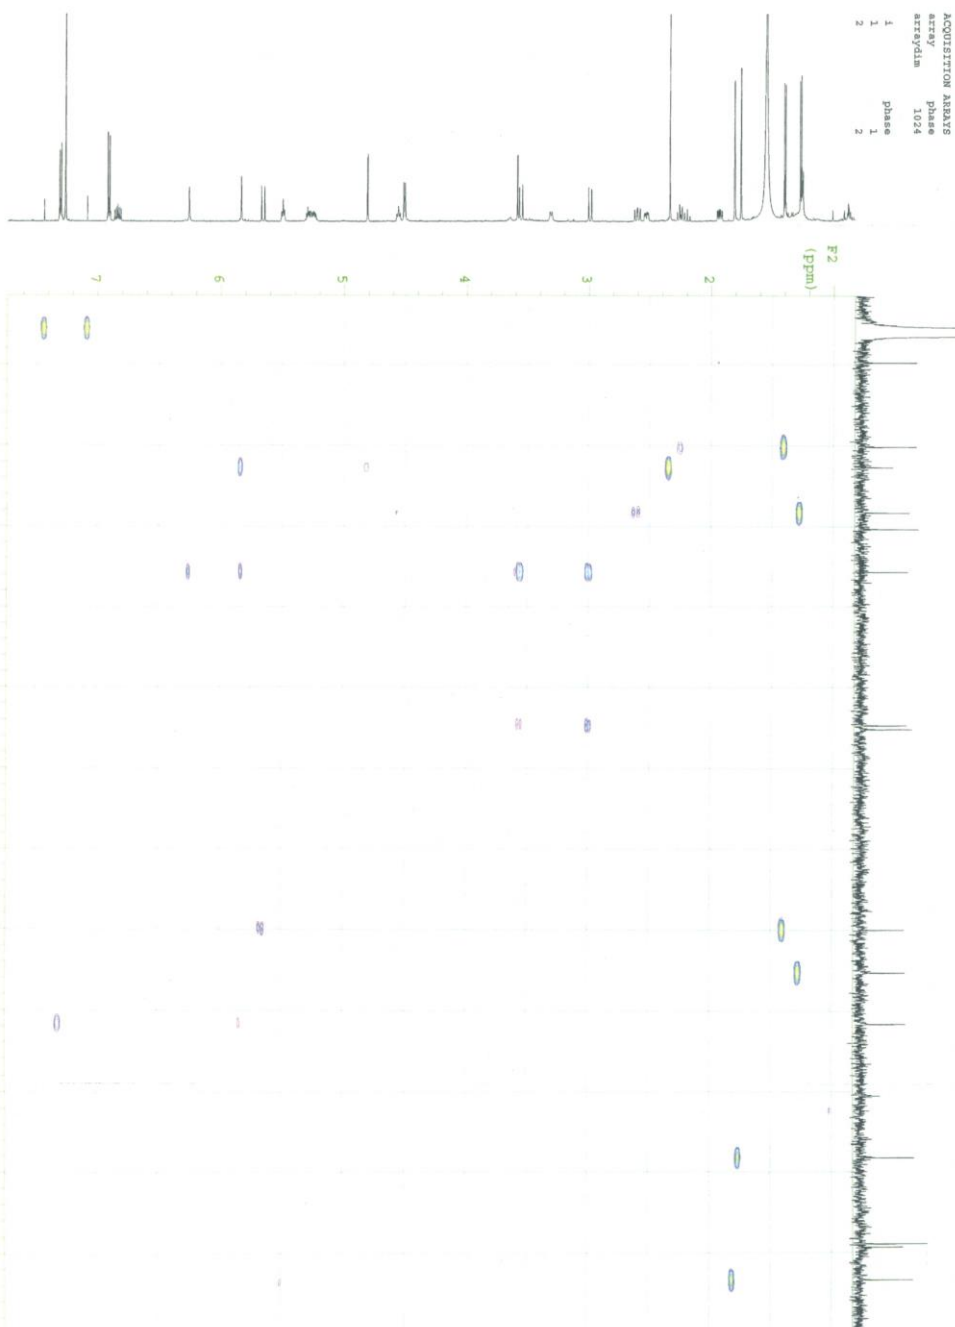

Figure S8 FABMS of 2

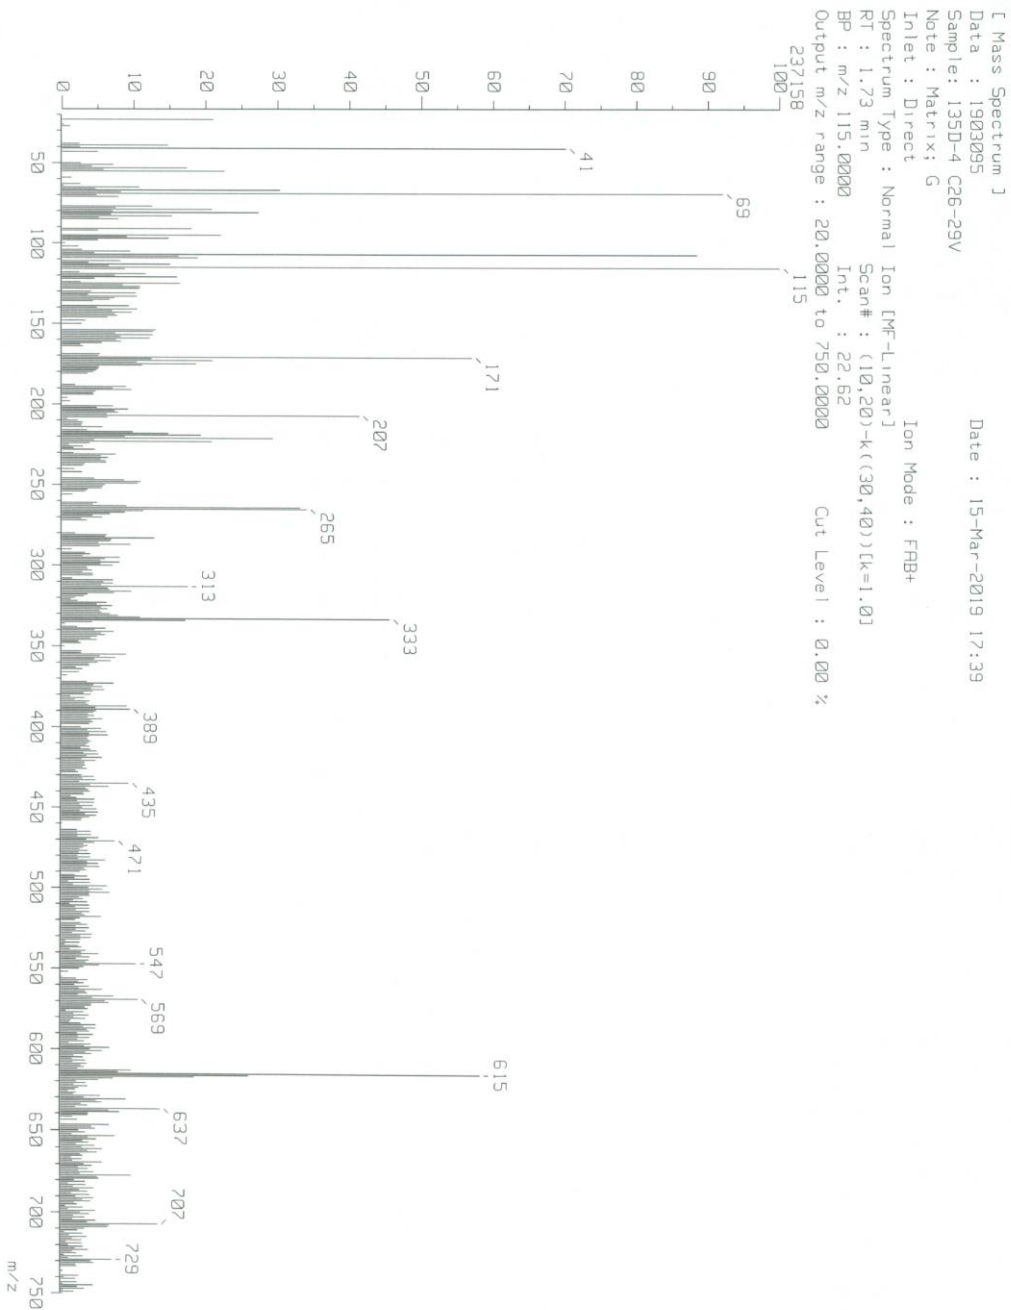

[ Mass Spectrum ]

Data : 1903095

Date : 15-Mar-2019 17:39

Page: 1

Sample: 135D-4 C26-29V

Note : Matrix; G

Inlet : Direct

Ion Mode : FAB+

Spectrum Type : Normal Ion [MF-Linear]

RT : 1.73 min Scan# : (10,20)-k((30,40)) [k=1.0]

BP : m/z 115.0000 Int. : 22.62

Output m/z range : 20.0000 to 750.0000 Cut Level : 10.00 %

| m/z      | Int.  | Norm.  | m/z      | Int.  | Norm. |
|----------|-------|--------|----------|-------|-------|
| 23.0000  | 4.75  | 21.00  | 332.0000 | 2.45  | 10.85 |
| 39.0000  | 3.33  | 14.72  | 333.0000 | 10.30 | 45.55 |
| 41.0000  | 15.86 | 70.10  | 334.0000 | 3.88  | 17.15 |
| 53.0000  | 3.93  | 17.38  | 547.0000 | 2.36  | 10.44 |
| 55.0000  | 5.10  | 22.56  | 569.0000 | 2.42  | 10.69 |
| 65.0000  | 2.43  | 10.74  | 615.0000 | 13.19 | 58.31 |
| 67.0000  | 6.86  | 30.32  | 616.0000 | 5.90  | 26.10 |
| 69.0000  | 20.82 | 92.06  | 617.0000 | 4.19  | 18.52 |
| 77.0000  | 2.84  | 12.56  | 637.0000 | 3.13  | 13.84 |
| 79.0000  | 4.71  | 20.84  | 707.0000 | 3.04  | 13.45 |
| 81.0000  | 6.17  | 27.30  |          |       |       |
| 83.0000  | 3.47  | 15.32  |          |       |       |
| 91.0000  | 4.08  | 18.03  |          |       |       |
| 95.0000  | 4.99  | 22.07  |          |       |       |
| 97.0000  | 3.36  | 14.85  |          |       |       |
| 107.0000 | 20.01 | 88.45  |          |       |       |
| 108.0000 | 3.66  | 16.18  |          |       |       |
| 109.0000 | 4.26  | 18.85  |          |       |       |
| 113.0000 | 3.40  | 15.03  |          |       |       |
| 115.0000 | 22.62 | 100.00 |          |       |       |
| 119.0000 | 2.63  | 11.65  |          |       |       |
| 121.0000 | 3.61  | 15.97  |          |       |       |
| 125.0000 | 3.71  | 16.42  |          |       |       |
| 127.0000 | 2.45  | 10.85  |          |       |       |
| 128.0000 | 2.44  | 10.78  |          |       |       |
| 131.0000 | 2.32  | 10.28  |          |       |       |
| 133.0000 | 2.36  | 10.43  |          |       |       |
| 141.0000 | 2.37  | 10.47  |          |       |       |
| 154.0000 | 2.94  | 13.02  |          |       |       |
| 155.0000 | 2.86  | 12.65  |          |       |       |
| 157.0000 | 2.86  | 12.64  |          |       |       |
| 159.0000 | 2.76  | 12.20  |          |       |       |
| 171.0000 | 12.90 | 57.02  |          |       |       |
| 172.0000 | 2.82  | 12.45  |          |       |       |
| 173.0000 | 4.74  | 20.96  |          |       |       |
| 174.0000 | 2.35  | 10.38  |          |       |       |
| 175.0000 | 4.22  | 18.66  |          |       |       |
| 176.0000 | 2.52  | 11.15  |          |       |       |
| 207.0000 | 9.35  | 41.34  |          |       |       |
| 218.0000 | 3.34  | 14.77  |          |       |       |
| 219.0000 | 4.37  | 19.31  |          |       |       |
| 221.0000 | 6.63  | 29.32  |          |       |       |
| 223.0000 | 4.71  | 20.82  |          |       |       |
| 248.0000 | 2.48  | 10.96  |          |       |       |
| 249.0000 | 2.38  | 10.52  |          |       |       |
| 264.0000 | 7.49  | 33.11  |          |       |       |
| 265.0000 | 7.69  | 34.02  |          |       |       |
| 266.0000 | 2.57  | 11.34  |          |       |       |
| 283.0000 | 2.91  | 12.85  |          |       |       |
| 313.0000 | 3.96  | 17.51  |          |       |       |

[ Elemental Composition ]

Data : 1904044

Date : 11-Apr-2019 18:01

Page: 1

Sample: 135D-4 C26-29 V

Note : Matrix; G

Inlet : Direct

Ion Mode : FAB+

RT : 6.47 min

Scan#: (50,55)

Elements : C 35/25, H 45/35, N 4/0, O 12/0, S 1/0

Mass Tolerance : 20ppm, 2mmu if m/z > 100

Unsaturation (U.S.) : -1.0 - 40.0

| Observed m/z | Int%  | Err[ppm / mmu] | U.S. | Composition         |
|--------------|-------|----------------|------|---------------------|
| 615.2378     | 100.0 | +0.3 / +0.2    | 14.5 | C 31 H 39 N 2 O 9 S |

Figure S9 IR spectrum of 2

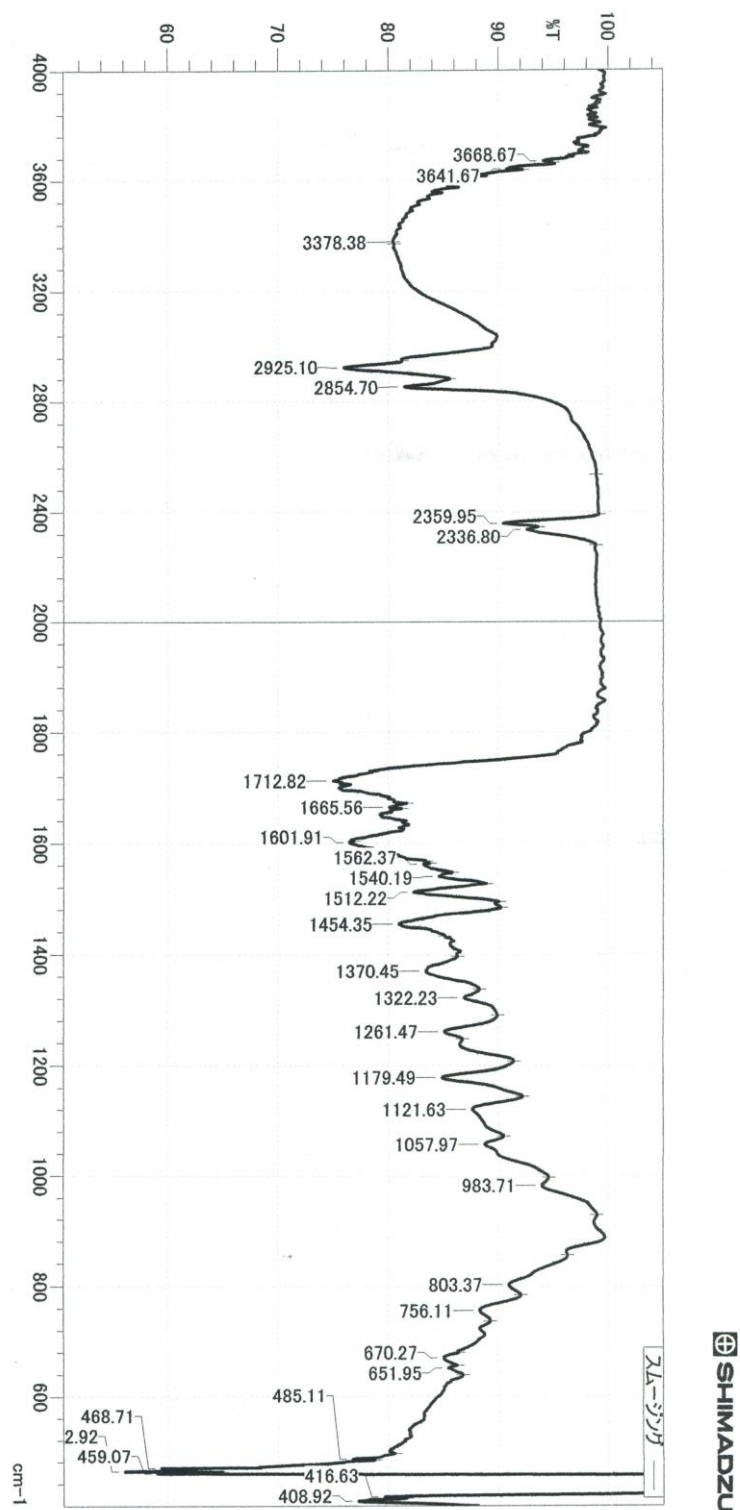

D:\\*医薬分子化学\山田\135D-4 c26 29 V-2 3.ispd

|    |          |                 |
|----|----------|-----------------|
| 2  | サンプル名    | 135D-4 c26 29 V |
| 3  | サンプルID   |                 |
| 4  | オプティ     |                 |
| 5  | 測定モード    | 透過率             |
| 6  | アトメックス関数 | Happ-Genzel     |
| 9  | 掃査回数     | 32              |
| 10 | 分解       | 2 cm⁻¹          |

Figure S10  $^1\text{H}$  NMR spectrum of 3 in  $\text{MeOH-}d_4$

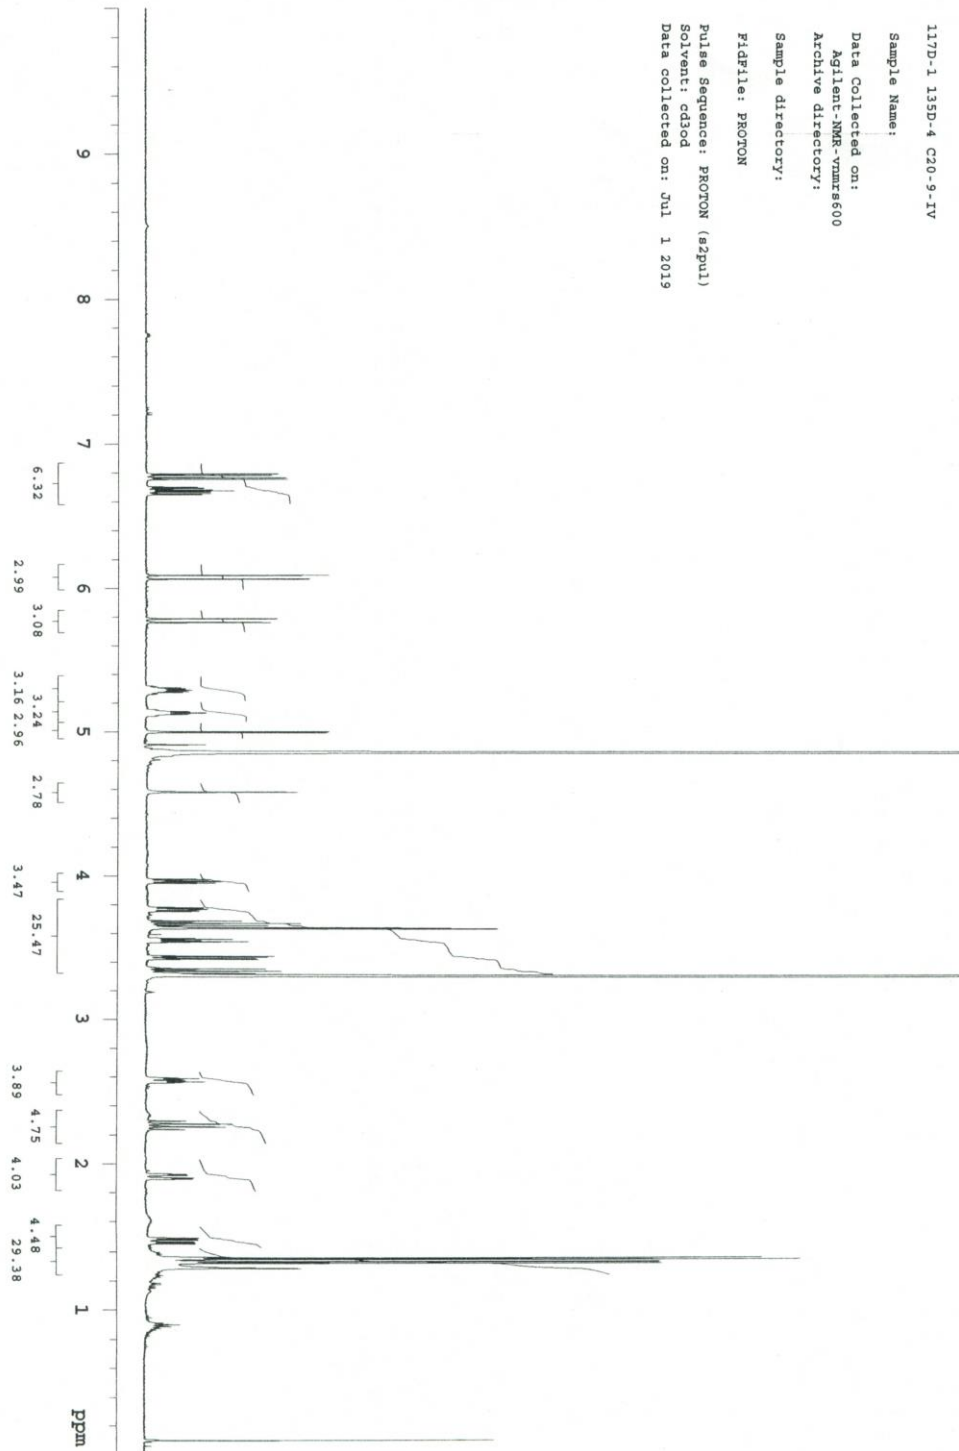

117D-1 135D-4 C20-9-IV

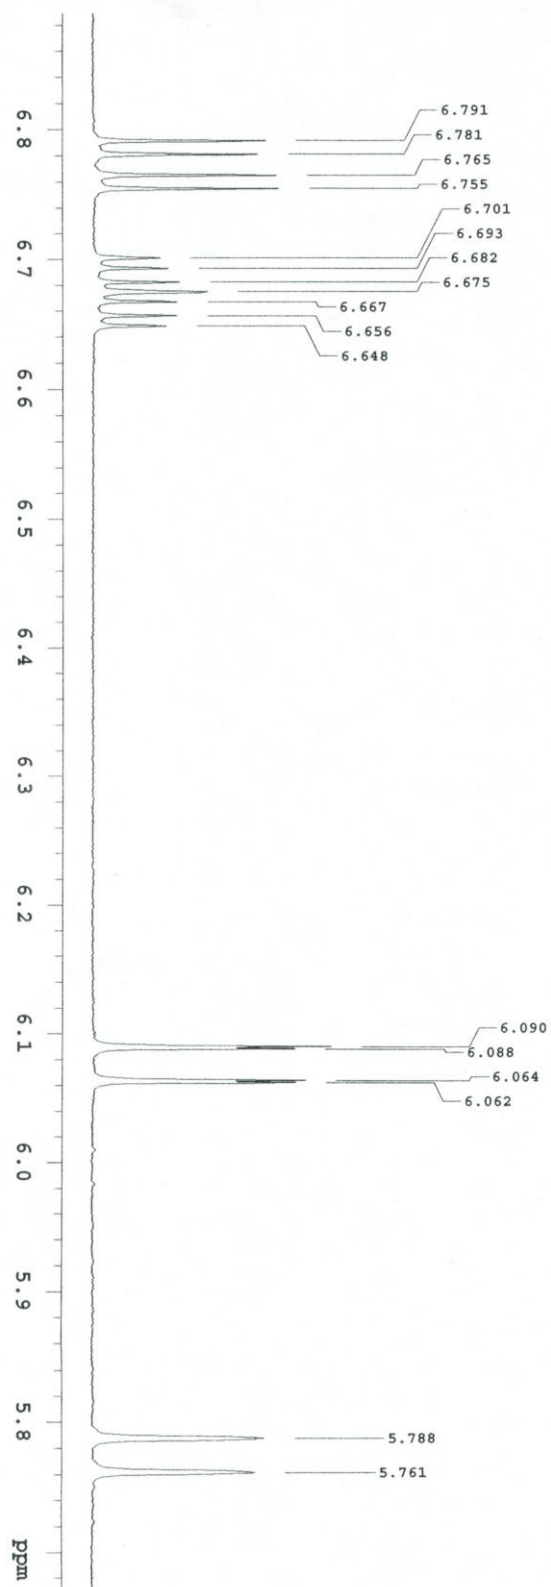



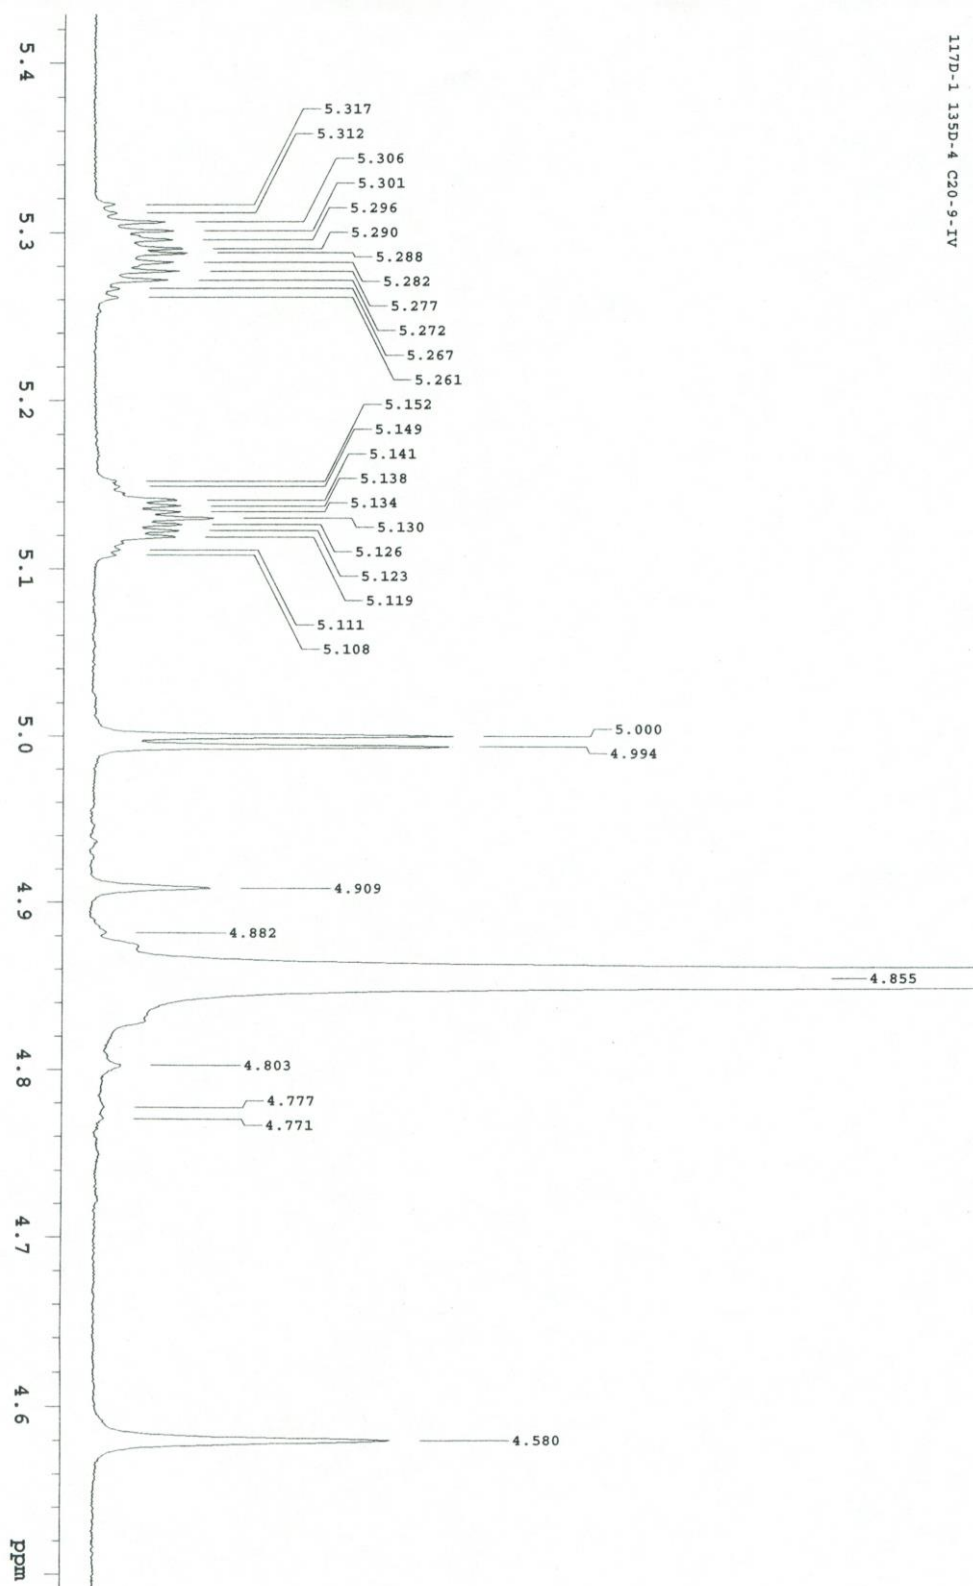

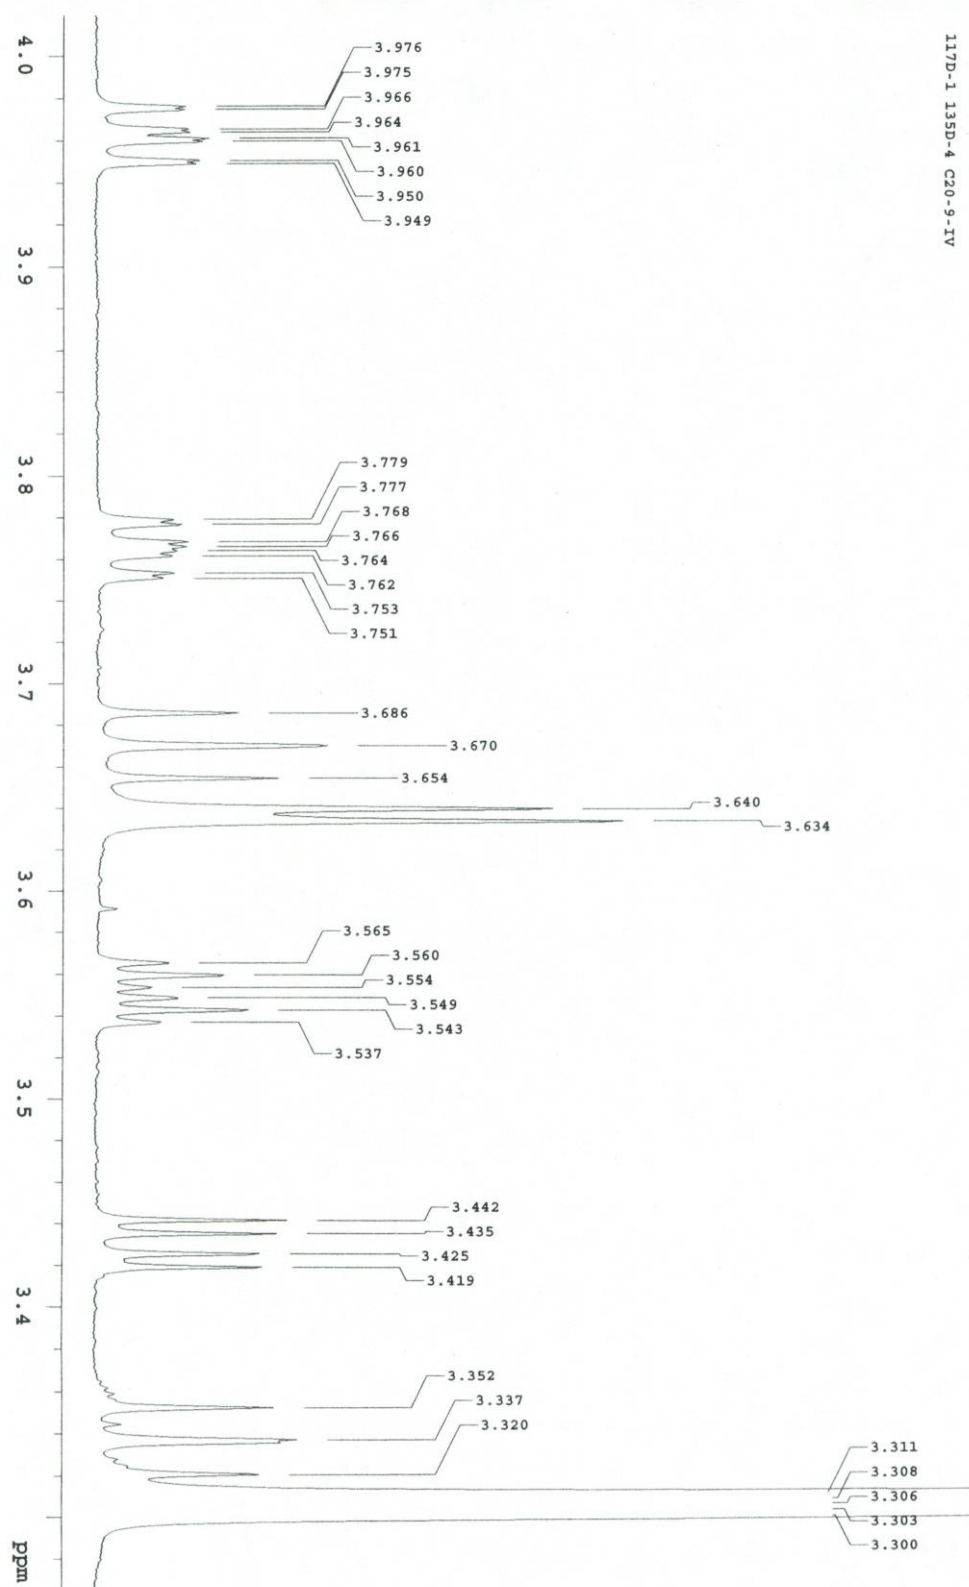

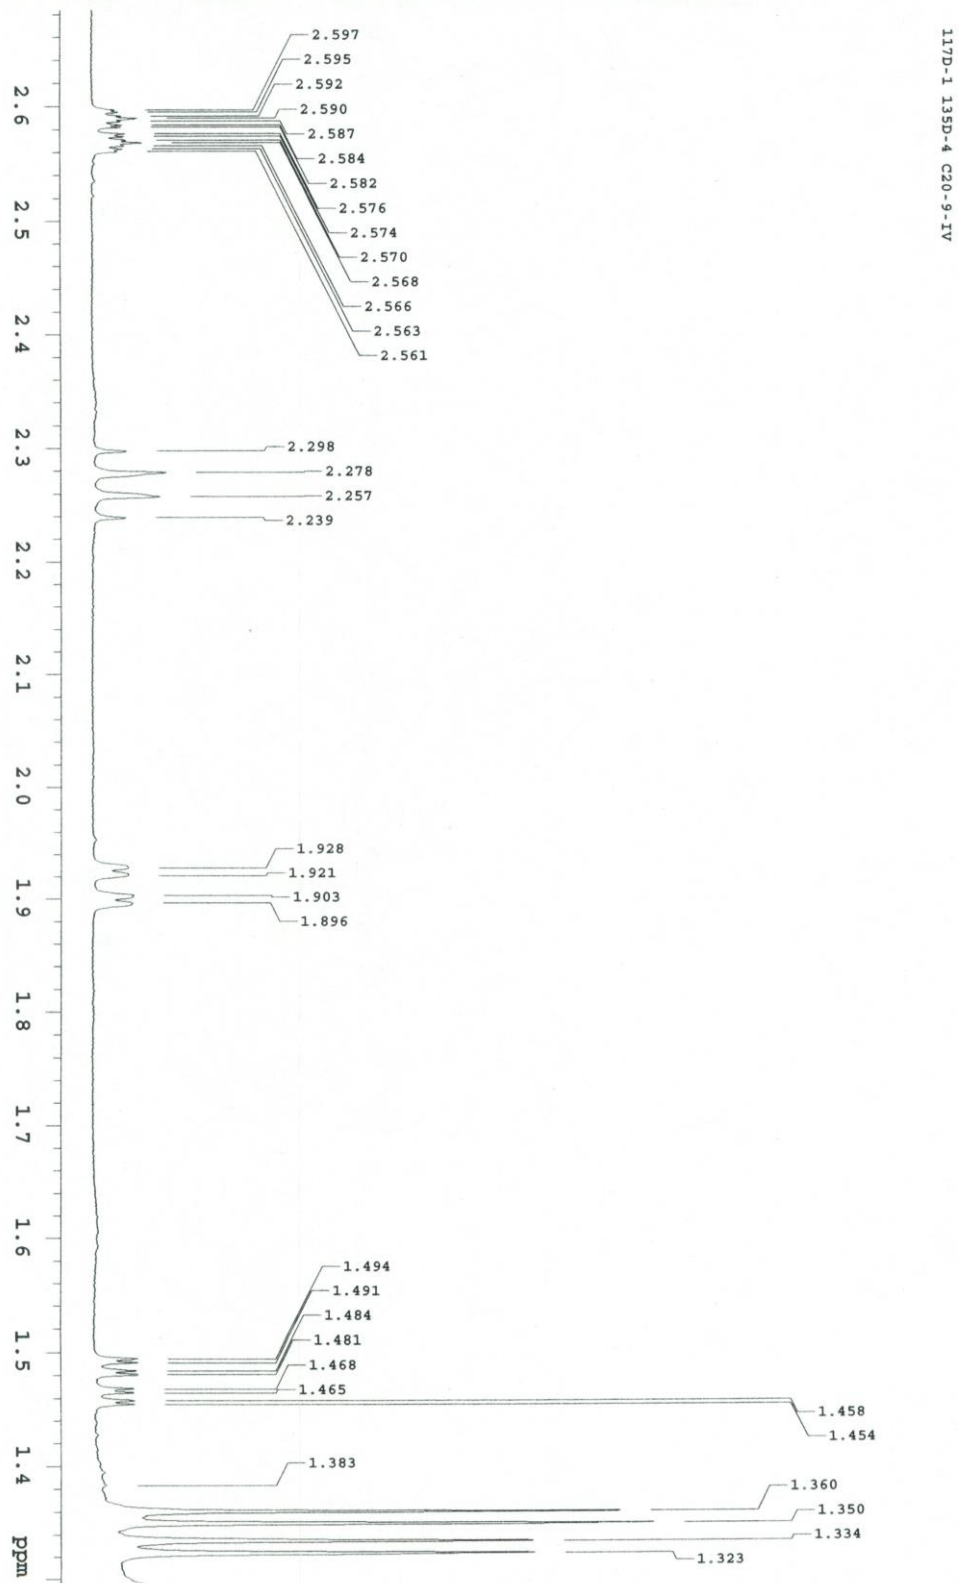

Figure S11  $^{13}\text{C}$  NMR spectrum of 3 in  $\text{MeOH-}d_4$

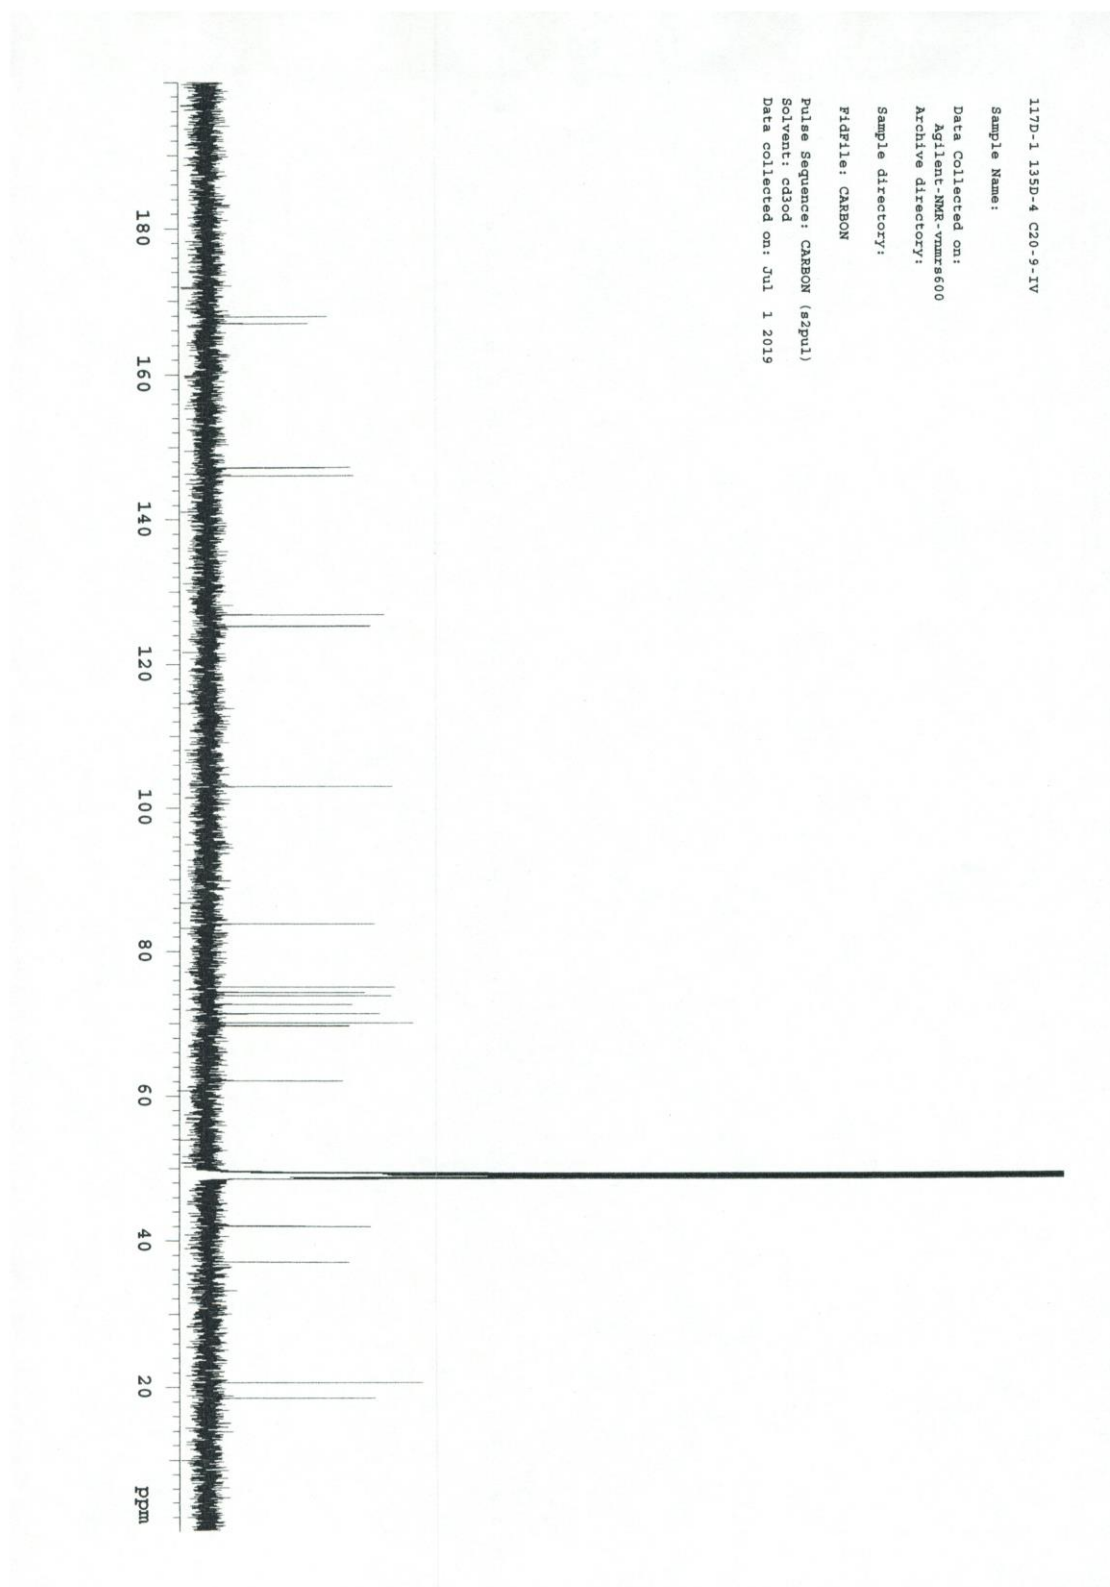

117D-1 135D-4 C20-9-IV

| INDEX | FREQUENCY | PPM     | HEIGHT |
|-------|-----------|---------|--------|
| 1     | 25316.9   | 167.835 | 21.7   |
| 2     | 25174.7   | 166.892 | 18.1   |
| 3     | 22196.9   | 147.151 | 25.7   |
| 4     | 22029.3   | 146.040 | 26.3   |
| 5     | 19127.8   | 126.805 | 31.9   |
| 6     | 18888.5   | 125.219 | 29.4   |
| 7     | 15528.1   | 102.941 | 33.4   |
| 8     | 12644.0   | 83.821  | 30.2   |
| 9     | 11323.9   | 75.070  | 33.9   |
| 10    | 11211.7   | 74.327  | 28.4   |
| 11    | 11141.2   | 73.859  | 33.2   |
| 12    | 10958.6   | 72.648  | 26.1   |
| 13    | 10764.4   | 71.361  | 31.1   |
| 14    | 10574.8   | 70.104  | 37.2   |
| 15    | 10512.4   | 69.690  | 25.5   |
| 16    | 9370.3    | 62.119  | 24.4   |
| 17    | 7483.7    | 49.612  | 13.5   |
| 18    | 7462.9    | 49.474  | 65.9   |
| 19    | 7441.0    | 49.339  | 1572.9 |
| 20    | 7420.2    | 49.191  | 3779.8 |
| 21    | 7398.2    | 49.045  | 3878.7 |
| 22    | 7377.4    | 48.907  | 3692.4 |
| 23    | 7355.4    | 48.762  | 1810.0 |
| 24    | 7334.6    | 48.624  | 589.1  |
| 25    | 6342.8    | 42.049  | 29.5   |
| 26    | 5592.6    | 37.075  | 25.6   |
| 27    | 3108.4    | 20.607  | 38.9   |
| 28    | 2782.4    | 18.446  | 30.2   |

117D-1 13SD-4 C20-9-IV

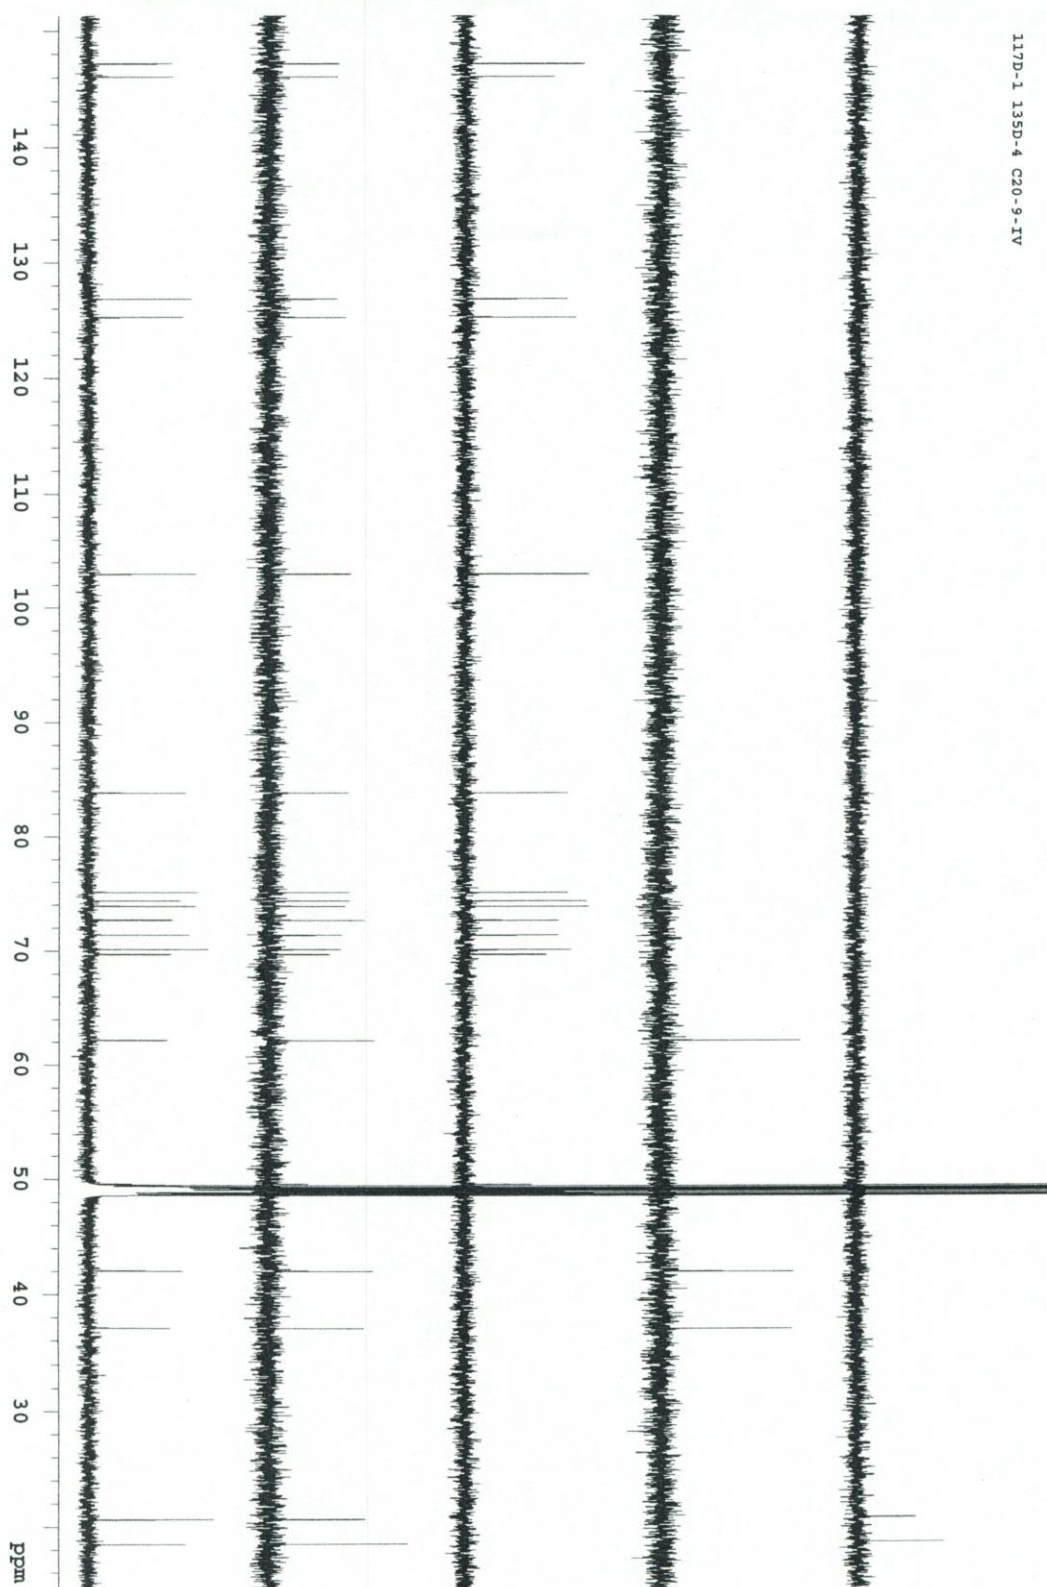

117D-1 13SD-4 C20-9-IV

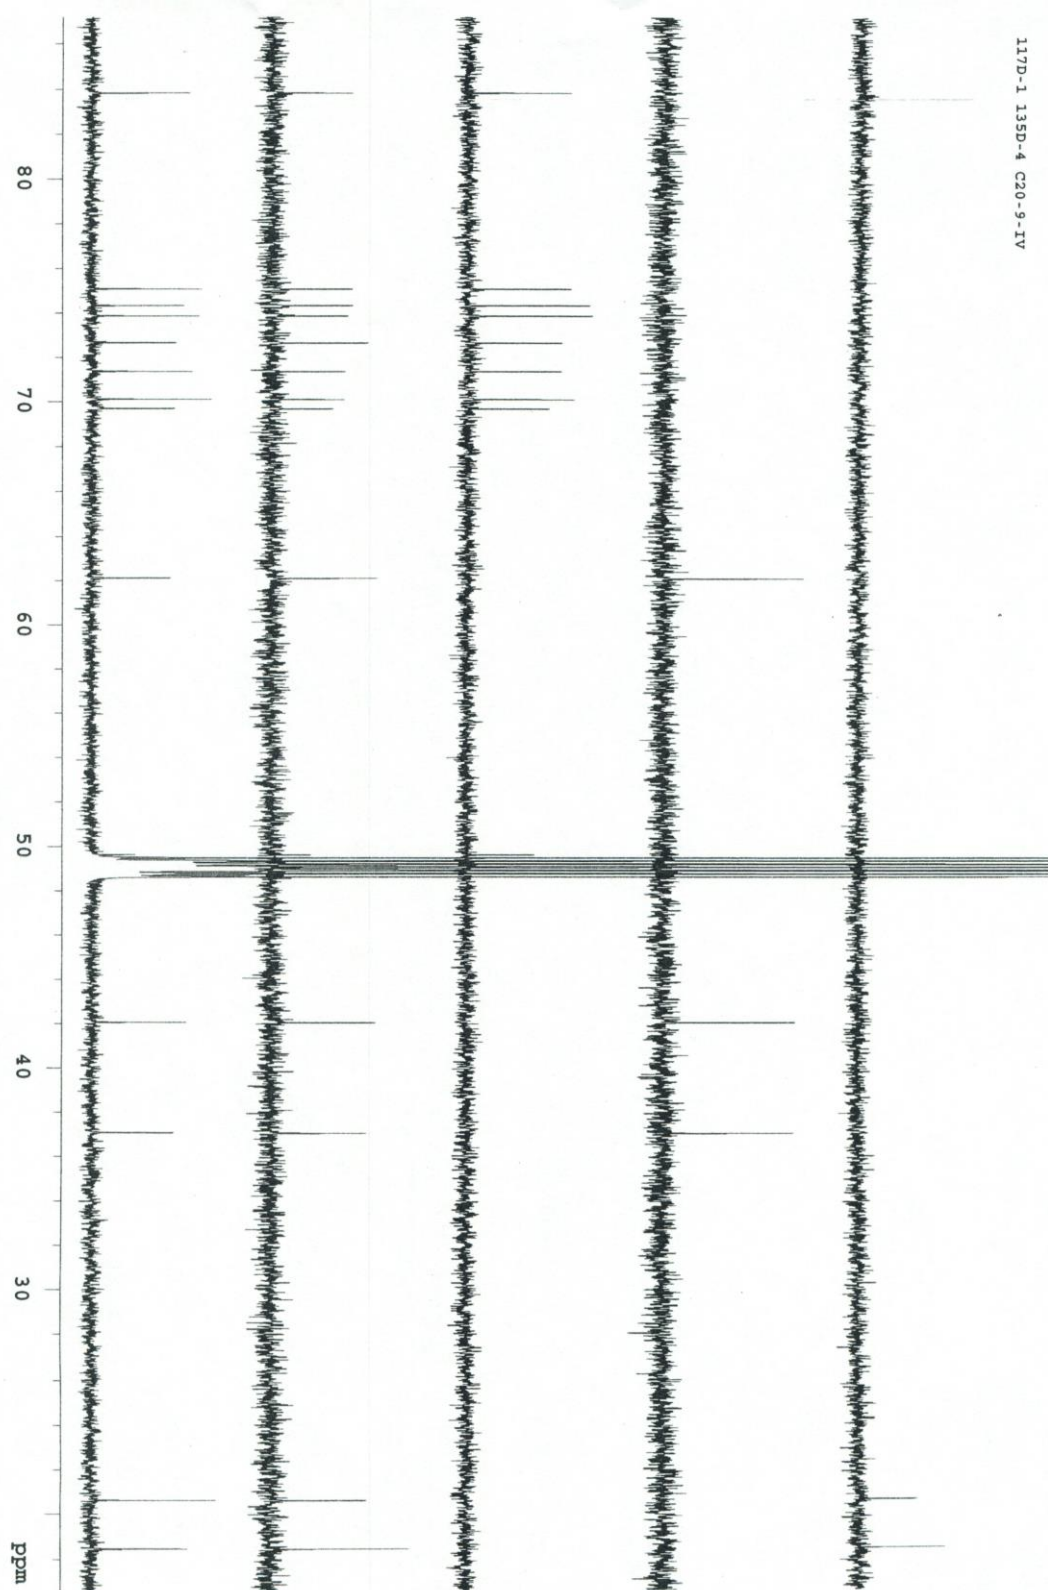



**Figure S12  $^1\text{H}$ - $^1\text{H}$  COSY of 3**

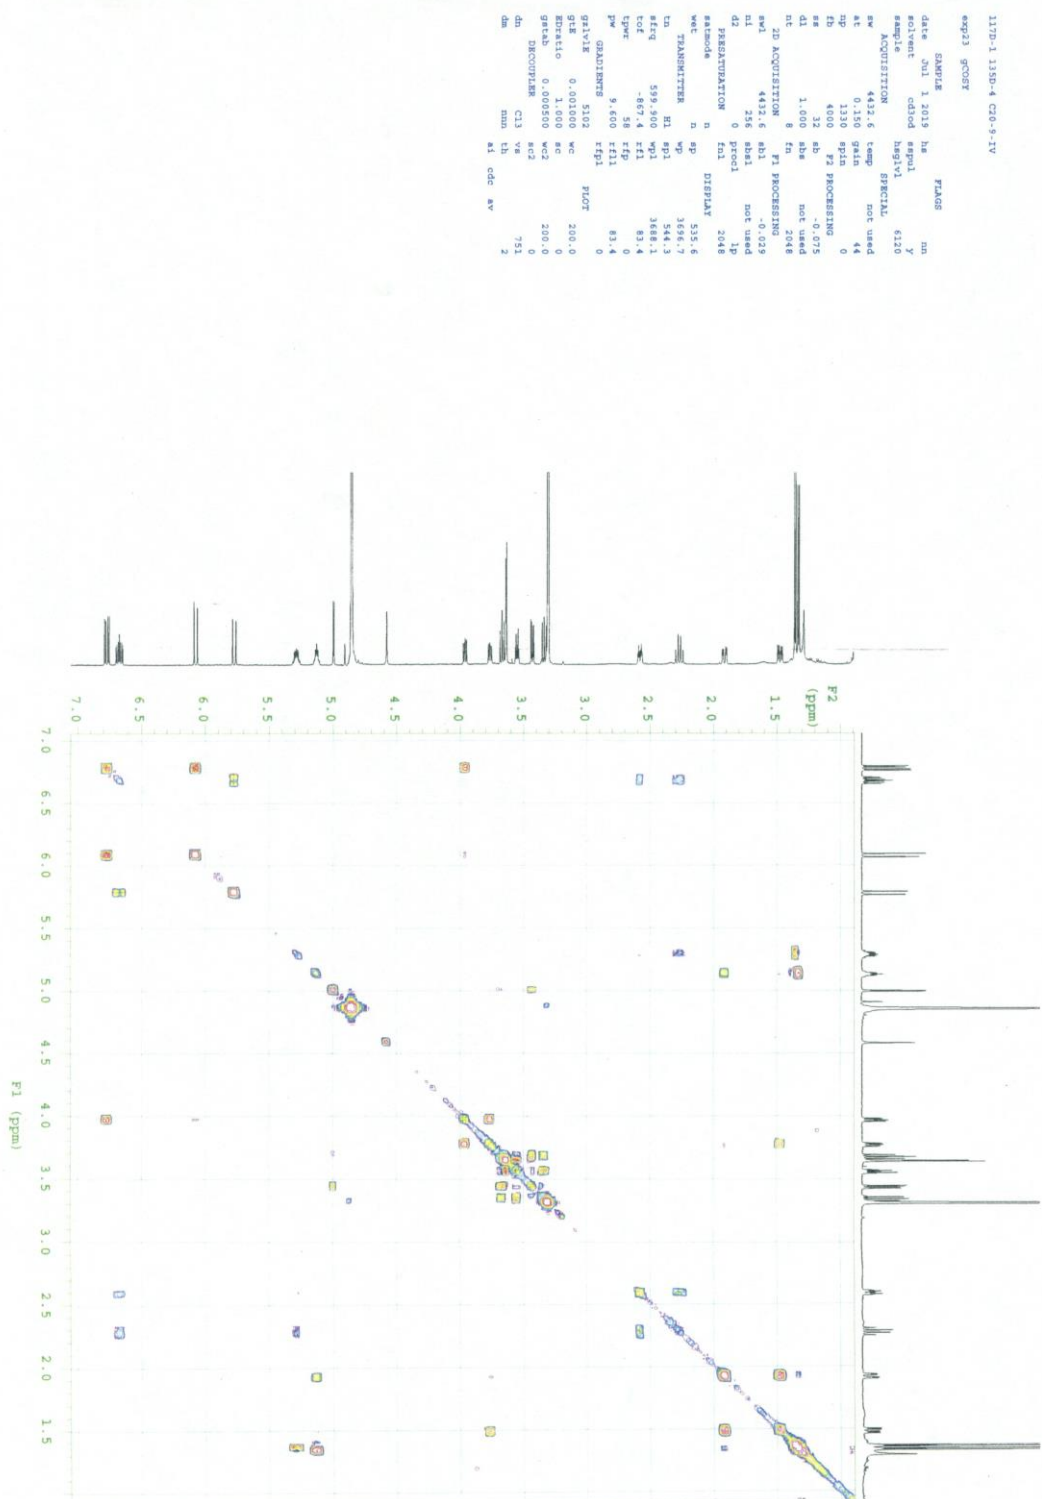



```

117D-1 115D-4 C2D-9-1V
exp23 gcosy

SAMPLE
date Jul 1 2019 hs
solvent ctdod sepi1 y
sample hagi1 6120
ACQUISITION SPECIAL
wv 4432.6 temp not used
at 0.150 gain 44
ap 1150 spin
fp 4000 F2 PROCESSING 0
wv 4432.6 ab not used
dt 1.000 sbw not used
nt 8 F2 2048
2D ACQUISITION 8 F1 PROCESSING -0.029
wv1 4432.6 sb1 not used
nl 256 sbal1 not used
d2 PRESENTATION 0 proc1 1p
PARAMODE n F1 DISPLAY 2048
wet n ap 2799.5
TANDEMATTER n1 wp 1398.2
n2wq 559.800 wpi 3708.1
n3wq 467.441 wpi 3212.4
tprc 58 rfp 83.6
pw GRADIENTS 9.600 rfp1 83.6
g1v1e 5102 F1 F2 0
g1v1e 0.001000 wc 250.0
g1v1e 1.000 wc 0
g1v1e 0.000500 wc2 200.0
DECOUPLER C13 v8 751
dm mm ch al cdc ny 2

```

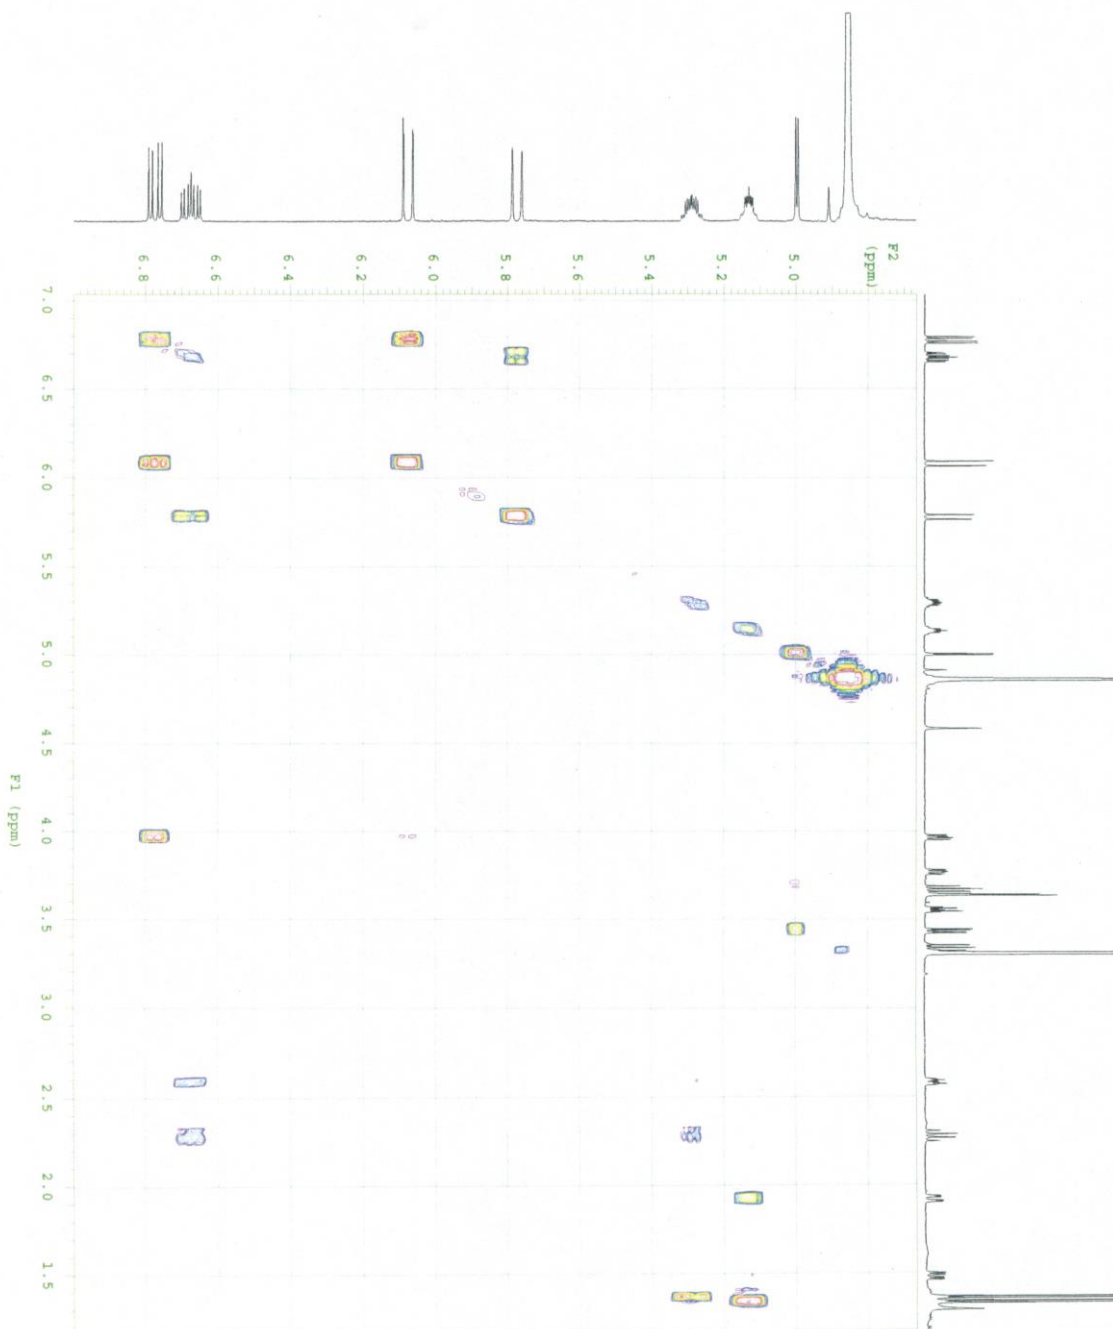

```

117D-1 135D-4 C20-9-IV
exp23 gCOSY
=====
SAMPLE          FLAG
date  Jul 1 2019  hr
solvent  cdcl3  repul  Y
sample  6130
ACQUISITION
  av  4432.6  temp  not used
  at  0.150  gain  44
  np  1330  spin  0
  fb  4000  p2 PROCESSING 0
  ss  32  sb  -0.075
  d1  1.000  sbc  not used
  n1  8  fm  2048
  n1d ACQUISITION 8  fm  2048
  n1d 4432.6  sb  0.025
  n1  256  sbal  not used
  d2  0  proc1  lp
  PRESENTATION  fml  DISPLAY 2048
=====
PARAMETERS
  wet  n  sp  674.1
  tn  n1  wp  1824.7
  efrq  599.900  wpl  678.4
  tot  -867.4  r1  1831.1
  fpcr  38  rfp  83.4
  pw  GRADIENTS 5132  rfp1  0
  g1v1x  0.001000  PLOT 200.0
  g1v1y  0.001000  wc  0
  g1v1z  1.000  mc  0
  grab  0.000500  wcd  200.0
  DECOUPLER  c13  vs  0
  dm  mm  th  751
  al  cdc  av  2

```

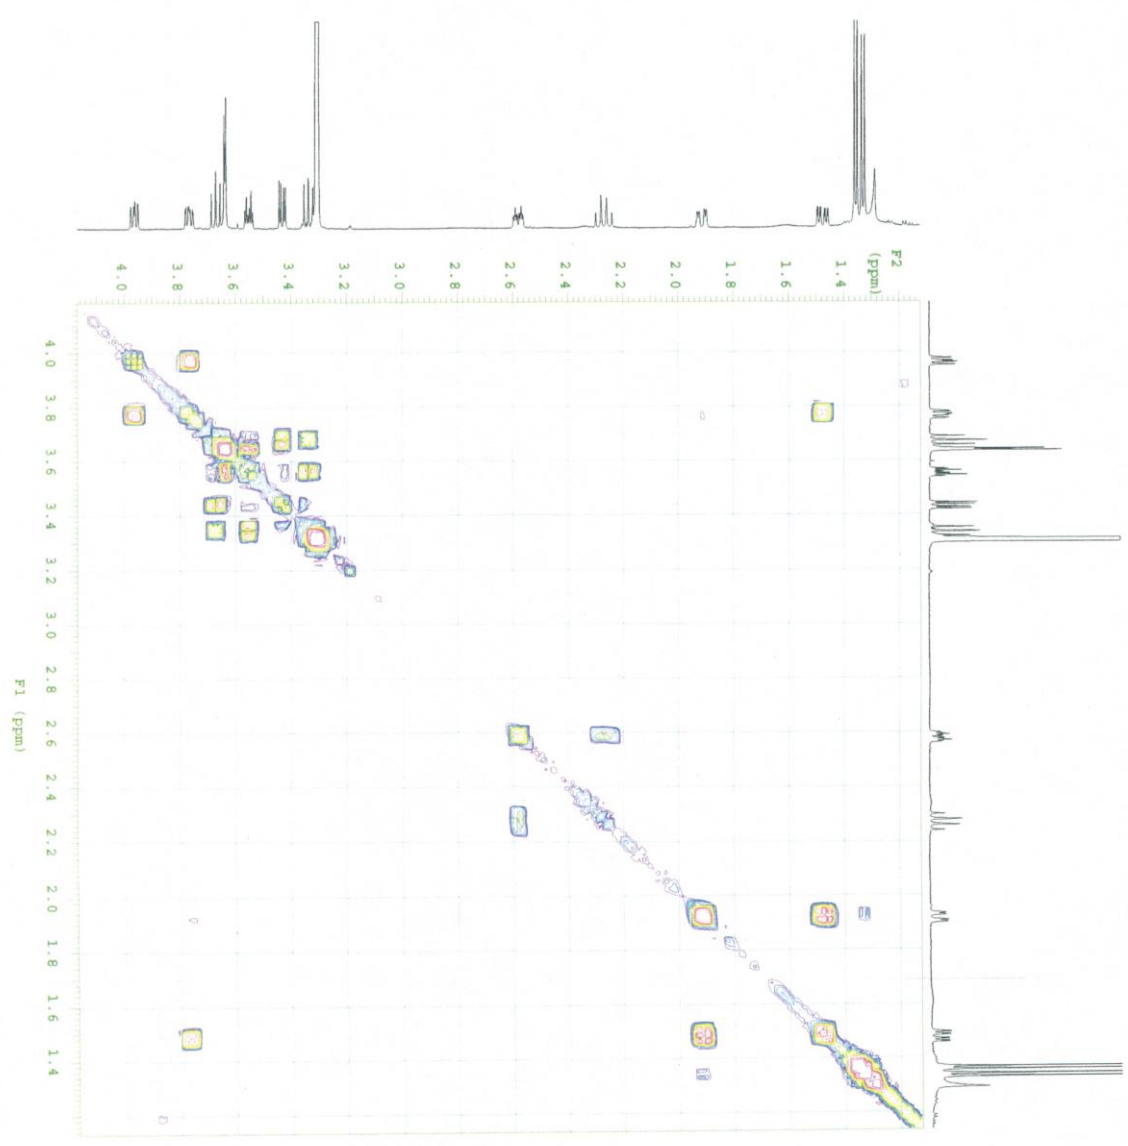

Figure S13 NOESY of 3

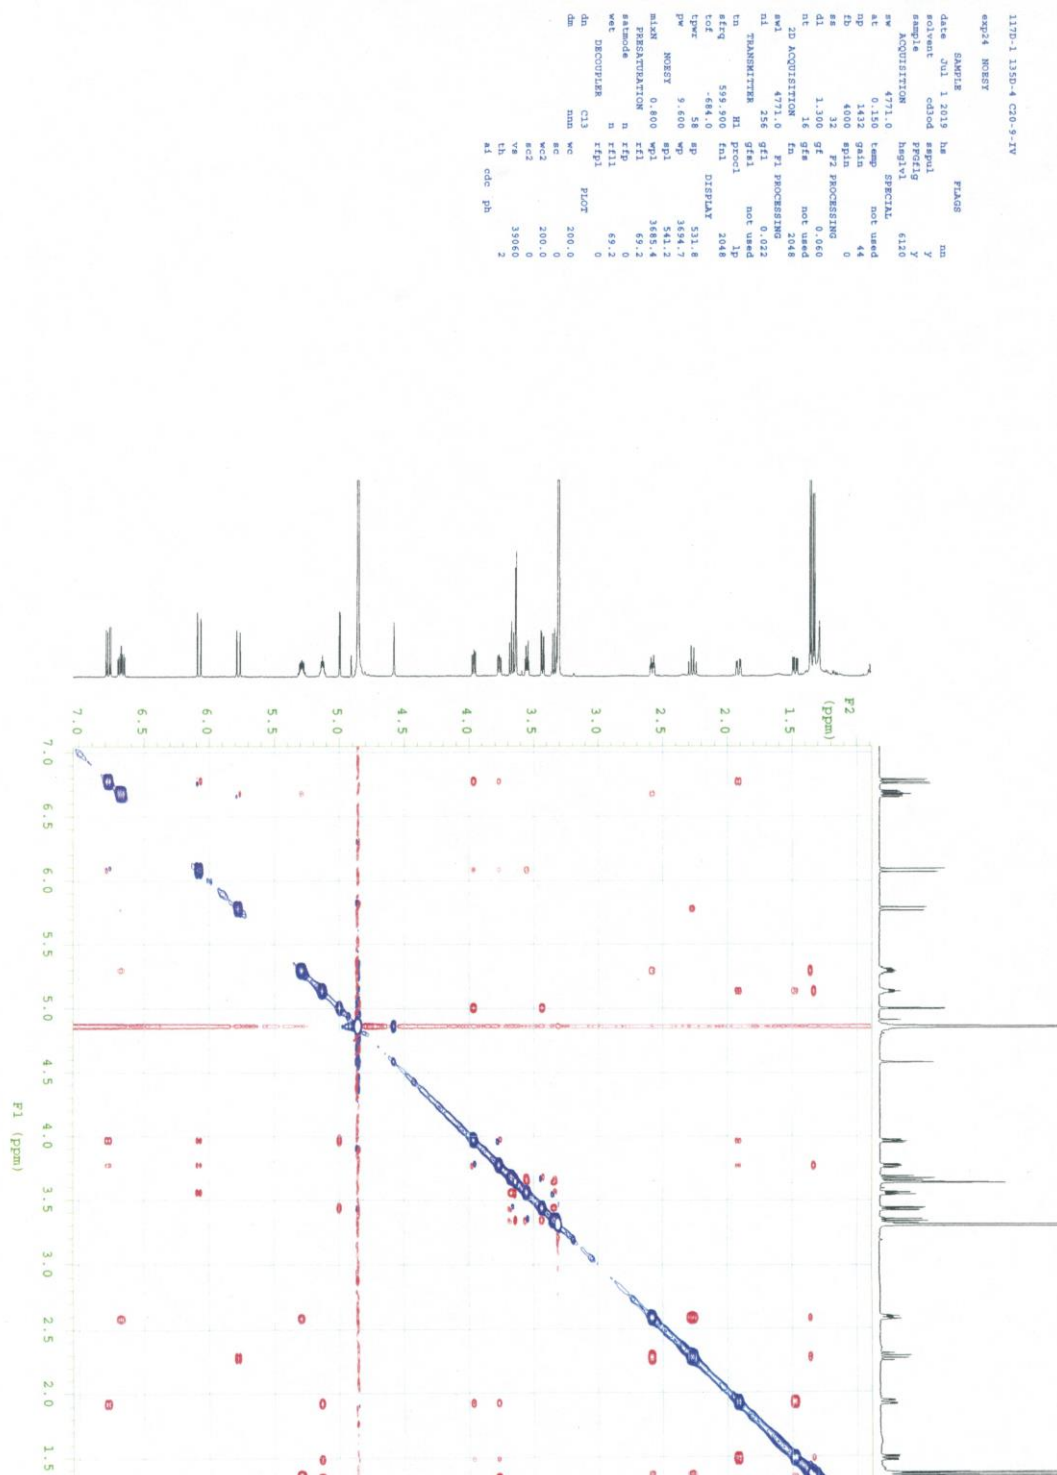

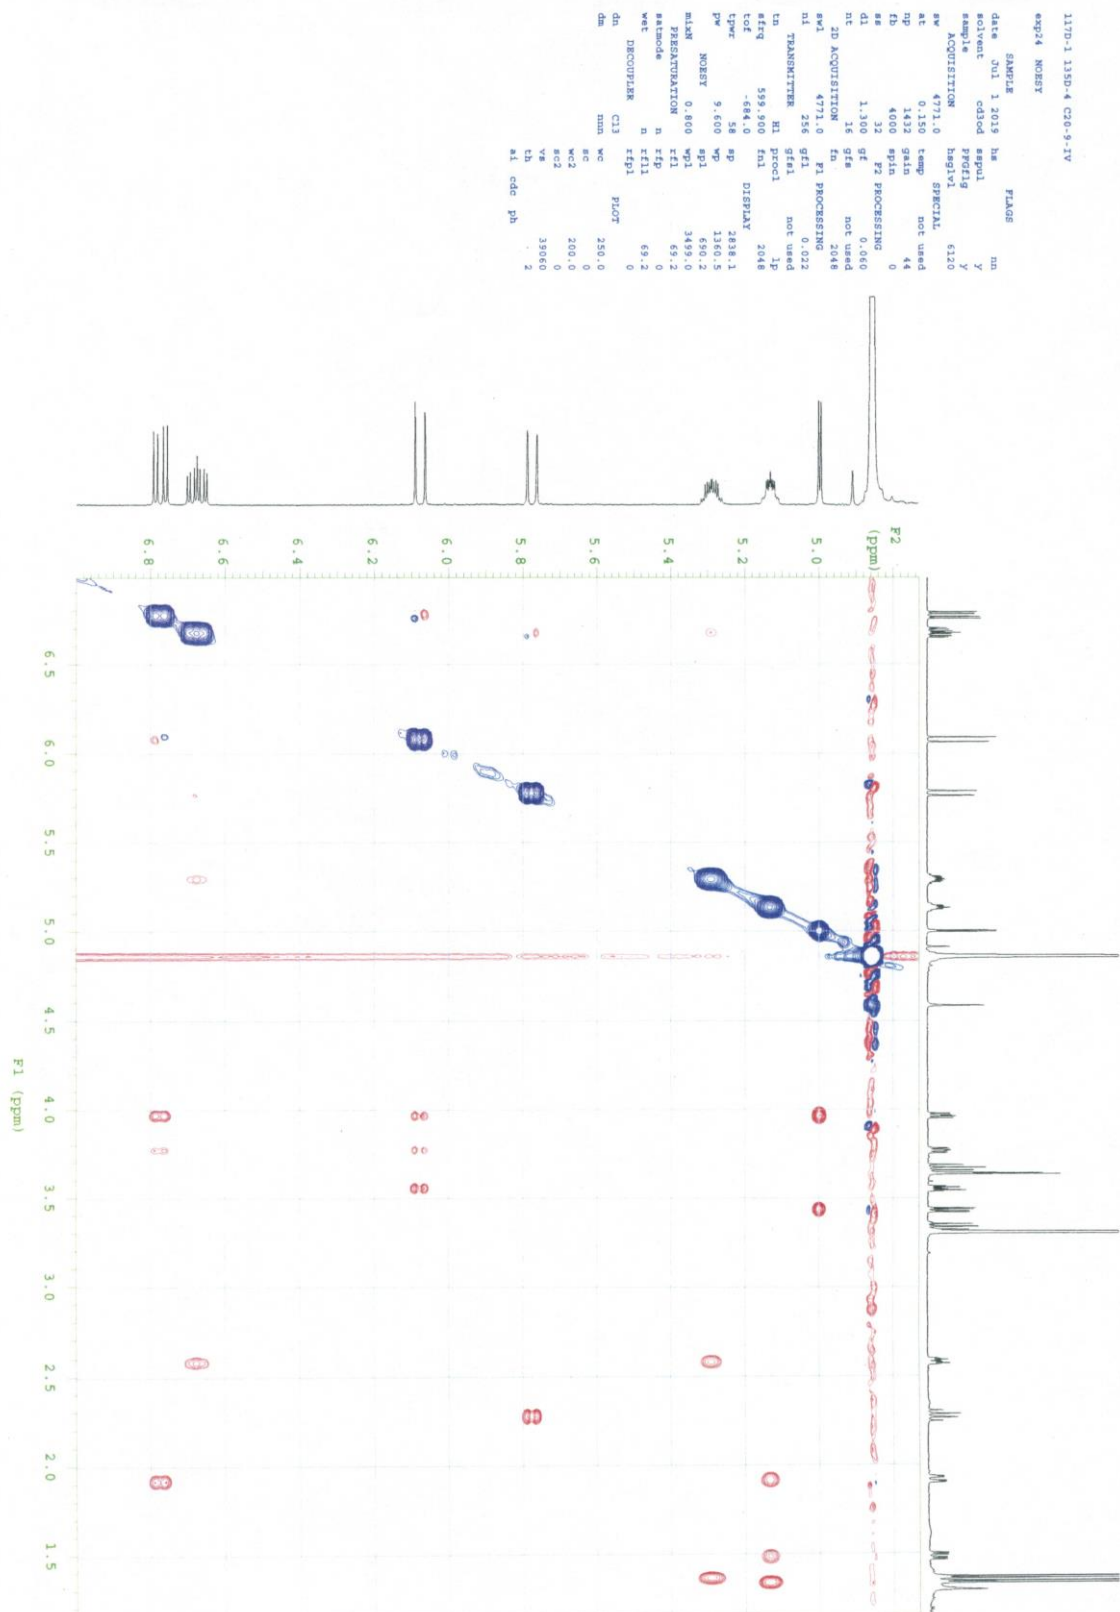

```

117D-1 135D-4 C20-9-IV
exp24 ROBERT

SAMPLE
date Jul 1 2015 hm
solvent cdcl3 aspl
sample y
PROG y
ACQUISITION hsq1v1 6120
sw 4771.0 SPECIAL
at 0.150 temp not used
np 1432 gain 44
fb 4000 spin 0
sa 32 F2 PROCESSING 0
ol 1.300 gf 0.060
nl 1.300 gf 0.060
F1 ACQUISITION 4771.0 not used
F2 ACQUISITION 4771.0 not used
F1 PROCESSING 256 gf1 not used
F2 PROCESSING 256 gf1 not used
TRANSMITTER H1 proc1 1p
ln 599.900 fml 2048
sfreq 599.900 fml 2048
tof -684.0 DISPLAY
tpwr 58 sp 699.6
pw 9.600 wp 1789.1
mkn ROBERT 0.400 ap1 694.8
PRESATURATION D 1779.8
satpwr 4000 fml 69.2
wet n rft1 69.2
DECOUPLE C13 rfp1 0
dm C13 FLOT 200.0
nm wc 200.0
nc 0
wc2 200.0
nc2 0
vs 35060
lh 2
al cdc ph

```

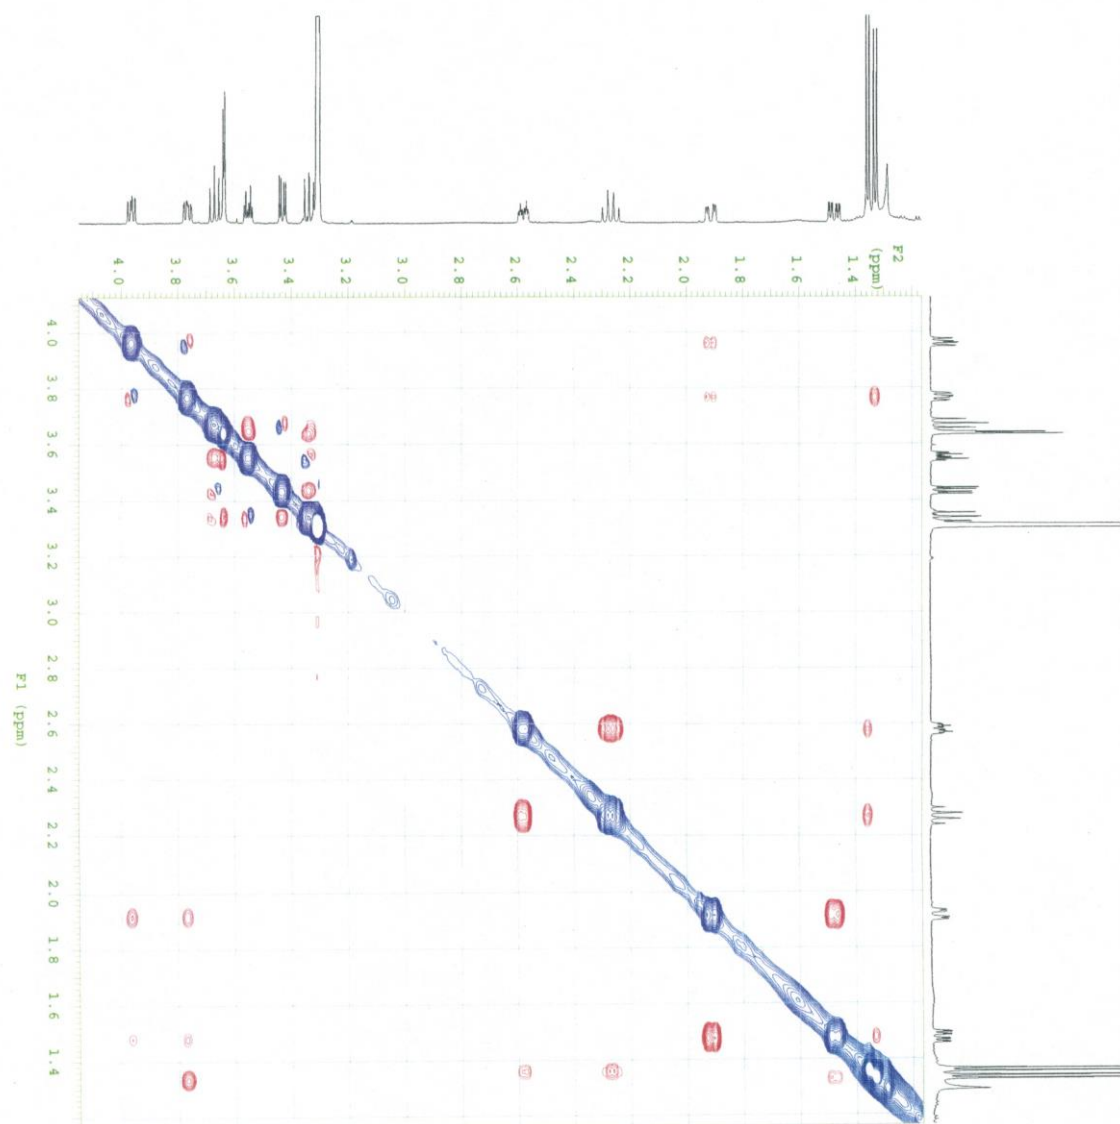

Figure S14 HMQC of 3

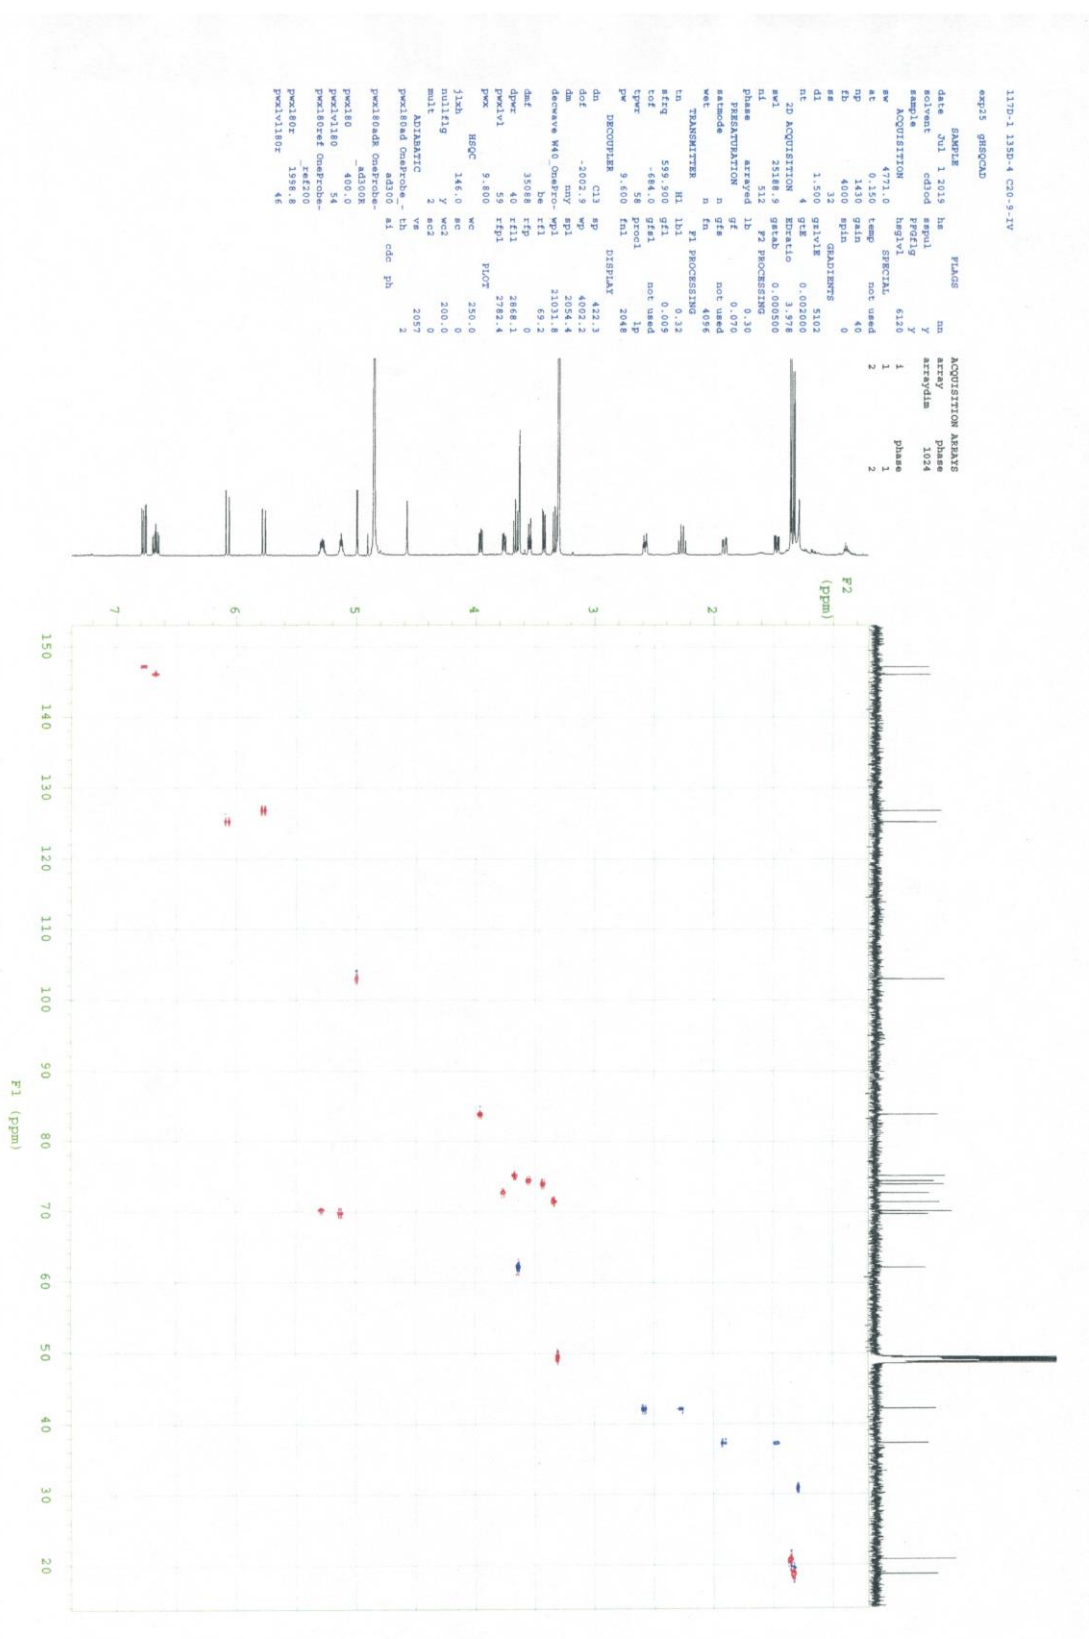

exp25 ghsqcal

|                    |       |
|--------------------|-------|
| ACQUISITION ARRAYS |       |
| array              | phase |
| arraydim           | 1024  |
| 1                  | phase |
| 1                  | 1     |
| 2                  | 2     |

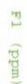



exp25 gnsqcad

pwk1v1180r 46

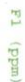



Figure S15 HMBC of 3

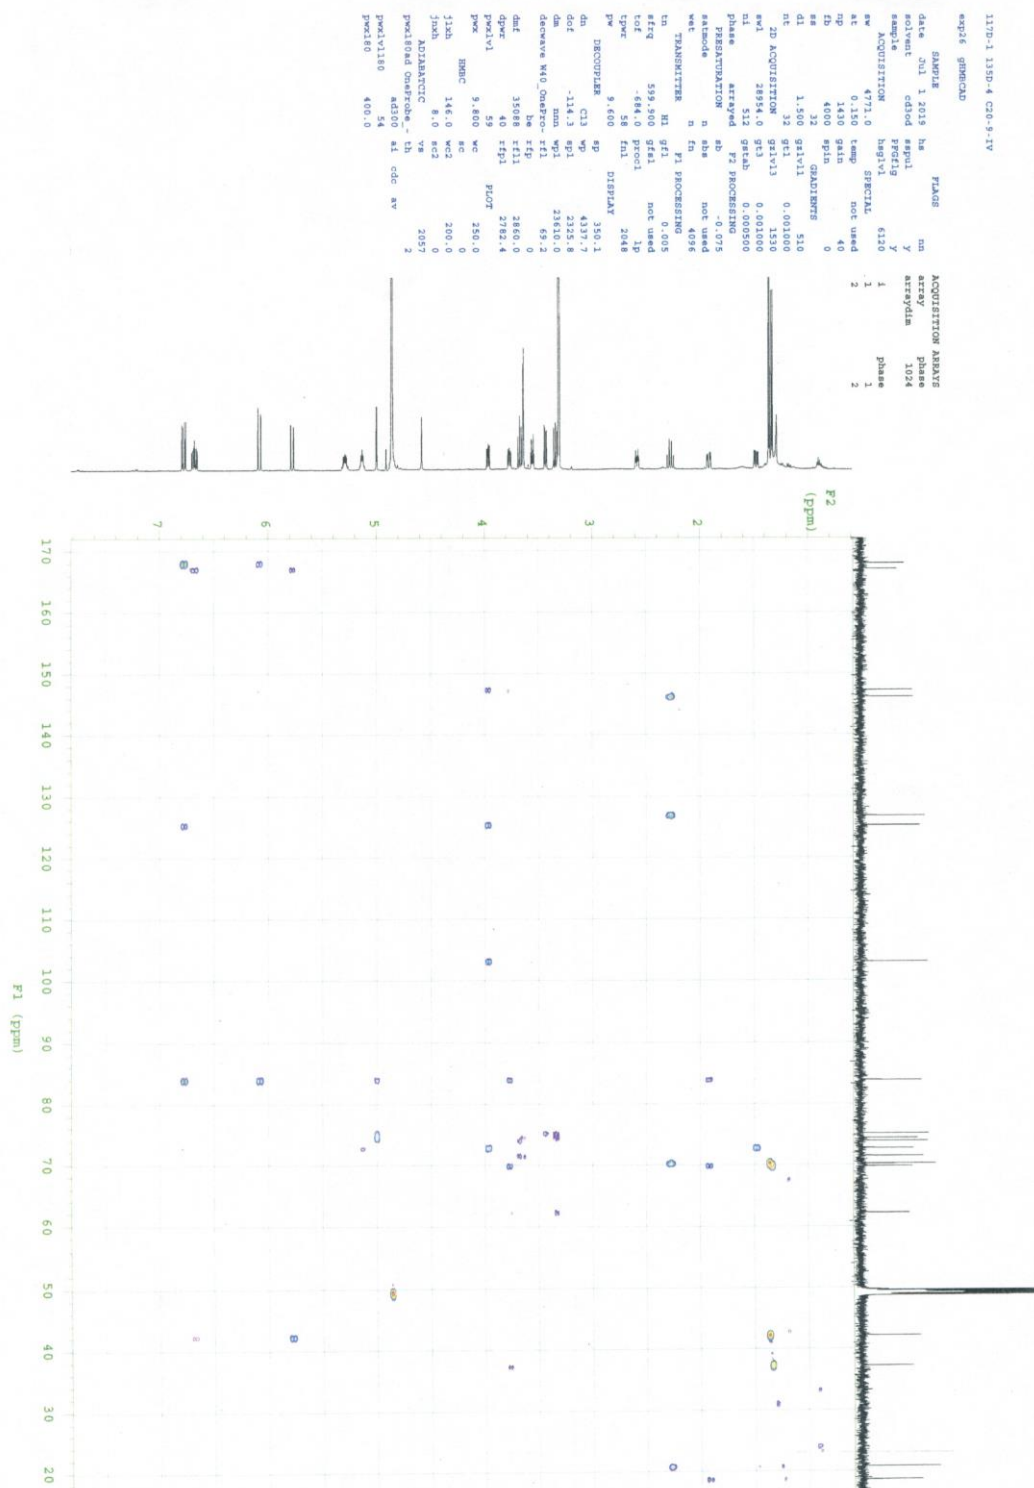

117D-1 135D-4 C20-9-IV

exp26 gbrmclad

NAME: FLAG: nm  
date Jul 1 2019  
solvent cdcl3  
sample y  
ACQUISITION hsq1v1 6120  
sw 4771.0 SPECIAL  
at 0.150 temp not used  
np 1410 gain 40  
f2 32 4000 spin 0  
d1 1.500 g1v1 510  
d2 0.125 g1v1 0.001000  
F2 ACQUISITION g1v1 1350  
sw1 2854.0 g1v1 0.001000  
rl 512 g1v1 0.000500  
phase arrayed F2 PROCESSING  
PRESATURATION ab -0.075  
satmode n abe not used  
wet n fn not used  
TRANSMITTER F1 PROCESSING  
tx 81 g1v1 0.005  
strq 559.500 g1v1 not used  
tcf -644.0 f1v1 1p  
tpr 9.600 f1v1 2048  
DECOUPLER SP DISPLAY 558.1  
dn C13 wp 3457.1  
dot -114.3 wp 15106.3  
dm nm wp1 10772.9  
decave W40 OnaPro- r1 59.2  
dnt Be rfp 0  
dpr 35088 r1v1 2860.0  
dpr 40 rfp1 2782.4  
pex1v1 59 p1v1 250.0  
pex 9.600 wc 250.0  
j1v1 146.0 wc2 200.0  
j1v1 8.0 wc2 2057  
ADJUNCTIC va  
pex1v1 OnaPro- th 2  
pex1v1 54 ad100 al cdc av  
pex1v1 400.0

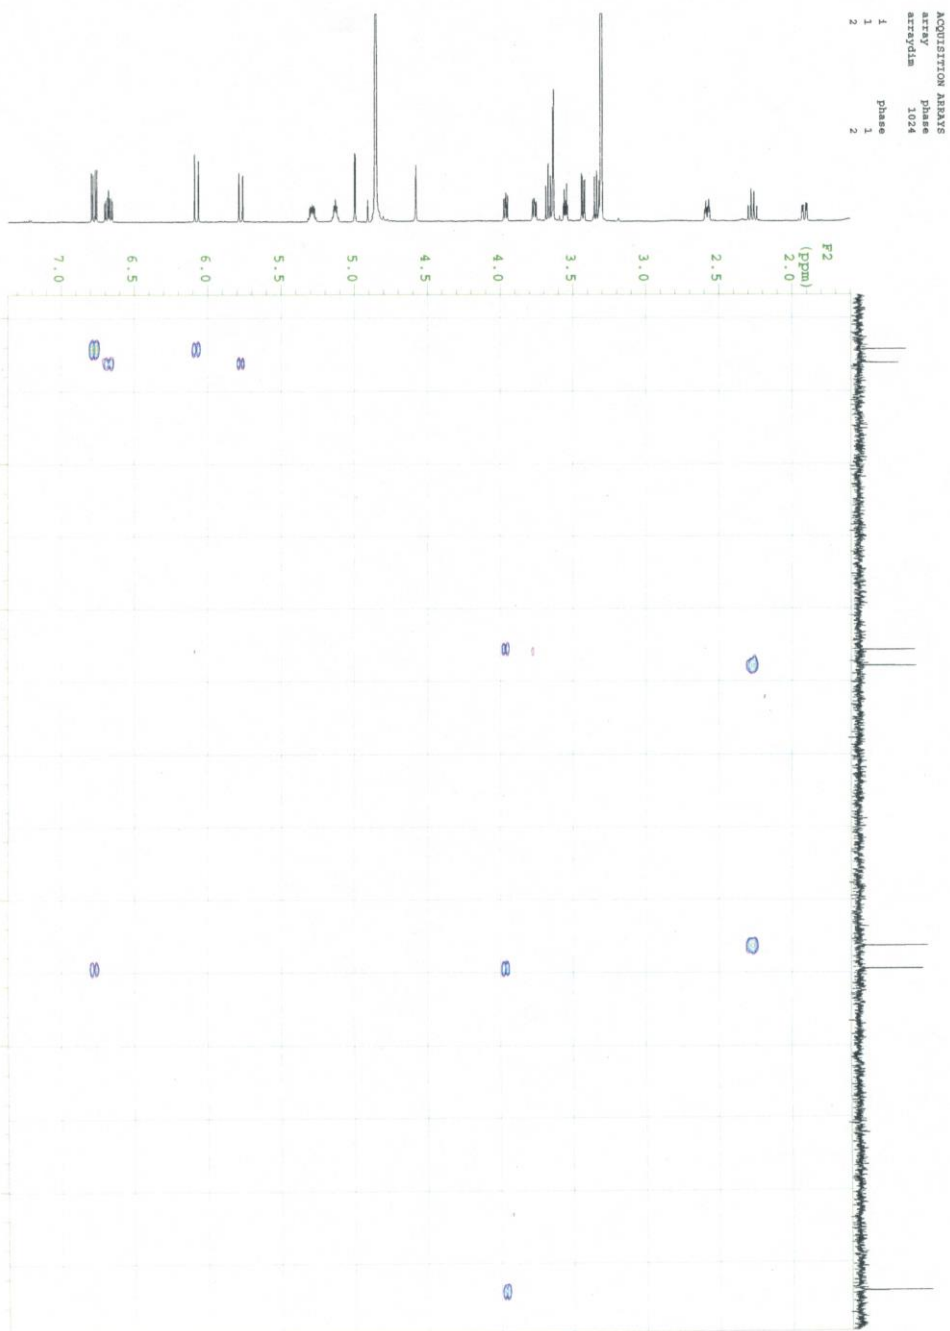

117D-1 115D-4 C20-5-IV

exp26 gsmcnd

SAMPLE FLAG  
date Jul 1 2015  
solvent CDCl3  
sample C20-5-IV  
ACQUISITION hmgv1 6120  
nu 4771.0 SPECIAL 1  
at 0.150 temp not used 2  
np 1410 gain 40  
fb 4000 spin 0  
ss 32 GRABBER 510  
dl 1.500 g1v11 0.001000  
nt 32 g1v13 1530  
2D ACQUISITION g1v13 1530  
w1 26934.0 g1b 0.001000  
w2 512 g1v1b 0.001000  
Phase Arrived 2 PROCESSING  
PRESENTATION ab not used  
astmode n ab not used  
wet n fn 4096  
TRANSMITTER F1 PROCESSING  
tn n1 g1 0.005  
afq 599.900 g1a1 not used  
tof -564.0 p1a1 1p  
lpr 58 fn1 2048  
pw 9.600 DISPLAY 373.4  
DECOUPLER C13 ap 4286.4  
dn -114.3 ap1 3150.2  
de 3150.2  
decoupe W40 Gmptco-rf1 69.2  
dnt 3508 rf1 2860.0  
dpr 40 rf1 2782.4  
pwa1 59 PLOT 250.0  
pwx 9.800 wc 0  
jsh 146.0 wc2 200.0  
jsh 8.0 wc2 0  
ADDITIONAL CH 2057  
pwa10 Gmptco-rf1 2  
pwa10 400.0

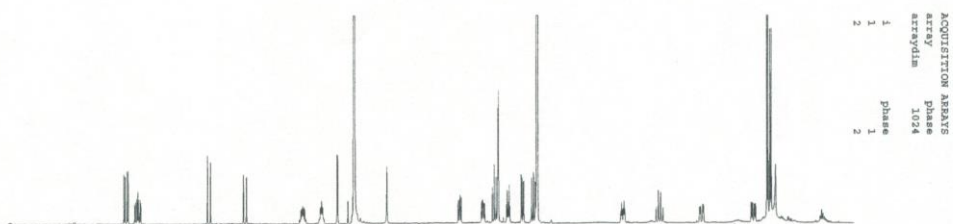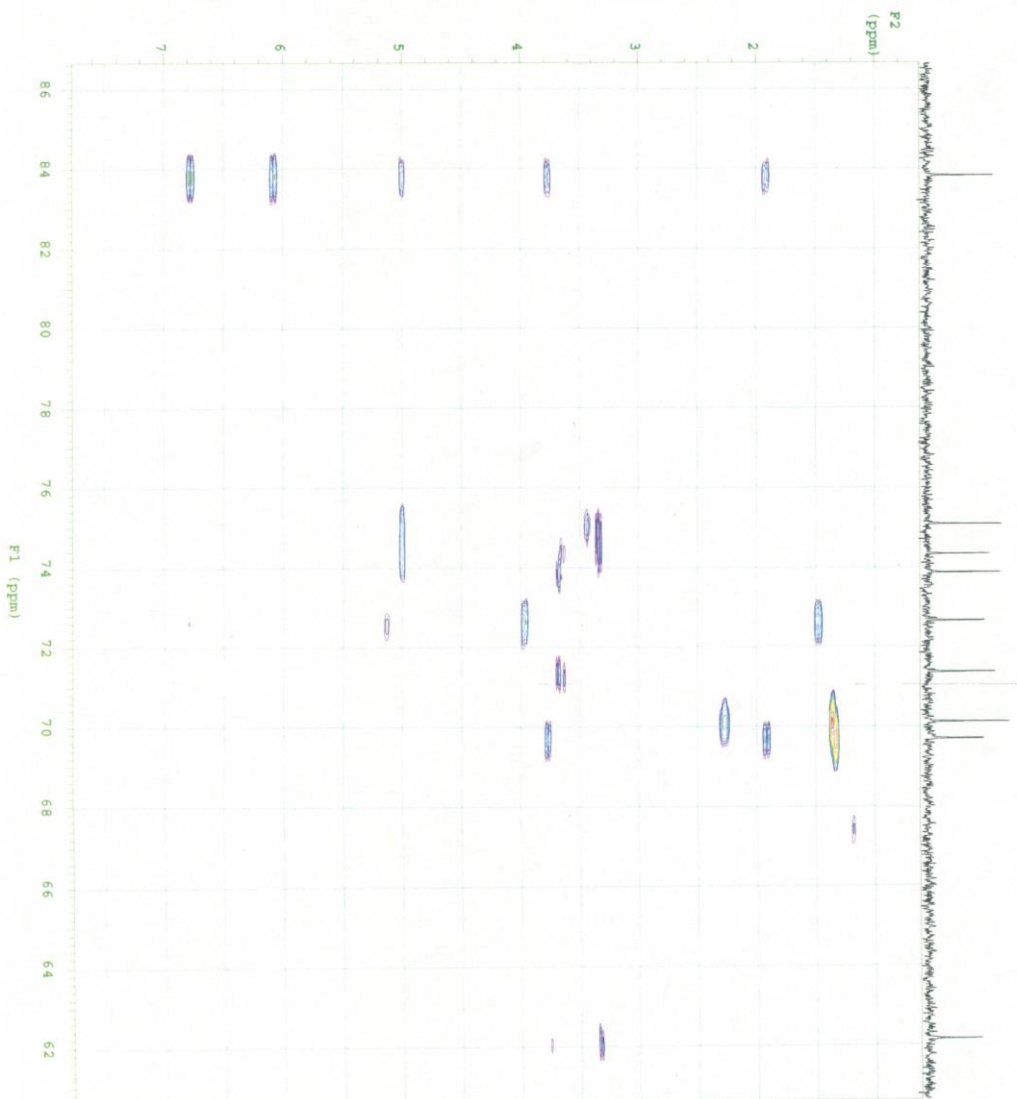

117D-1 135D-4 C20-9-IV  
exp26 gbmecad

| SAMPLE      |            | FLAGS     |          | ACQUISITION ANALYSIS |       |
|-------------|------------|-----------|----------|----------------------|-------|
| date        | Jul 1 2015 | ba        | nm       | acq                  | phase |
| solvent     | cdcl3      | aspl      | y        | array                | 1024  |
| sample      | precig     | ba        | y        | array                | 1024  |
| ACQUISITION | beg1v1     | SPECIAL   | 6120     | 1                    | 1     |
| ac          | 4771.0     | temp      | not used | 2                    | 2     |
| ap          | 0.150      | gain      | 40       |                      |       |
| bp          | 1430       | spin      | 0        |                      |       |
| cb          | 4000       | GRABINITS | 0        |                      |       |
| cc          | 32         |           |          |                      |       |
| cd          | 1.500      | g1v1      | 510      |                      |       |
| de          | 0.001000   |           |          |                      |       |
| df          | 0.001000   |           |          |                      |       |
| dg          | 0.001000   |           |          |                      |       |
| dh          | 0.001000   |           |          |                      |       |
| di          | 0.001000   |           |          |                      |       |
| dj          | 0.001000   |           |          |                      |       |
| dk          | 0.001000   |           |          |                      |       |
| dl          | 0.001000   |           |          |                      |       |
| dm          | 0.001000   |           |          |                      |       |
| dn          | 0.001000   |           |          |                      |       |
| do          | 0.001000   |           |          |                      |       |
| dp          | 0.001000   |           |          |                      |       |
| dq          | 0.001000   |           |          |                      |       |
| dr          | 0.001000   |           |          |                      |       |
| ds          | 0.001000   |           |          |                      |       |
| dt          | 0.001000   |           |          |                      |       |
| du          | 0.001000   |           |          |                      |       |
| dv          | 0.001000   |           |          |                      |       |
| dw          | 0.001000   |           |          |                      |       |
| dx          | 0.001000   |           |          |                      |       |
| dy          | 0.001000   |           |          |                      |       |
| dz          | 0.001000   |           |          |                      |       |
| ea          | 0.001000   |           |          |                      |       |
| eb          | 0.001000   |           |          |                      |       |
| ec          | 0.001000   |           |          |                      |       |
| ed          | 0.001000   |           |          |                      |       |
| ee          | 0.001000   |           |          |                      |       |
| ef          | 0.001000   |           |          |                      |       |
| eg          | 0.001000   |           |          |                      |       |
| eh          | 0.001000   |           |          |                      |       |
| ei          | 0.001000   |           |          |                      |       |
| ej          | 0.001000   |           |          |                      |       |
| ek          | 0.001000   |           |          |                      |       |
| el          | 0.001000   |           |          |                      |       |
| em          | 0.001000   |           |          |                      |       |
| en          | 0.001000   |           |          |                      |       |
| eo          | 0.001000   |           |          |                      |       |
| ep          | 0.001000   |           |          |                      |       |
| eq          | 0.001000   |           |          |                      |       |
| er          | 0.001000   |           |          |                      |       |
| es          | 0.001000   |           |          |                      |       |
| et          | 0.001000   |           |          |                      |       |
| eu          | 0.001000   |           |          |                      |       |
| ev          | 0.001000   |           |          |                      |       |
| ew          | 0.001000   |           |          |                      |       |
| ex          | 0.001000   |           |          |                      |       |
| ey          | 0.001000   |           |          |                      |       |
| ez          | 0.001000   |           |          |                      |       |
| fa          | 0.001000   |           |          |                      |       |
| fb          | 0.001000   |           |          |                      |       |
| fc          | 0.001000   |           |          |                      |       |
| fd          | 0.001000   |           |          |                      |       |
| fe          | 0.001000   |           |          |                      |       |
| ff          | 0.001000   |           |          |                      |       |
| fg          | 0.001000   |           |          |                      |       |
| fh          | 0.001000   |           |          |                      |       |
| fi          | 0.001000   |           |          |                      |       |
| fj          | 0.001000   |           |          |                      |       |
| fk          | 0.001000   |           |          |                      |       |
| fl          | 0.001000   |           |          |                      |       |
| fm          | 0.001000   |           |          |                      |       |
| fn          | 0.001000   |           |          |                      |       |
| fo          | 0.001000   |           |          |                      |       |
| fp          | 0.001000   |           |          |                      |       |
| fq          | 0.001000   |           |          |                      |       |
| fr          | 0.001000   |           |          |                      |       |
| fs          | 0.001000   |           |          |                      |       |
| ft          | 0.001000   |           |          |                      |       |
| fu          | 0.001000   |           |          |                      |       |
| fv          | 0.001000   |           |          |                      |       |
| fw          | 0.001000   |           |          |                      |       |
| fx          | 0.001000   |           |          |                      |       |
| fy          | 0.001000   |           |          |                      |       |
| fz          | 0.001000   |           |          |                      |       |
| ga          | 0.001000   |           |          |                      |       |
| gb          | 0.001000   |           |          |                      |       |
| gc          | 0.001000   |           |          |                      |       |
| gd          | 0.001000   |           |          |                      |       |
| ge          | 0.001000   |           |          |                      |       |
| gf          | 0.001000   |           |          |                      |       |
| gh          | 0.001000   |           |          |                      |       |
| gi          | 0.001000   |           |          |                      |       |
| gj          | 0.001000   |           |          |                      |       |
| gk          | 0.001000   |           |          |                      |       |
| gl          | 0.001000   |           |          |                      |       |
| gm          | 0.001000   |           |          |                      |       |
| gn          | 0.001000   |           |          |                      |       |
| go          | 0.001000   |           |          |                      |       |
| gp          | 0.001000   |           |          |                      |       |
| gq          | 0.001000   |           |          |                      |       |
| gr          | 0.001000   |           |          |                      |       |
| gs          | 0.001000   |           |          |                      |       |
| gt          | 0.001000   |           |          |                      |       |
| gu          | 0.001000   |           |          |                      |       |
| gv          | 0.001000   |           |          |                      |       |
| gw          | 0.001000   |           |          |                      |       |
| gx          | 0.001000   |           |          |                      |       |
| gy          | 0.001000   |           |          |                      |       |
| gz          | 0.001000   |           |          |                      |       |
| ha          | 0.001000   |           |          |                      |       |
| hb          | 0.001000   |           |          |                      |       |
| hc          | 0.001000   |           |          |                      |       |
| hd          | 0.001000   |           |          |                      |       |
| he          | 0.001000   |           |          |                      |       |
| hf          | 0.001000   |           |          |                      |       |
| hg          | 0.001000   |           |          |                      |       |
| hh          | 0.001000   |           |          |                      |       |
| hi          | 0.001000   |           |          |                      |       |
| hj          | 0.001000   |           |          |                      |       |
| hk          | 0.001000   |           |          |                      |       |
| hl          | 0.001000   |           |          |                      |       |
| hm          | 0.001000   |           |          |                      |       |
| hn          | 0.001000   |           |          |                      |       |
| ho          | 0.001000   |           |          |                      |       |
| hp          | 0.001000   |           |          |                      |       |
| hq          | 0.001000   |           |          |                      |       |
| hr          | 0.001000   |           |          |                      |       |
| hs          | 0.001000   |           |          |                      |       |
| ht          | 0.001000   |           |          |                      |       |
| hu          | 0.001000   |           |          |                      |       |
| hv          | 0.001000   |           |          |                      |       |
| hw          | 0.001000   |           |          |                      |       |
| hx          | 0.001000   |           |          |                      |       |
| hy          | 0.001000   |           |          |                      |       |
| hz          | 0.001000   |           |          |                      |       |
| ia          | 0.001000   |           |          |                      |       |
| ib          | 0.001000   |           |          |                      |       |
| ic          | 0.001000   |           |          |                      |       |
| id          | 0.001000   |           |          |                      |       |
| ie          | 0.001000   |           |          |                      |       |
| if          | 0.001000   |           |          |                      |       |
| ig          | 0.001000   |           |          |                      |       |
| ih          | 0.001000   |           |          |                      |       |
| ii          | 0.001000   |           |          |                      |       |
| ij          | 0.001000   |           |          |                      |       |
| ik          | 0.001000   |           |          |                      |       |
| il          | 0.001000   |           |          |                      |       |
| im          | 0.001000   |           |          |                      |       |
| in          | 0.001000   |           |          |                      |       |
| io          | 0.001000   |           |          |                      |       |
| ip          | 0.001000   |           |          |                      |       |
| iq          | 0.001000   |           |          |                      |       |
| ir          | 0.001000   |           |          |                      |       |
| is          | 0.001000   |           |          |                      |       |
| it          | 0.001000   |           |          |                      |       |
| iu          | 0.001000   |           |          |                      |       |
| iv          | 0.001000   |           |          |                      |       |
| iw          | 0.001000   |           |          |                      |       |
| ix          | 0.001000   |           |          |                      |       |
| iy          | 0.001000   |           |          |                      |       |
| iz          | 0.001000   |           |          |                      |       |
| ja          | 0.001000   |           |          |                      |       |
| jb          | 0.001000   |           |          |                      |       |
| jc          | 0.001000   |           |          |                      |       |
| jd          | 0.001000   |           |          |                      |       |
| je          | 0.001000   |           |          |                      |       |
| jf          | 0.001000   |           |          |                      |       |
| jj          | 0.001000   |           |          |                      |       |
| jk          | 0.001000   |           |          |                      |       |
| jl          | 0.001000   |           |          |                      |       |
| jm          | 0.001000   |           |          |                      |       |
| jn          | 0.001000   |           |          |                      |       |
| jo          | 0.001000   |           |          |                      |       |
| jp          | 0.001000   |           |          |                      |       |
| jq          | 0.001000   |           |          |                      |       |
| jr          | 0.001000   |           |          |                      |       |
| js          | 0.001000   |           |          |                      |       |
| jt          | 0.001000   |           |          |                      |       |
| ju          | 0.001000   |           |          |                      |       |
| jv          | 0.001000   |           |          |                      |       |
| jw          | 0.001000   |           |          |                      |       |
| jx          | 0.001000   |           |          |                      |       |
| jy          | 0.001000   |           |          |                      |       |
| jz          | 0.001000   |           |          |                      |       |
| ka          | 0.001000   |           |          |                      |       |
| kb          | 0.001000   |           |          |                      |       |
| kc          | 0.001000   |           |          |                      |       |
| kd          | 0.001000   |           |          |                      |       |
| ke          | 0.001000   |           |          |                      |       |
| kf          | 0.001000   |           |          |                      |       |
| kg          | 0.001000   |           |          |                      |       |
| kh          | 0.001000   |           |          |                      |       |
| ki          | 0.001000   |           |          |                      |       |
| kj          | 0.001000   |           |          |                      |       |
| kk          | 0.001000   |           |          |                      |       |
| kl          | 0.001000   |           |          |                      |       |
| km          | 0.001000   |           |          |                      |       |
| kn          | 0.001000   |           |          |                      |       |
| ko          | 0.001000   |           |          |                      |       |
| kp          | 0.001000   |           |          |                      |       |
| kq          | 0.001000   |           |          |                      |       |
| kr          | 0.001000   |           |          |                      |       |
| ks          | 0.001000   |           |          |                      |       |
| kt          | 0.001000   |           |          |                      |       |
| ku          | 0.001000   |           |          |                      |       |
| kv          | 0.001000   |           |          |                      |       |
| kw          | 0.001000   |           |          |                      |       |
| kx          | 0.001000   |           |          |                      |       |
| ky          | 0.001000   |           |          |                      |       |
| kz          | 0.001000   |           |          |                      |       |
| la          | 0.001000   |           |          |                      |       |
| lb          | 0.001000   |           |          |                      |       |
| lc          | 0.001000   |           |          |                      |       |
| ld          | 0.001000   |           |          |                      |       |
| le          | 0.001000   |           |          |                      |       |
| lf          | 0.001000   |           |          |                      |       |
| lg          | 0.001000   |           |          |                      |       |
| lh          | 0.001000   |           |          |                      |       |
| li          | 0.001000   |           |          |                      |       |
| lj          | 0.001000   |           |          |                      |       |
| lk          | 0.001000   |           |          |                      |       |
| ll          | 0.001000   |           |          |                      |       |
| lm          | 0.001000   |           |          |                      |       |
| ln          | 0.001000   |           |          |                      |       |
| lo          | 0.001000   |           |          |                      |       |
| lp          | 0.001000   |           |          |                      |       |
| lq          | 0.001000   |           |          |                      |       |
| lr          | 0.001000   |           |          |                      |       |
| ls          | 0.001000   |           |          |                      |       |
| lt          | 0.001000   |           |          |                      |       |
| lu          | 0.001000   |           |          |                      |       |
| lv          | 0.001000   |           |          |                      |       |
| lw          | 0.001000   |           |          |                      |       |
| lx          | 0.001000   |           |          |                      |       |
| ly          | 0.001000   |           |          |                      |       |
| lz          | 0.001000   |           |          |                      |       |
| ma          | 0.001000   |           |          |                      |       |
| mb          | 0.001000   |           |          |                      |       |
| mc          | 0.001000   |           |          |                      |       |
| md          | 0.001000   |           |          |                      |       |
| me          | 0.001000   |           |          |                      |       |
| mf          | 0.001000   |           |          |                      |       |
| mg          | 0.001000   |           |          |                      |       |
| mh          | 0.001000   |           |          |                      |       |
| mi          | 0.001000   |           |          |                      |       |
| mj          | 0.001000   |           |          |                      |       |
| mk          | 0.001000   |           |          |                      |       |
| ml          | 0.001000   |           |          |                      |       |
| mm          | 0.001000   |           |          |                      |       |
| mn          | 0.001000   |           |          |                      |       |
| mo          | 0.001000   |           |          |                      |       |
| mp          | 0.001000   |           |          |                      |       |
| mq          | 0.001000   |           |          |                      |       |
| mr          | 0.001000   |           |          |                      |       |
| ms          | 0.001000   |           |          |                      |       |

Figure S16 FABMS of 3

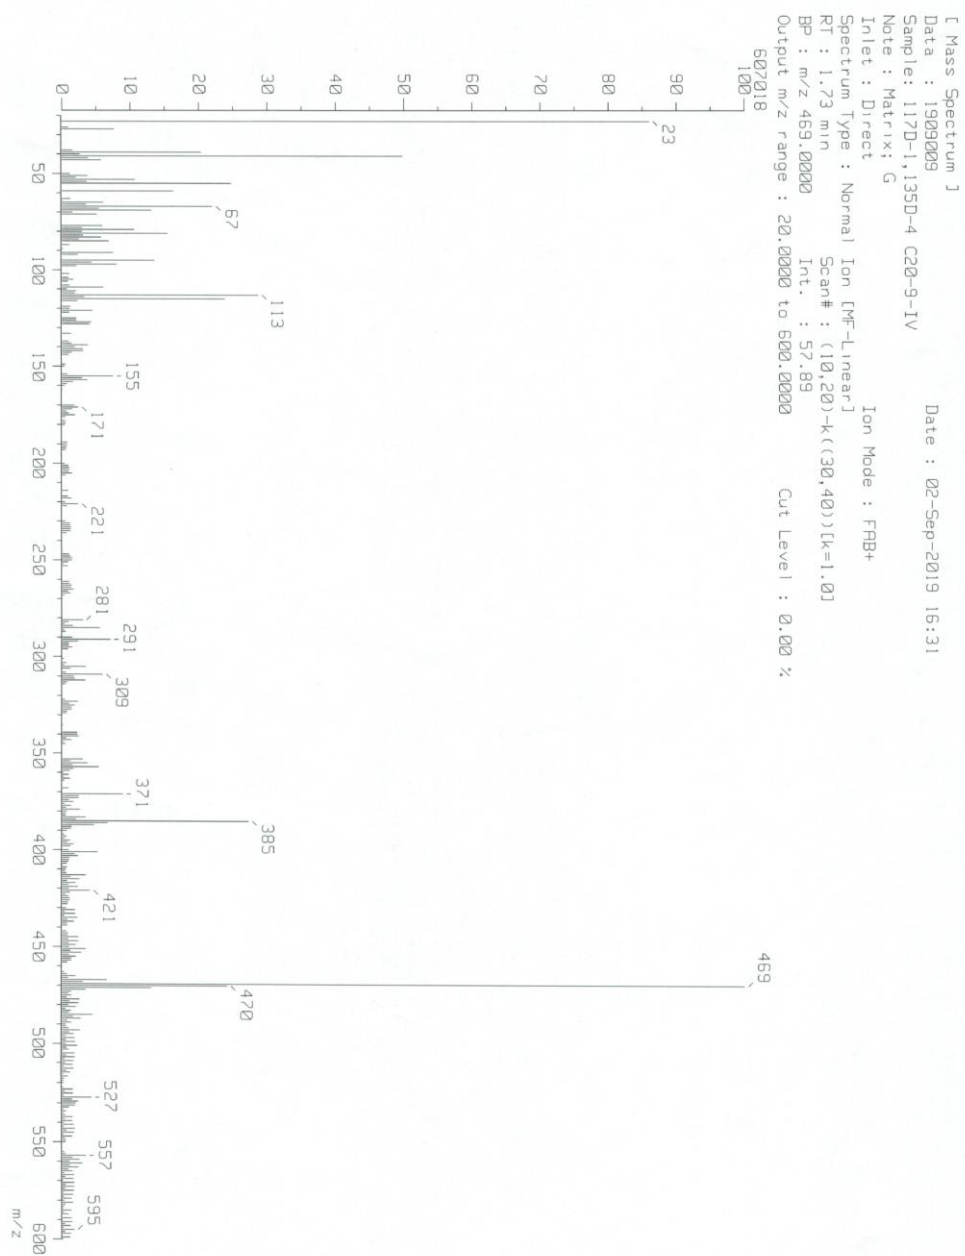

[ Mass Spectrum ]

Data : 1909009

Date : 02-Sep-2019 16:31

Page: 1

Sample: 117D-1,135D-4 C20-9-IV

Note : Matrix; G

Inlet : Direct

Ion Mode : FAB+

Spectrum Type : Normal Ion [MF-Linear]

RT : 1.73 min Scan# : (10,20)-k((30,40)) [k=1.0]

BP : m/z 469.0000 Int. : 57.89

Output m/z range : 20.0000 to 600.0000

Cut Level : 3.00 %

| m/z      | Int.  | Norm. | m/z      | Int.  | Norm.  |
|----------|-------|-------|----------|-------|--------|
| 23.0000  | 49.79 | 86.02 | 387.0000 | 2.68  | 4.63   |
| 27.0000  | 4.40  | 7.60  | 401.0000 | 2.97  | 5.14   |
| 39.0000  | 11.78 | 20.35 | 413.0000 | 1.99  | 3.43   |
| 41.0000  | 28.83 | 49.80 | 421.0000 | 2.33  | 4.03   |
| 42.0000  | 2.21  | 3.82  | 451.0000 | 1.97  | 3.41   |
| 43.0000  | 3.32  | 5.74  | 467.0000 | 3.79  | 6.55   |
| 51.0000  | 2.16  | 3.73  | 468.0000 | 1.74  | 3.00   |
| 53.0000  | 6.19  | 10.69 | 469.0000 | 57.89 | 100.00 |
| 54.0000  | 2.09  | 3.61  | 470.0000 | 13.96 | 24.12  |
| 55.0000  | 14.31 | 24.71 | 471.0000 | 7.52  | 12.99  |
| 59.0000  | 9.43  | 16.28 | 472.0000 | 1.97  | 3.41   |
| 65.0000  | 3.51  | 6.06  | 485.0000 | 2.56  | 4.43   |
| 66.0000  | 2.06  | 3.56  | 527.0000 | 2.45  | 4.24   |
| 67.0000  | 12.72 | 21.98 | 557.0000 | 1.96  | 3.39   |
| 68.0000  | 3.14  | 5.42  |          |       |        |
| 69.0000  | 7.57  | 13.08 |          |       |        |
| 71.0000  | 2.95  | 5.10  |          |       |        |
| 77.0000  | 3.44  | 5.94  |          |       |        |
| 79.0000  | 6.12  | 10.57 |          |       |        |
| 81.0000  | 8.94  | 15.45 |          |       |        |
| 82.0000  | 1.76  | 3.05  |          |       |        |
| 83.0000  | 3.32  | 5.73  |          |       |        |
| 85.0000  | 3.97  | 6.85  |          |       |        |
| 91.0000  | 4.32  | 7.46  |          |       |        |
| 95.0000  | 7.84  | 13.55 |          |       |        |
| 96.0000  | 2.50  | 4.31  |          |       |        |
| 97.0000  | 4.64  | 8.02  |          |       |        |
| 109.0000 | 3.48  | 6.02  |          |       |        |
| 113.0000 | 16.60 | 28.67 |          |       |        |
| 114.0000 | 1.88  | 3.24  |          |       |        |
| 115.0000 | 13.78 | 23.80 |          |       |        |
| 121.0000 | 2.59  | 4.47  |          |       |        |
| 127.0000 | 2.47  | 4.27  |          |       |        |
| 128.0000 | 2.33  | 4.02  |          |       |        |
| 139.0000 | 2.19  | 3.79  |          |       |        |
| 141.0000 | 1.74  | 3.01  |          |       |        |
| 142.0000 | 1.76  | 3.04  |          |       |        |
| 155.0000 | 4.31  | 7.44  |          |       |        |
| 157.0000 | 2.14  | 3.69  |          |       |        |
| 285.0000 | 3.17  | 5.47  |          |       |        |
| 291.0000 | 4.05  | 6.99  |          |       |        |
| 305.0000 | 1.96  | 3.39  |          |       |        |
| 309.0000 | 3.39  | 5.85  |          |       |        |
| 312.0000 | 1.90  | 3.29  |          |       |        |
| 355.0000 | 2.12  | 3.66  |          |       |        |
| 357.0000 | 3.07  | 5.30  |          |       |        |
| 371.0000 | 5.10  | 8.82  |          |       |        |
| 383.0000 | 1.96  | 3.39  |          |       |        |
| 385.0000 | 15.74 | 27.18 |          |       |        |
| 386.0000 | 3.83  | 6.61  |          |       |        |

[ Elemental Composition ]

Page: 1

Data : 1909155 Date : 18-Sep-2019 16:52  
Sample: 117D-1,135D-4 C20-9-IV  
Note : Matrix; G  
Inlet : Direct Ion Mode : FAB+  
RT : 8.37 min Scan#: (75,80)  
Elements : C 25/15, H 35/25, O 15/0, Na 1/0  
Mass Tolerance : 20ppm, 1mmu if m/z > 50  
Unsaturation (U.S.) : -1.0 - 40.0

| Observed m/z | Int%  | Err[ppm / mmu] | U.S. | Composition       |
|--------------|-------|----------------|------|-------------------|
| 469.1692     | 100.0 | +1.2 / +0.6    | 5.5  | C 20 H 30 O 11 Na |

469.1697



Figure S17 IR spectrum of 3

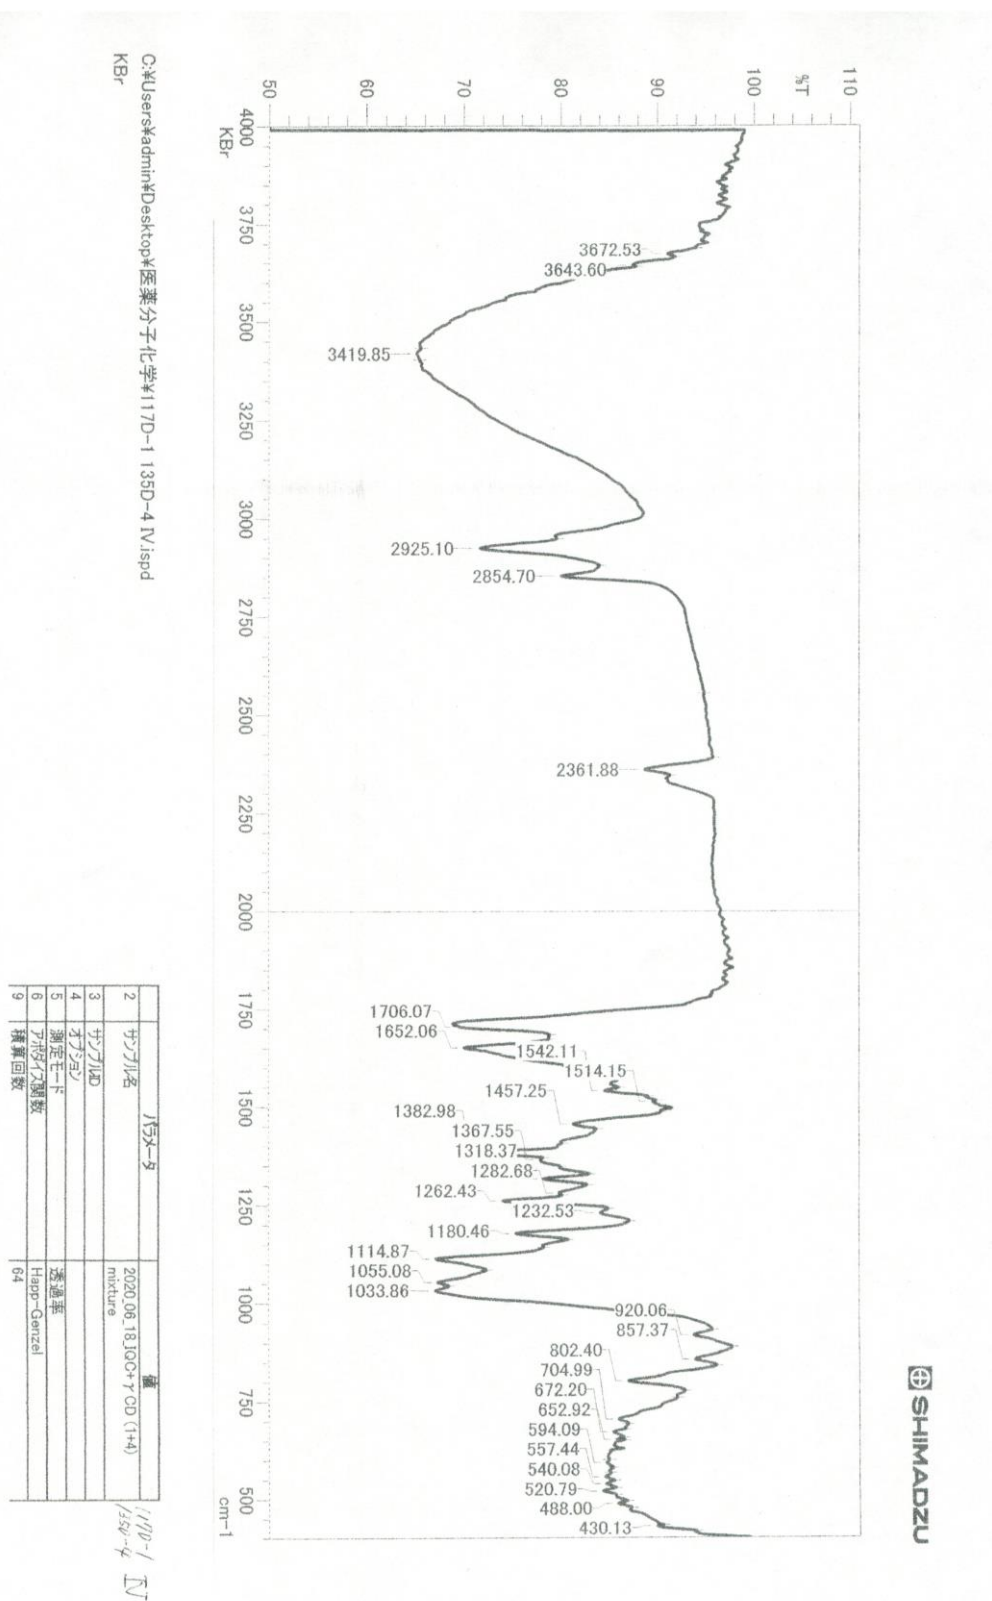



**Figure S18 HPLC chromatograms of halosmycins A, B, and C**

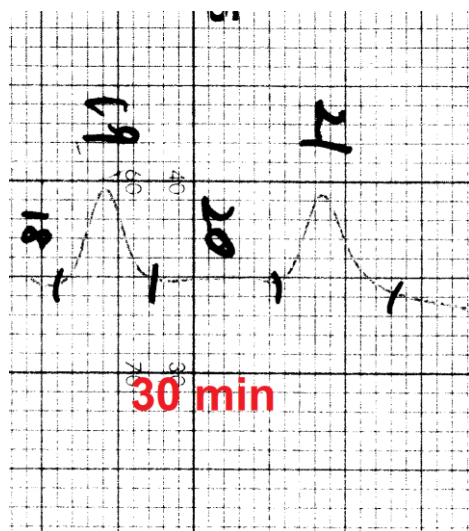

Peak 19: halosmycins B (r.t. 28.8 min)

Peak 21: halosmycins A (r.t. 31.7 min)

Column: Cosmosil Packed Column 5C18-MSII (25 cm X 20 mm i.d.)

Mobile phase: 80% MeOH in H<sub>2</sub>O

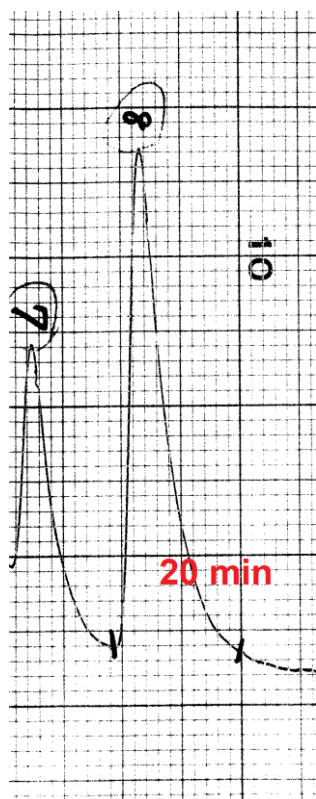

Peak 8: halosmycins C (r.t. 18.3 min)

Column: Cosmosil Packed Column 5C18-MSII (25 cm X 20 mm i.d.)

Mobile phase: 80% MeOH in H<sub>2</sub>O

Figure S19  $^1\text{H}$  NMR spectrum of 5-hydroxy-(2*E*)-hexenoic acid in  $\text{MeOH-}d_4$

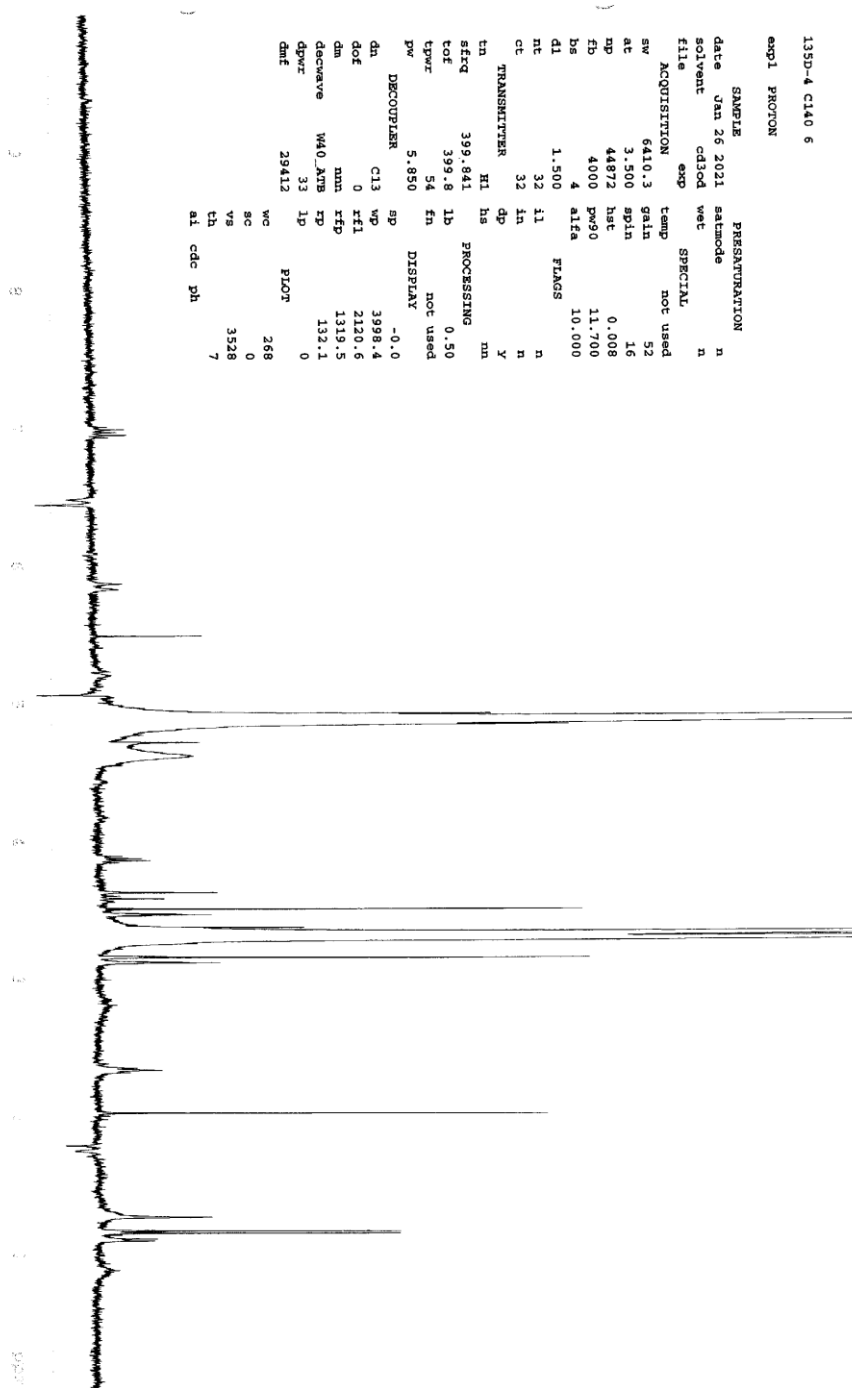

Figure S20  $^1\text{H}$  NMR spectrum of 4,5,7-trihydroxy-(2*E*)-octenoic acid in  $\text{MeOH-}d_4$

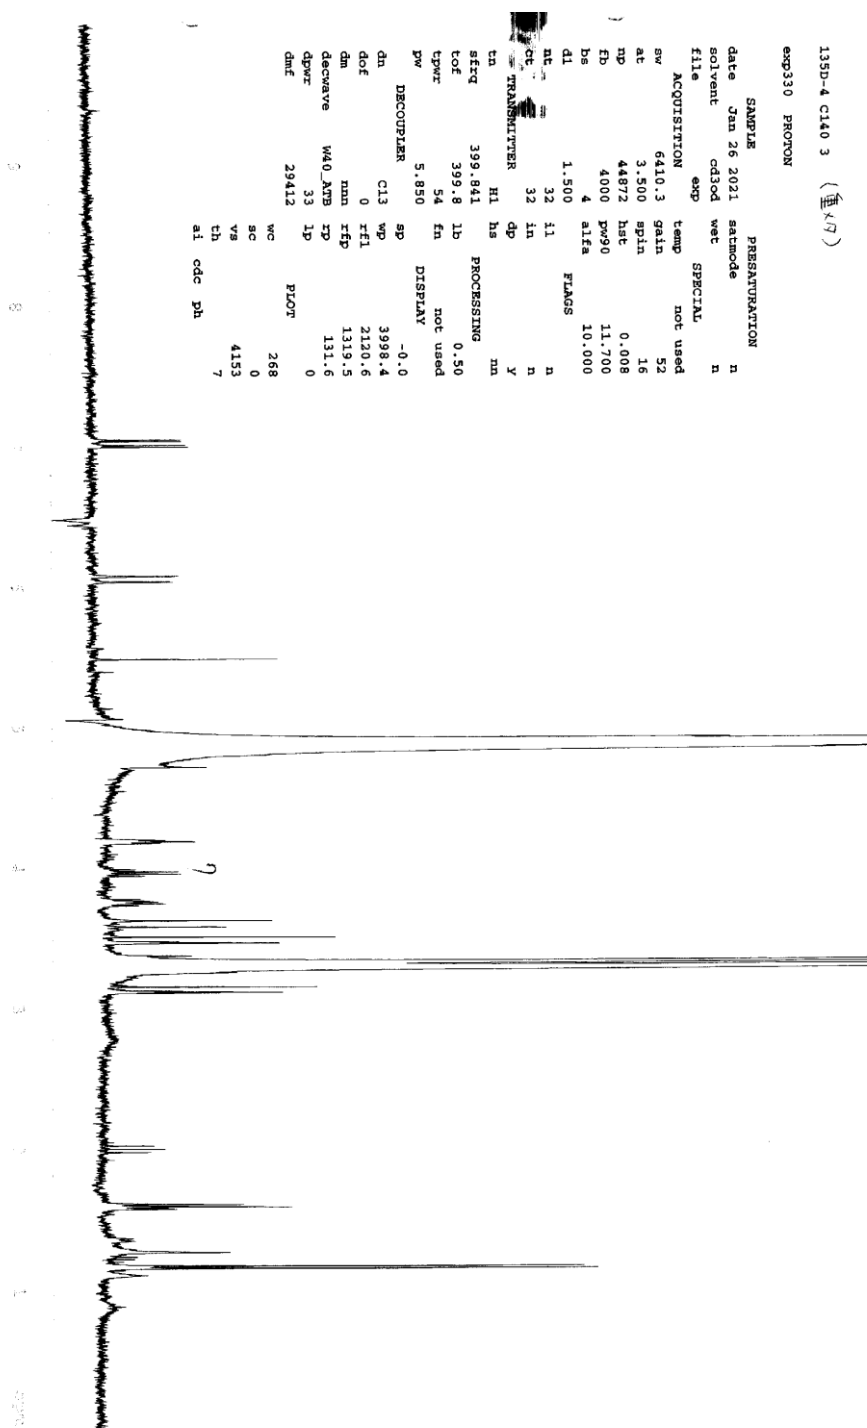

Supplement: s1 [file s1]
